# Supplementary material
Source: PubMed Central journal article supplement (PMC5033861)
Supplement: jciinsight-1-86660-s001.pdf [file jciinsight-1-86660-s001.pdf]

**Supplemental Data for:**

**Proteomics analysis reveals a Th17-prone cell population in pre-symptomatic graft-versus-host disease**

**Authors:** Wei Li,<sup>1\*</sup> Liangyi Liu,<sup>1\*</sup> Aurelie Gomez,<sup>2\*</sup> Jilu Zhang,<sup>1</sup> Abdulraouf Ramadan,<sup>1</sup> Qing Zhang,<sup>3</sup> Sung W. Choi,<sup>2</sup> Peng Zhang,<sup>2</sup> Joel K. Greenson,<sup>2</sup> Chen Liu,<sup>4</sup> Di Jiang,<sup>5</sup> Elizabeth Virts,<sup>1</sup> Stephanie L. Kelich,<sup>1</sup> Hong Wei Chu,<sup>5</sup> Ryan Flynn,<sup>6</sup> Bruce R. Blazar,<sup>6</sup> Helmut Hanenberg,<sup>1</sup> Samir Hanash,<sup>7</sup> and Sophie Paczesny<sup>1‡</sup>

**Affiliations:** <sup>1</sup>Indiana University School of Medicine, Indianapolis, IN, USA; <sup>2</sup>University of Michigan, Ann Arbor, MI, USA; <sup>3</sup>Fred Hutchinson Cancer Research Center, Seattle, WA, USA; <sup>4</sup>Rutgers-Robert Wood Johnson Medical School, New Brunswick, NJ, USA; <sup>5</sup>National Jewish Health, Denver, CO, USA; <sup>6</sup>University of Minnesota, Minneapolis, MN, USA; <sup>7</sup>MD Anderson Cancer Center, Houston, TX, USA.

\*These authors contributed equally to this work.

‡Corresponding author. E-mail: [sophpacz@iu.edu](mailto:sophpacz@iu.edu)

**This PDF file includes:**

Supplemental Figure 1. Conventional T cells (Tcons) and Tregs gating strategy.

Supplemental Figure 2. Absolute lymphocyte counts and correlation of CD4+CD146+CCR5+ T-cell counts and frequencies of CD4+CD146+CCR5+ T cells in PB of HCT patients.

Supplemental Figure 3. Frequencies of CD4+CD146+ T cells and CD4+CCR5+ T cells in PB of HCT patients.

Supplemental Figure 4. CD146 expression on CD4 and CD8 T cells in PB of healthy donors and GI-GVHD patients.

Supplemental Figure 5. Receiver operating characteristic (ROC) curve comparing GI-GVHD versus non-GVHD enteritis HCT patients.

Supplemental Figure 6. CD4+CD146+CCR5+ T-cell frequency stratified by maximum GI-GVHD stage.

Supplemental Figure 7. CD4+CD146+CCR5+ T-cell frequency by Reg3 $\alpha$  in PB and ST2 plasma concentrations, GI symptom localization, and GI-GVHD histologic grade.

Supplemental Figure 8. The frequency of CD4+CD146+CCR5+ T-cell subset in HCT patients by day post-HCT of sampling.

Supplemental Figure 9. Expression of Th1-transcription factor TBET in CD4+CD146+CCR5+ T-cell subset versus T cells excluding this population in GI-GVHD patients.

Supplemental Figure 10. CD4+ CD146+CCR5+ T-cell effector memory phenotype.

Supplemental Figure 11. CD4+CD146+CCR5+ T-cell generation in allogeneic mixed lymphocyte reactions (MLRs).

Supplemental Figure 12. Th17-associated markers in ICOS-stimulated Th17 cells and CD4+CD146+CCR5+ T cells.

Supplemental Figure 13. Frequencies of CD146+CCR5+-expressing T cells among ICOS-stimulated CD8 T cells and Tcons.

Supplemental Figure 14. Th17- proneness of sorted CD146+ versus CD146- Tcons.

Supplemental Figure 15. Epithelial CCL14 expression in colonic biopsies of GI-GVHD and non-GVHD enteritis patients post-HCT.

Supplemental Figure 16. CD146 KO donor T cells did not affect GVHD as compared to WT T cells in major and minor mismatched MHC murine GVHD models.

Supplemental Figure 17. CD146 expression on CD146 shRNA-transduced CD4 T cells on the day of transplantation and 45 days post-transplantation.

Supplemental Figure 18. Absolute counts of intestinal CD4+CD146+CCR5+ T cells in

xenogeneic GVHD with control shRNA or CD146 shRNA knockdown.

Supplemental Figure 19. In vivo coexpression of IL-17 and IFN- $\gamma$  by CD4+CD146+CCR5+ T cells in xenogeneic GVHD mice.

Supplemental Figure 20. Frequencies of CD25+CD127-FOXP3+ on CD4 T cells in PB of allogeneic HCT patients at GVHD onset.

Supplemental Figure 21. Expression of IFN- $\gamma$ , IL-17, and PD-1 proteins in Treg subsets.

Supplemental Figure 22. Suppressive activity of CD28- and ICOS-expanded Tregs.

Supplemental Table 1. Proteins discovered in proteomics analysis.

Supplemental Table 2: Study patients' characteristics.

Supplemental Table 3. Causes of non-GVHD enteritis in the validation set.

Supplemental Table 4. Transcriptome analysis of sorted human CD146+CCR5+ Tcons and T-cell population excluding CD146+CCR5+ Tcons.

Supplemental Table 5. Th17 stemness transcripts in CD4+CD146+CCR5+ T cells.

Supplemental Table 6. CD146 on T cells and vessels in GI biopsies of GI-GVHD and non-GVHD enteritis post-HCT.

Supplemental Table 7. Transcriptome analysis of sorted human CD146+CCR5+ Tregs and T-cell population excluding CD146+CCR5+ Tregs.

Supplemental Table 8. Transcriptional signature for pathogenic Th17 cells of CD146+CCR5+ Tcons in comparison with published work.

**Supplemental Figures:**

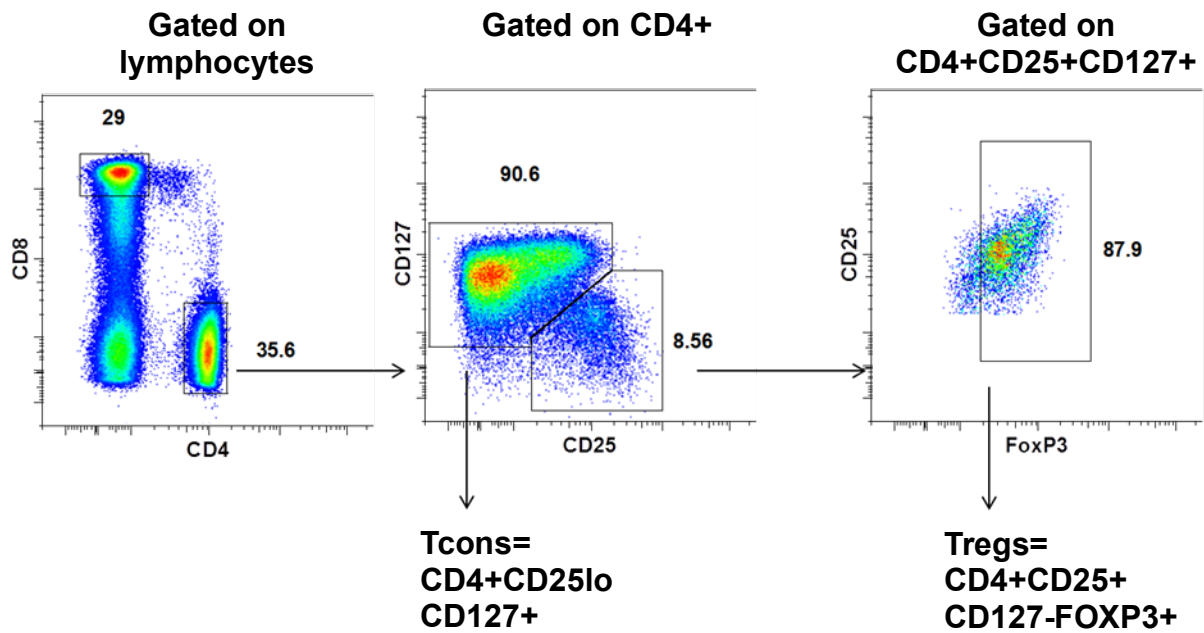

**Supplemental Figure 1. Conventional T cell (Tcons) and Treg gating strategy.** Tcons were defined as CD4+CD25<sup>lo</sup>CD127<sup>+</sup>, whereas Tregs were defined as CD4+CD25+CD127<sup>-</sup>FoxP3<sup>+</sup>.

**A**

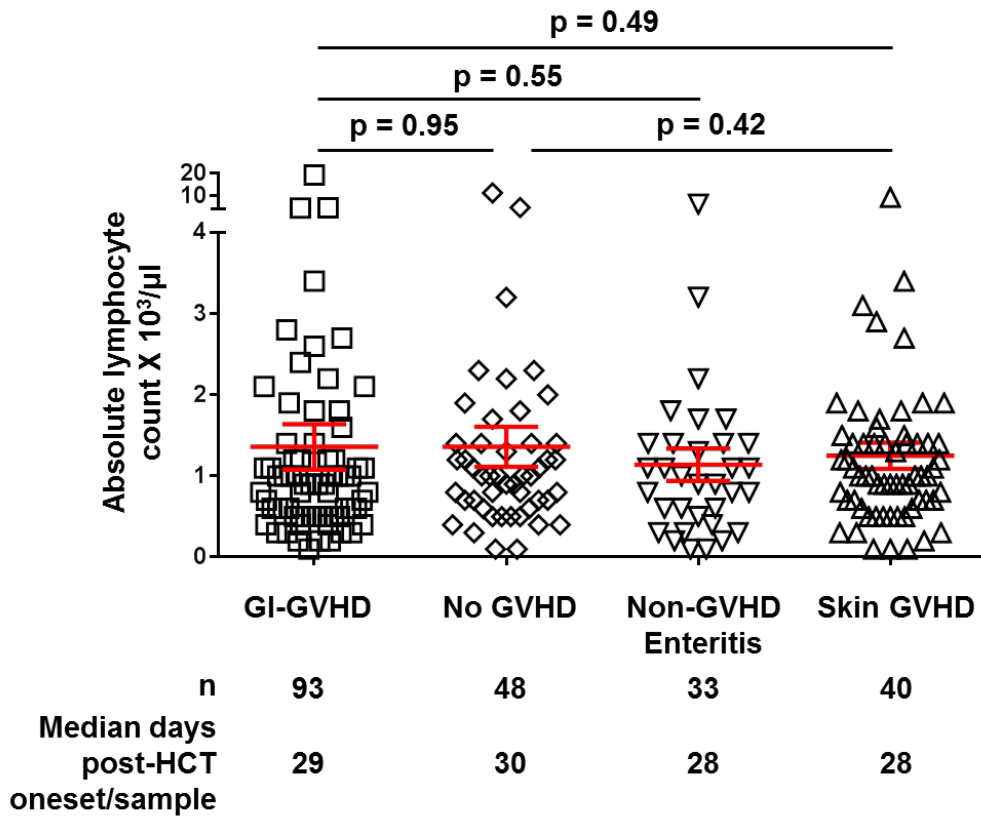

**B**

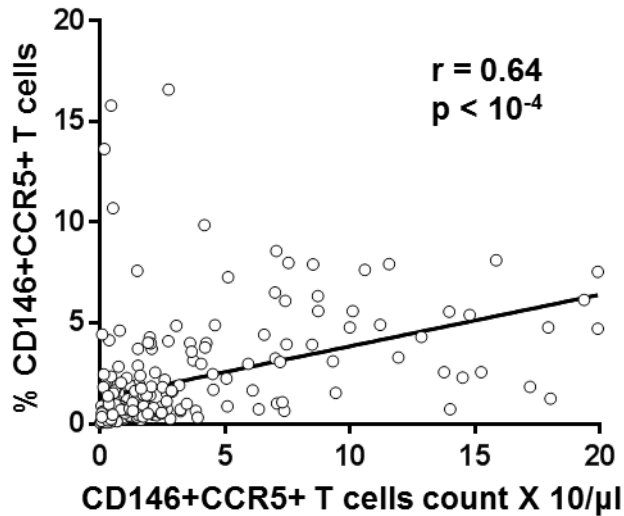

**Supplemental Figure 2. Absolute lymphocyte counts and correlation of CD4+CD146+CCR5+ T-cell counts and frequencies of CD4+CD146+CCR5+ T cells in PB of HCT patients. (A)** Absolute lymphocyte counts in PB of allogeneic patients following HCT as measured by multicolor flow cytometry. Data represent mean±SEM, 2-tailed Student's t-test. **(B)** Correlation of CD4+CD146+CCR5+ T-cell counts and frequencies of CD4+CD146+CCR5+ T cells in PB samples of all 214 HCT patients. The Spearman correlation coefficient was used.

**A**

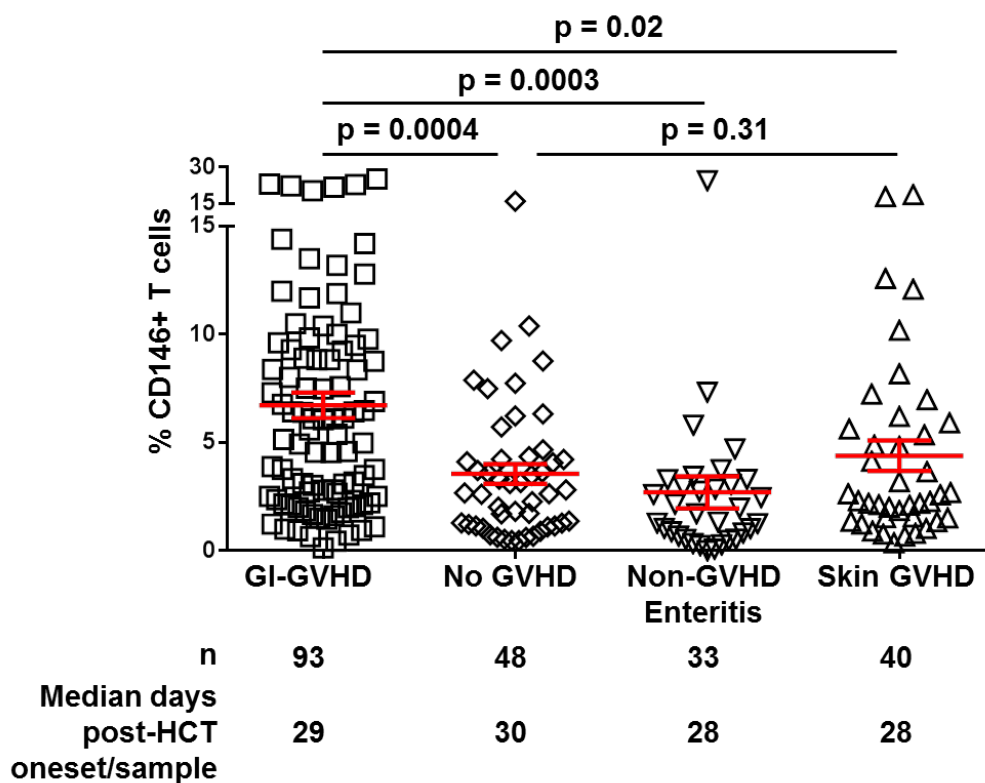

**B**

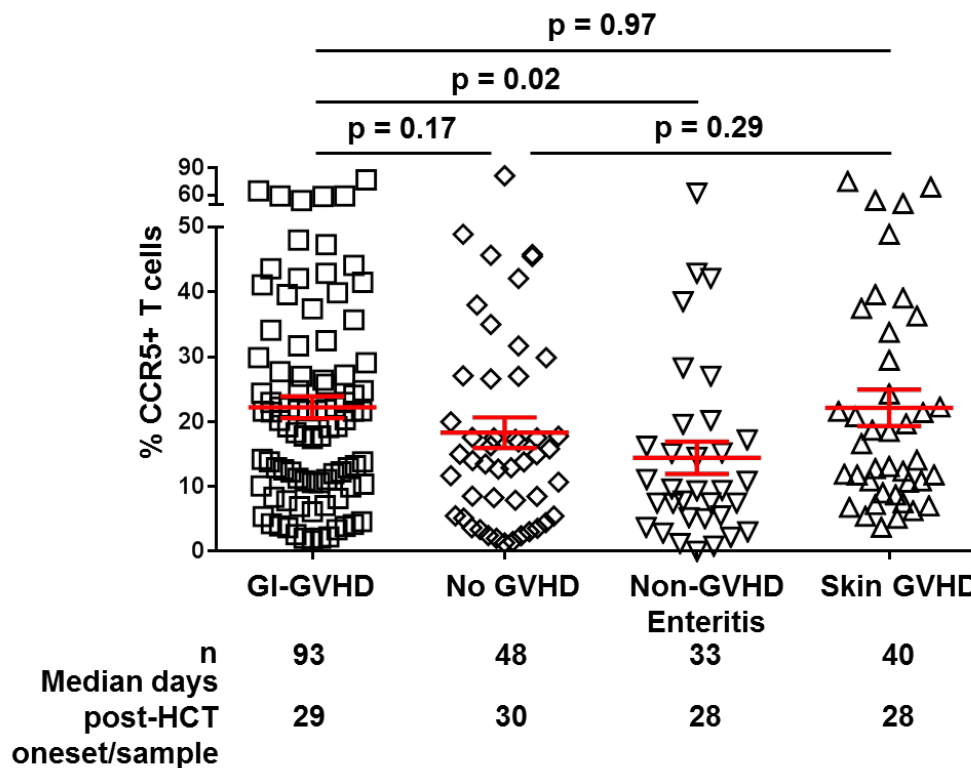

**Supplemental Figure 3. Frequencies of CD4+CD146+ T cells and CD4+CCR5+ T cells in PB of HCT patients.** Frequencies of (A) CD4+CD146+ T cells and (B) CD4+CCR5+ T cells in allogeneic patients following HCT. Data represent mean±SEM, and differences were analyzed using 2-tailed Student's t-test.

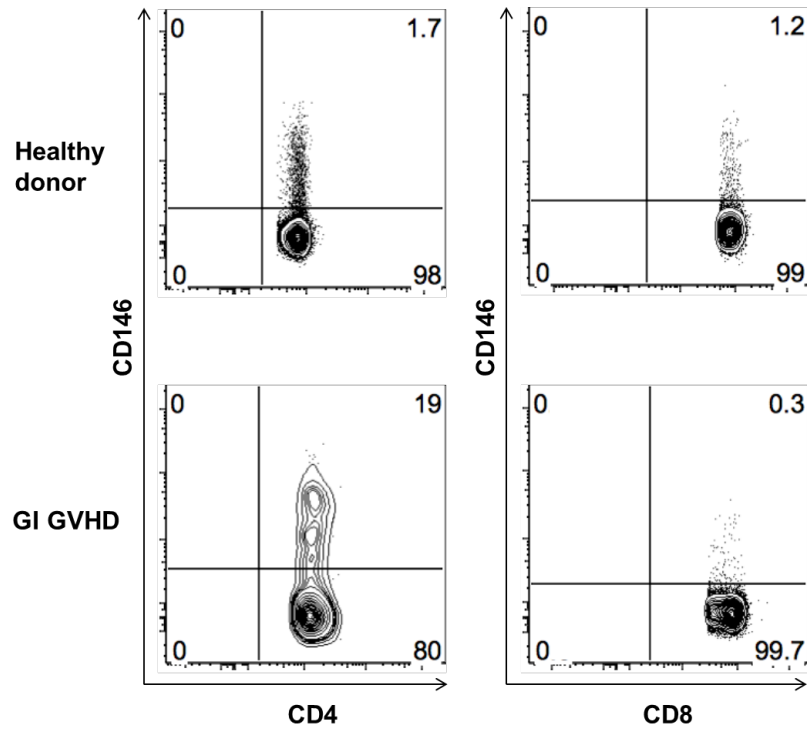

**Supplemental Figure 4. CD146 expression on CD4 and CD8 T cells in PB of healthy donors and GI-GVHD patients.** Representative plots showing the frequencies of CD146 expressing CD4 and CD8 T cells in PB of healthy donors (top panel) and GI-GVHD patients (bottom panel) (n=7).

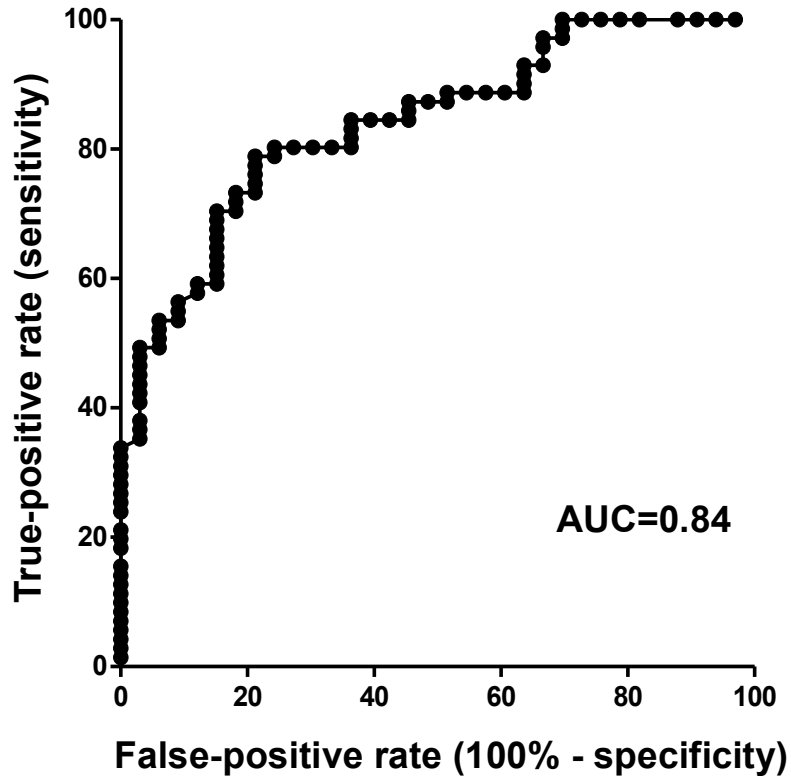

**Supplemental Figure 5. Receiver operating characteristic (ROC) curve comparing GI-GVHD versus non-GVHD enteritis HCT patients. ROC curve for CD4+CD146+CCR5+ T-cell frequency between GI GVHD (n=71) and non-GVHD enteritis (n=33), AUC=0.84.**



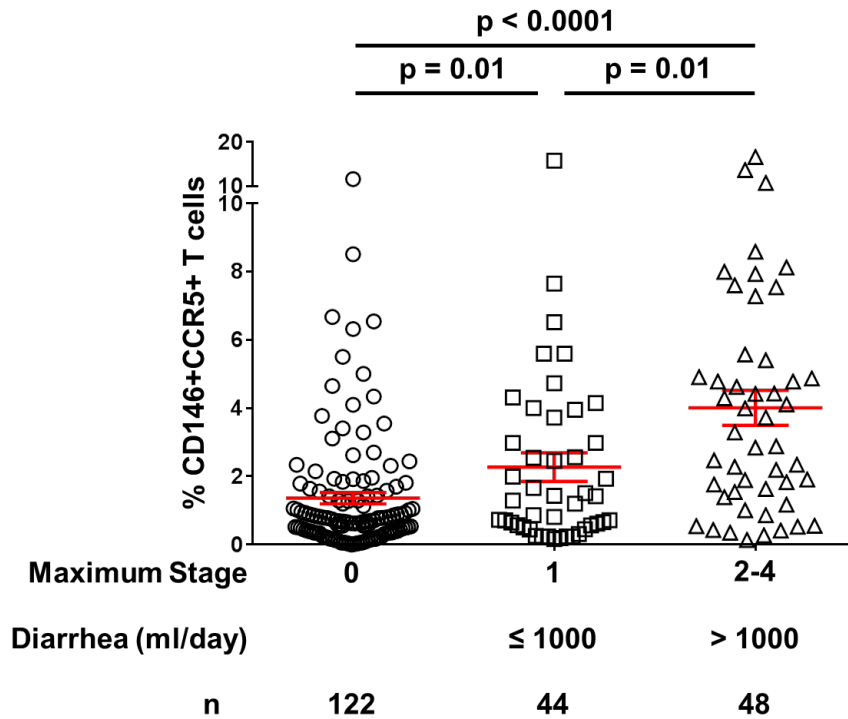

**Supplemental Figure 6. CD4+CD146+CCR5+ T-cell frequency stratified by maximum GI-GVHD stage.** GI-GVHD patients who had  $\leq 1$  l of stool per day were categorized stage 1, and those with  $>1$  l as stage 2–4. Stage 0 at onset includes isolated skin GVHD patients, non-GVHD enteritis, and patients without GVHD. Data represent mean $\pm$ SEM, 2-tailed Student's t-test.

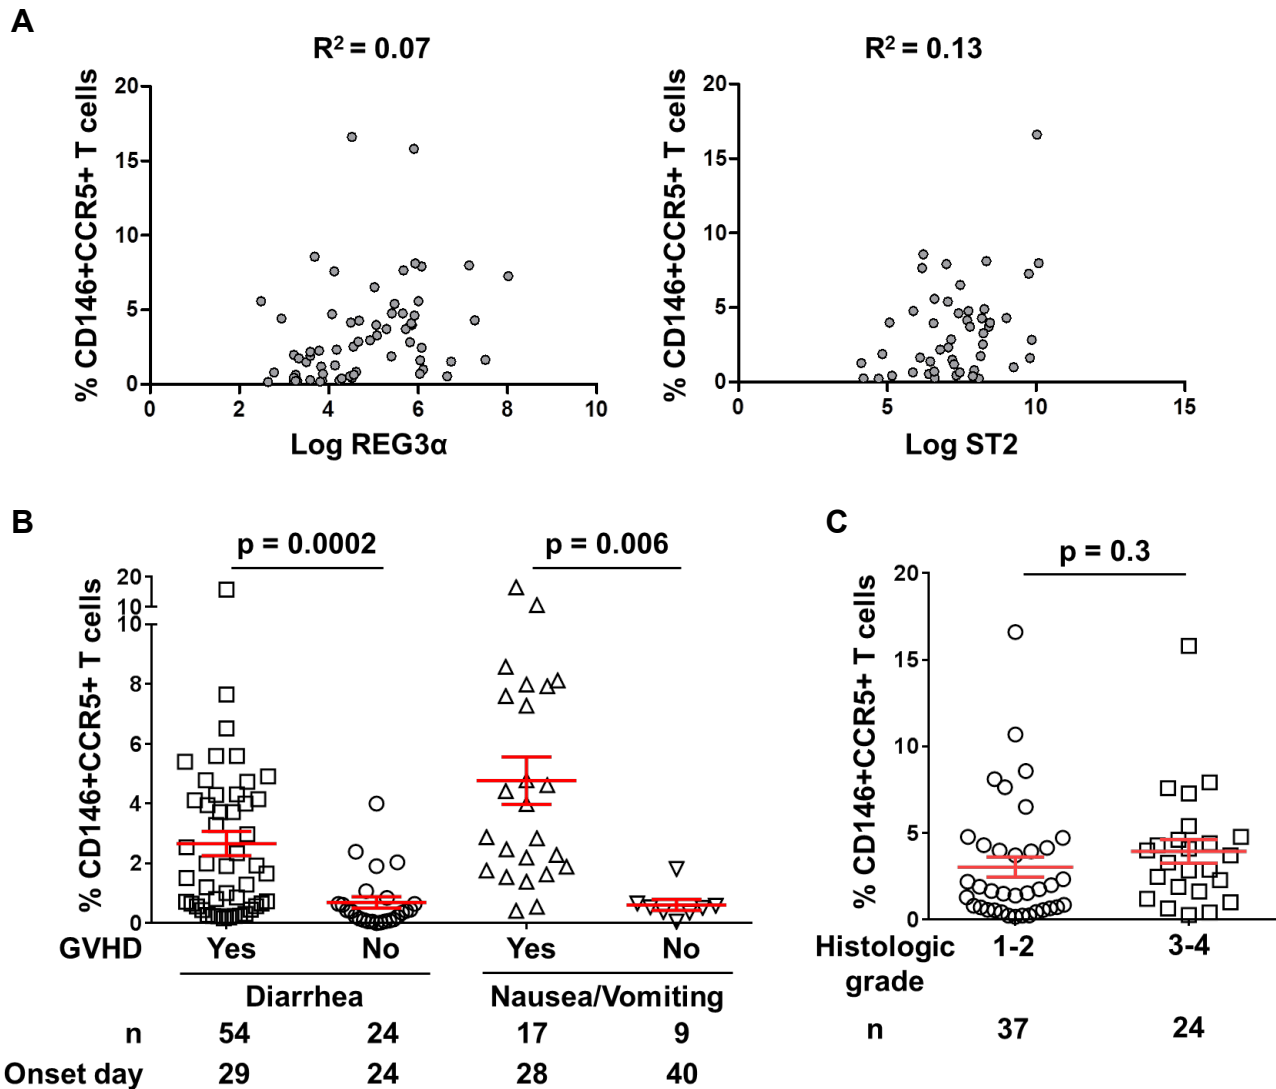

**Supplemental Figure 7. CD4+CD146+CCR5+ T-cell frequency in PB by REG3 $\alpha$  and ST2 plasma concentrations, GI symptom localization, and GI-GVHD histologic grade. (A)** Correlation of REG3 $\alpha$  and ST2 plasma concentrations with CD4+CD146+CCR5+ T-cell frequency in PB of patients with GI-GVHD. The squared Pearson correlation coefficient was used. **(B)** CD4+CD146+CCR5+ T-cell frequency classified by GI symptom localization, 2-tailed Student's t-tests. **(C)** CD4+CD146+CCR5+ T-cell frequency stratified by GI-GVHD histologic grade, 2-tailed Student's t-test.

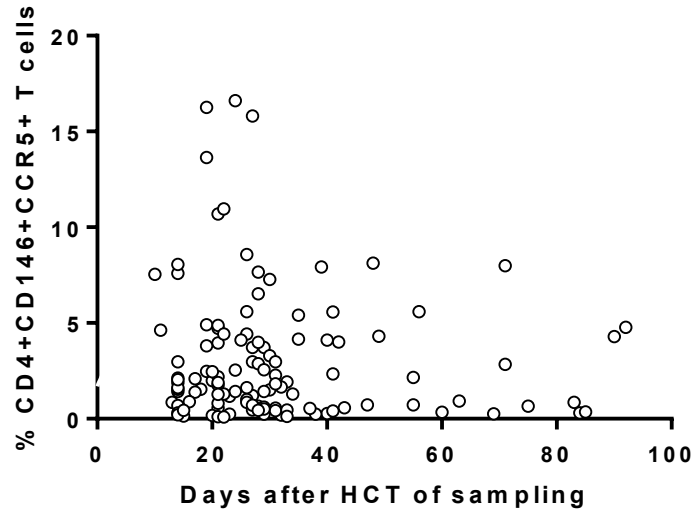

**Supplemental Figure 8. The frequency of CD4+CD146+CCR5+ T-cell subset in HCT patients over time post-HCT.** The percentages of the CD4+CD146+CCR5+ T cells in 124 GI-GVHD patients (in samples collected from 93 patients at onset and 31 pre-onset samples collected from day 14 to day 92 post-HCT).

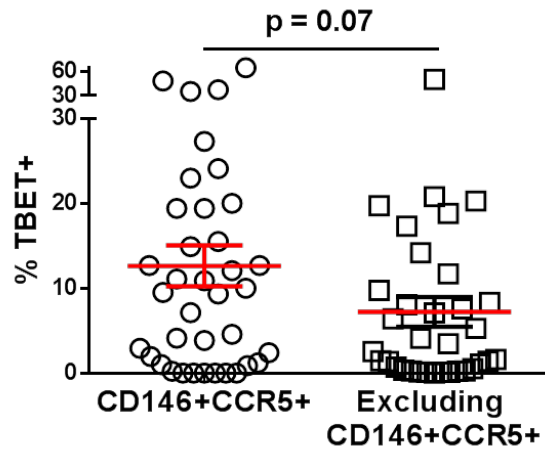

**Supplemental Figure 9. Expression of Th1-transcription factor TBET in CD4+CD146+CCR5+ T-cell subset versus T cells excluding this population in GI-GVHD patients.** Intracellular staining for Th1-transcription factor TBET in samples of GI-GVHD patients (n=35), 2-tailed Student's t-test.

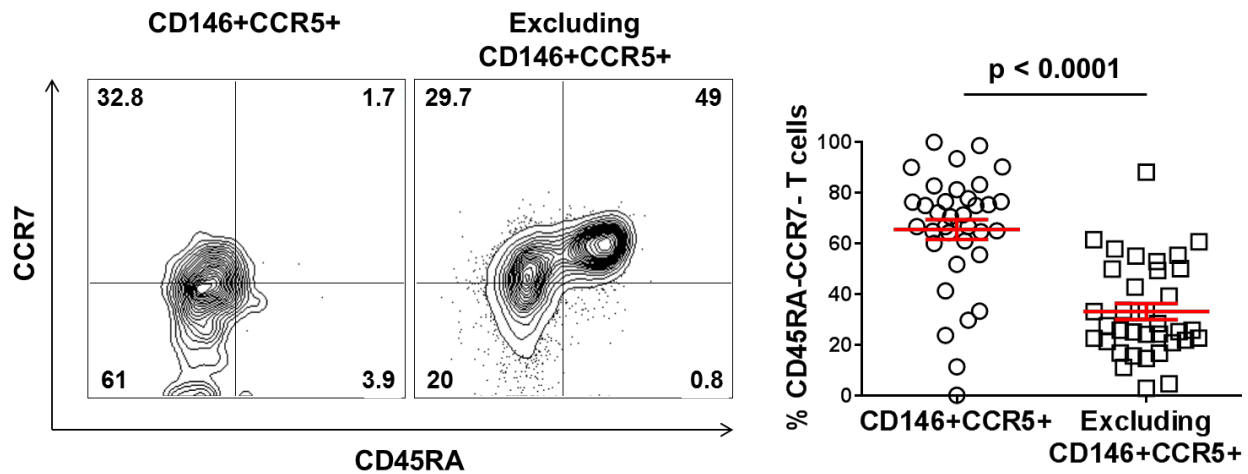

**Supplemental Figure 10. CD4+CD146+CCR5+ T-cell effector memory phenotype.** Representative plot showing the expression of CD45RA and CCR7 on HCT patient T cells gated on the CD4+CD146+CCR5+ T-cell population or excluding this population, and a dot plot depicting mean $\pm$ SEM values for the frequencies of CD45RA-CCR7- cells in the same subsets in patient samples (n=35), 2-tailed Student's t-test.

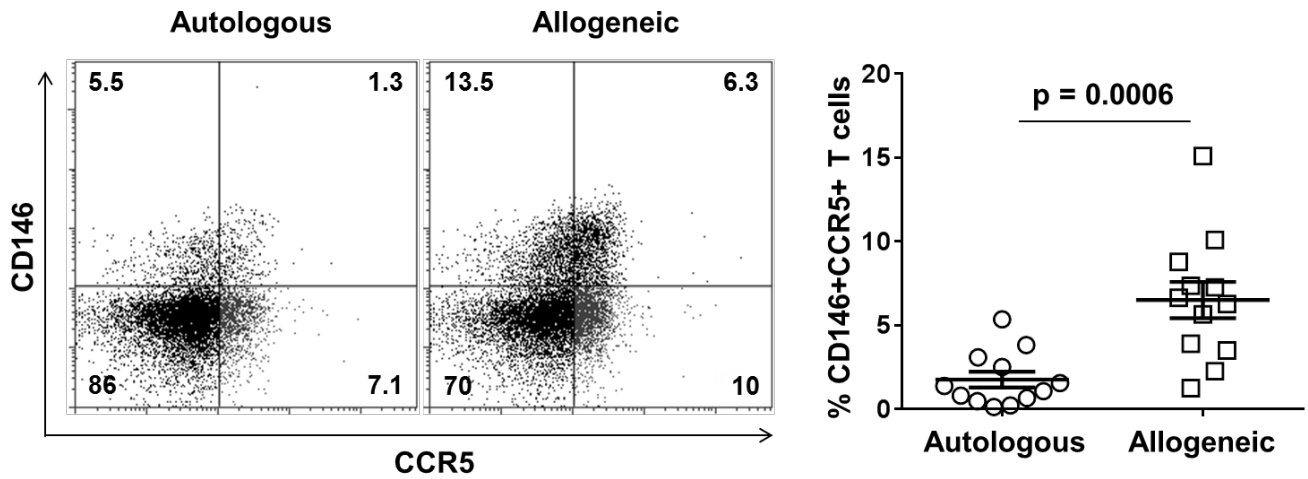

**Supplemental Figure 11. CD4+CD146+CCR5+ T-cell generation in allogeneic mixed lymphocyte reactions (MLRs).** Representative plots showing the expression of CD146 and CCR5 on CD4 T cells from autologous and allogeneic MLRs, and a dot plot depicting mean±SEM of the frequency of CD4+CD146+CCR5+ T cells (n=12), 2-tailed Student's t-test.

**A**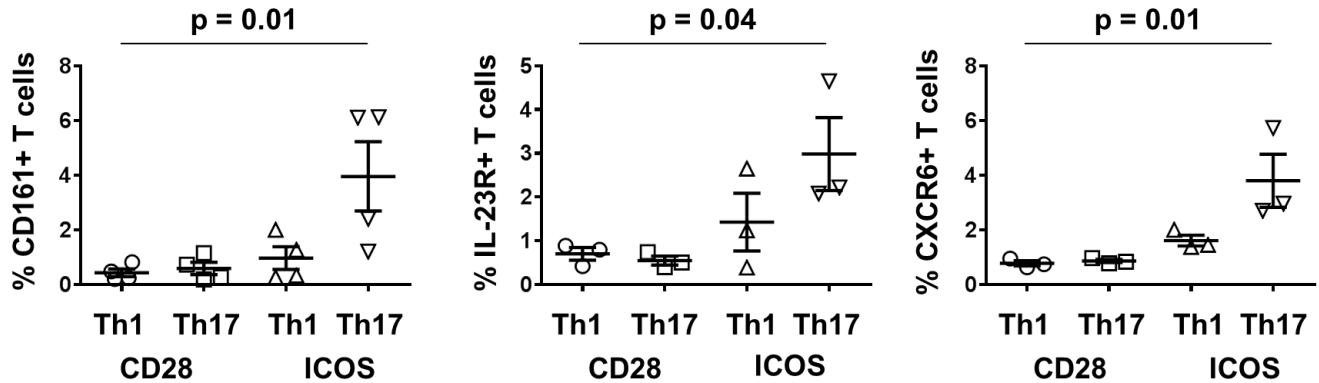**B**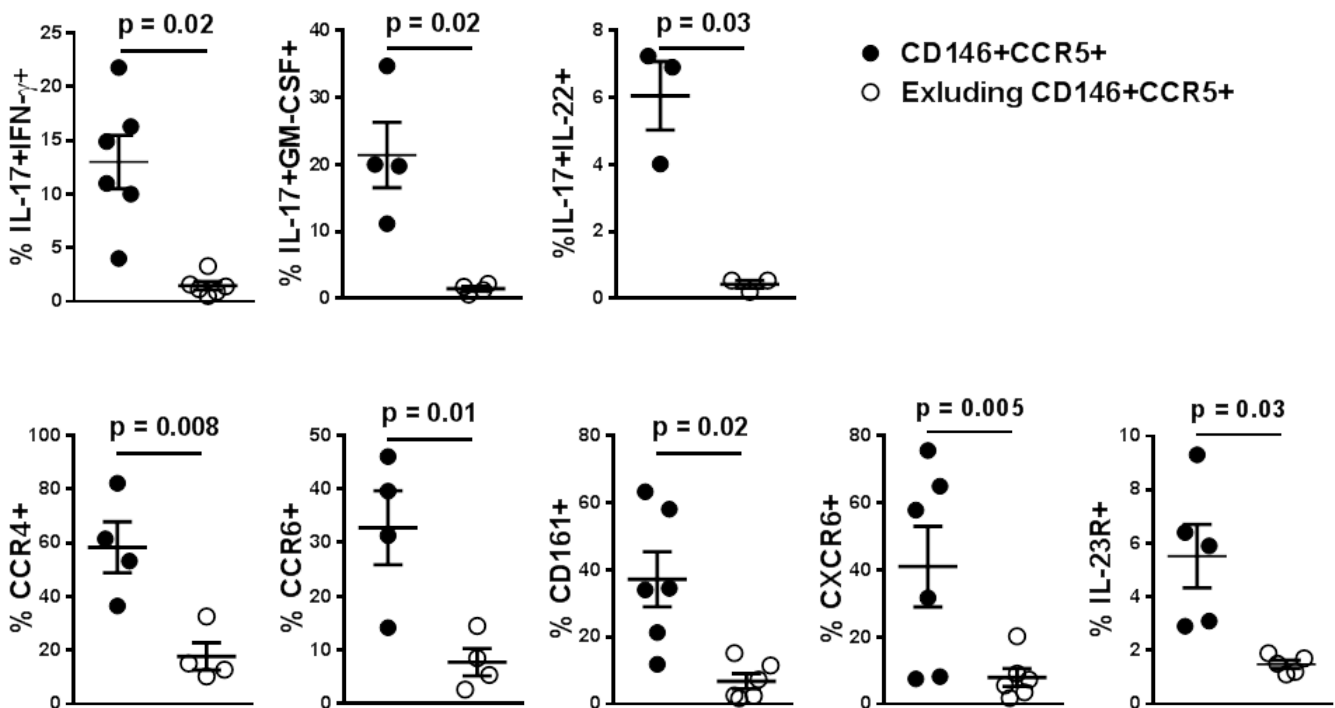

**Supplemental Figure 12. Th17-associated markers in ICOS-stimulated Th17 cells and CD4+CD146+CCR5+ T cells. (A)** Frequencies of CD161-, IL-23R- or CXCR6-expressing T cells after CD28 and ICOS stimulation with Th1 or Th17 differentiation. Summary data are presented as mean  $\pm$  SEM (n=3), one-way ANOVA. **(B)** Frequencies of Th17-associated markers in the CD4+CD146+CCR5+ double-positive cells as compared to in T cells excluding this population. Tcons were stimulated with anti-CD3/ICOS beads for 7 days under Th17-polarizing conditions. Summary data are presented as mean  $\pm$  SEM (n=3 for IL-17+IL-22+; n=4 for IL-17+GM-CSF+, CCR4+, and CCR6+; n=5 for IL-23R+; n=6 for IL-17+IFN- $\gamma$ +, CD161+, and CXCR6+), paired t-test.

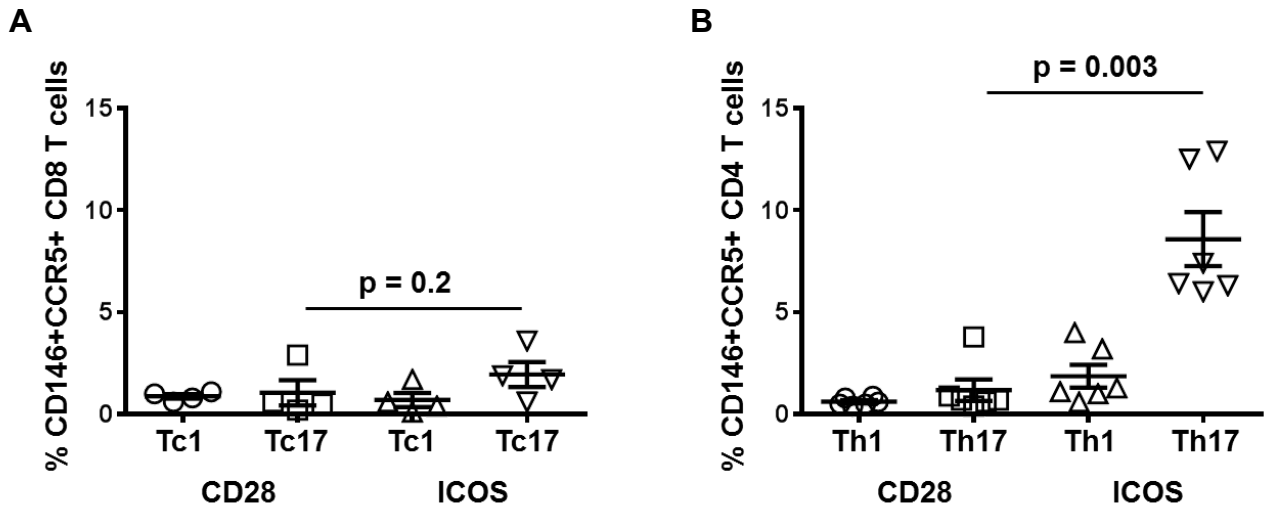

**Supplemental Figure 13. Frequencies of CD146+CCR5+-expressing T cells among ICOS-stimulated CD8 cells and Tcons.** (A) CD8 T cells and (B) Tcons were isolated from healthy donor PB cells and cultured in the presence of anti-CD3/CD28 or anti-CD3/ICOS beads under T cytotoxic (Tc) 1 or Tc17 (A) or Th1 or Th17 (B) polarizing conditions for 7 days. The frequencies of CD8+CD146+CCR5+ T cells and CD4+CD146+CCR5+ T cells are presented as mean±SEM (n=4 for CD8 cells and n=6 for Tcons), one-way ANOVA.



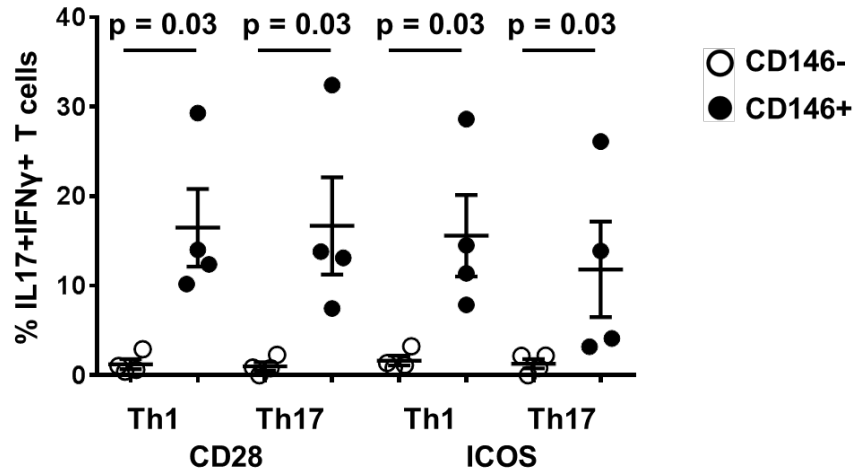

**Supplemental Figure 14. Th17 proneness of sorted CD146+ versus CD146- Tcons.** Mature CD146- and CD146+ T cells were isolated from total CD4 T cells and activated with anti-CD3/CD28 or anti-CD3/ICOS beads under Th1 or Th17 polarizing conditions for 7 days. The frequencies of IL-17+IFN- $\gamma$ + T cells are shown as mean $\pm$ SEM (n=4), two-tailed Student's t-test.

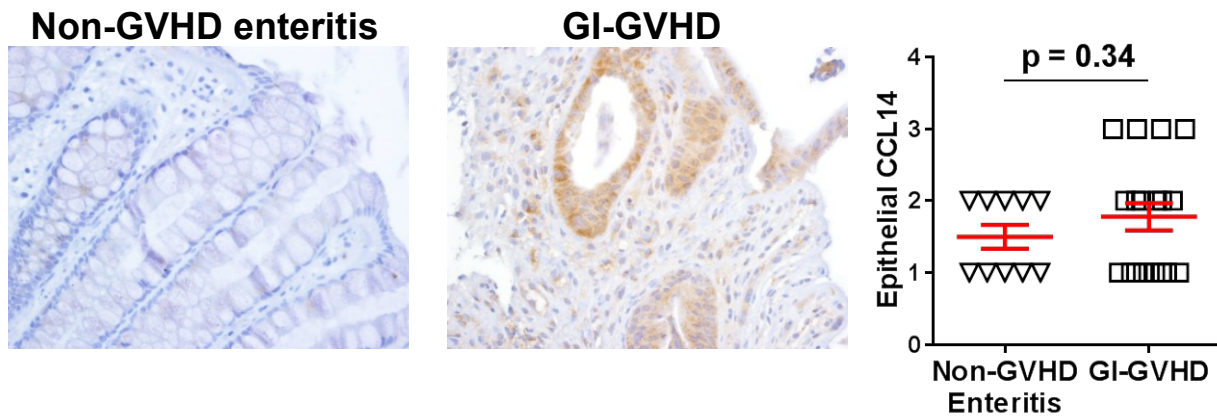

**Supplemental Figure 15. Epithelial CCL14 expression in colonic biopsies of GI-GVHD and non-GVHD enteritis patients post-HCT.** Immunohistochemical analysis of colonic biopsies taken at onset of symptoms from non-GVHD enteritis patients (left panel) and GI-GVHD patients (right panel) for CCL14 expression (magnification,  $\times 200$ ). Dot plot showing mean $\pm$ SEM values for CCL14 intensity of epithelial staining X40, two-tailed Student's t-test from non-GVHD enteritis patients (n=10) and GI-GVHD patients (n=18).

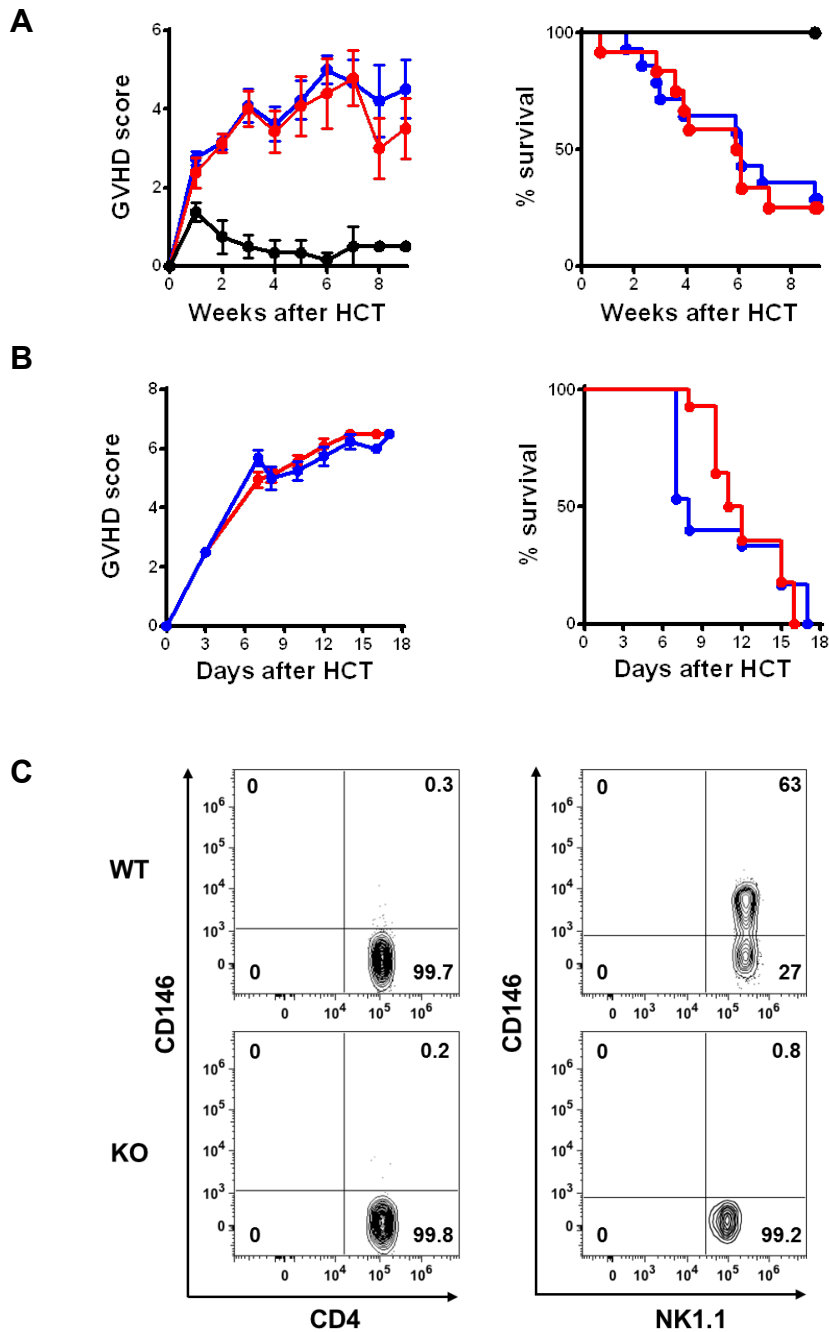

**Supplemental Figure 16. CD146 KO donor T cells did not affect GVHD as compared to WT T cells in major and minor mismatched MHC murine GVHD models. (A)** Clinical scores of GVHD and survival curves for C3H.SW mice transplanted with syngeneic BM and T cells (●) or allogeneic B6 BM cells and WT (●) or CD146 KO (●) splenic T cells (n=13-16 per group; p value for survival=0.81; Log-rank test for survival analysis). **(B)** Clinical scores of GVHD and survival curves for Balb/C recipient mice transplanted with B6 BM cells plus either WT (●) or CD146 KO B6 (●) T cells. (n=12-13 per group; p value for survival=0.89 Log-rank test for survival analysis). **(C)** Representative flow cytometric analysis of CD146 expression on gated WT or CD146 KO splenic CD4 T cells or NK cells.

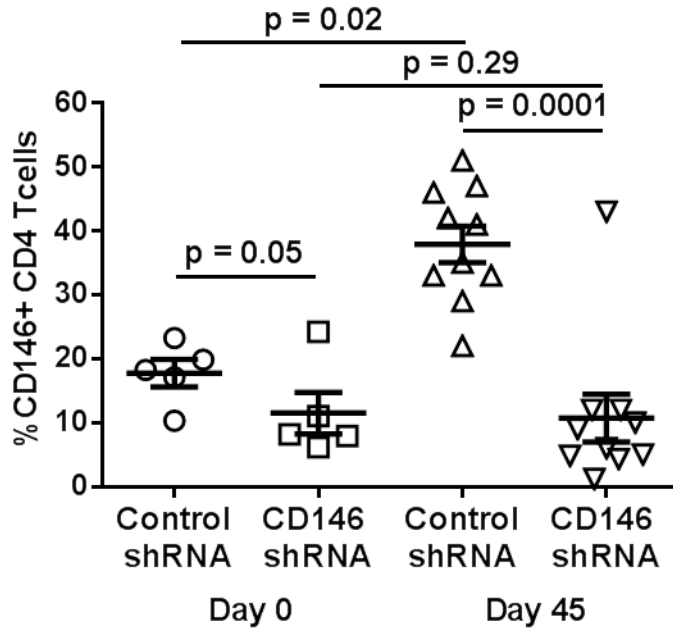

**Supplemental Figure 17. CD146 expression on CD146 shRNA-transduced CD4 T cells at the day of transplantation and 45 days post-transplantation.** CD4 T cells transduced with CD146 shRNA and control shRNA were analyzed for CD146 expression at the time of transplantation (D0, n=5) and 45 days after transplantation (D45, n=10) into sublethally-irradiated NSG recipient mice. The data are shown as mean±SEM for the frequencies of CD146-expressing CD4 T cells, paired t-test.



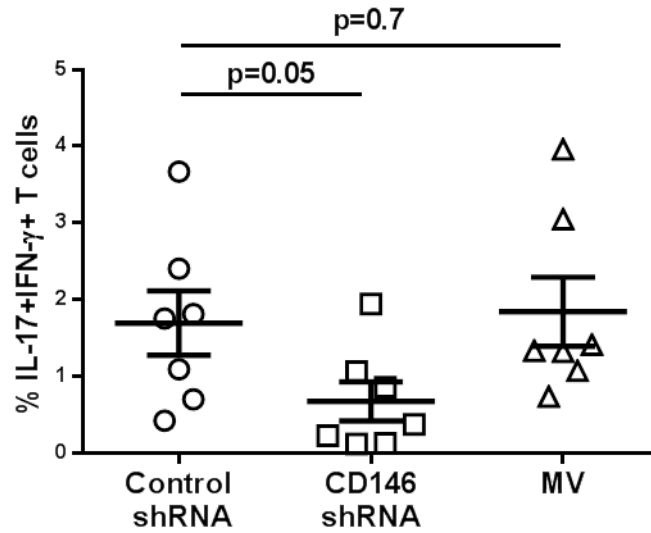

**Supplemental Figure 19. In vivo coexpression of IL-17 and IFN- $\gamma$  by CD4+CD146+CCR5+ T cells in xenogeneic GVHD mice.** Sublethally irradiated NSG mice were transplanted with human CD4 T cells transduced with CD146 shRNA or control shRNA lentivirus or control shRNA lentivirus with additional treatment with maraviroc (MV). Mice were analyzed for the expression of IL-17 and IFN- $\gamma$  on gated CD146+CCR5+ splenic CD4 T cells between days 30–45 after transplantation. The data are shown as mean $\pm$ SEM for the frequencies of IL-17+IFN- $\gamma$ + T cells (n=7), paired t-test.

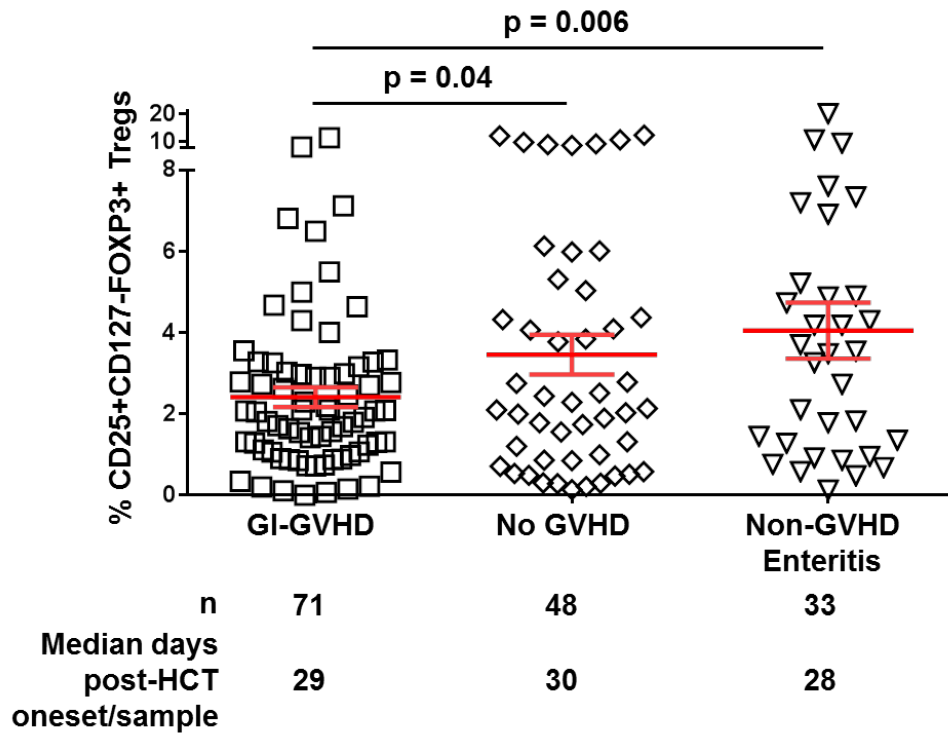

**Supplemental Figure 20. Frequencies of CD25+CD127-FOXP3+ on CD4 T cells in PB of allogeneic HCT patients at GVHD onset.** CD4+CD25+CD127-FOXP3+ Treg frequencies in PB of patients with GI-GVHD, without GVHD, and with non-GVHD enteritis. N and median days post-HCT onset of signs or samples are shown below the graphs. The data are shown as mean±SEM, 2-tailed Student's t-test.

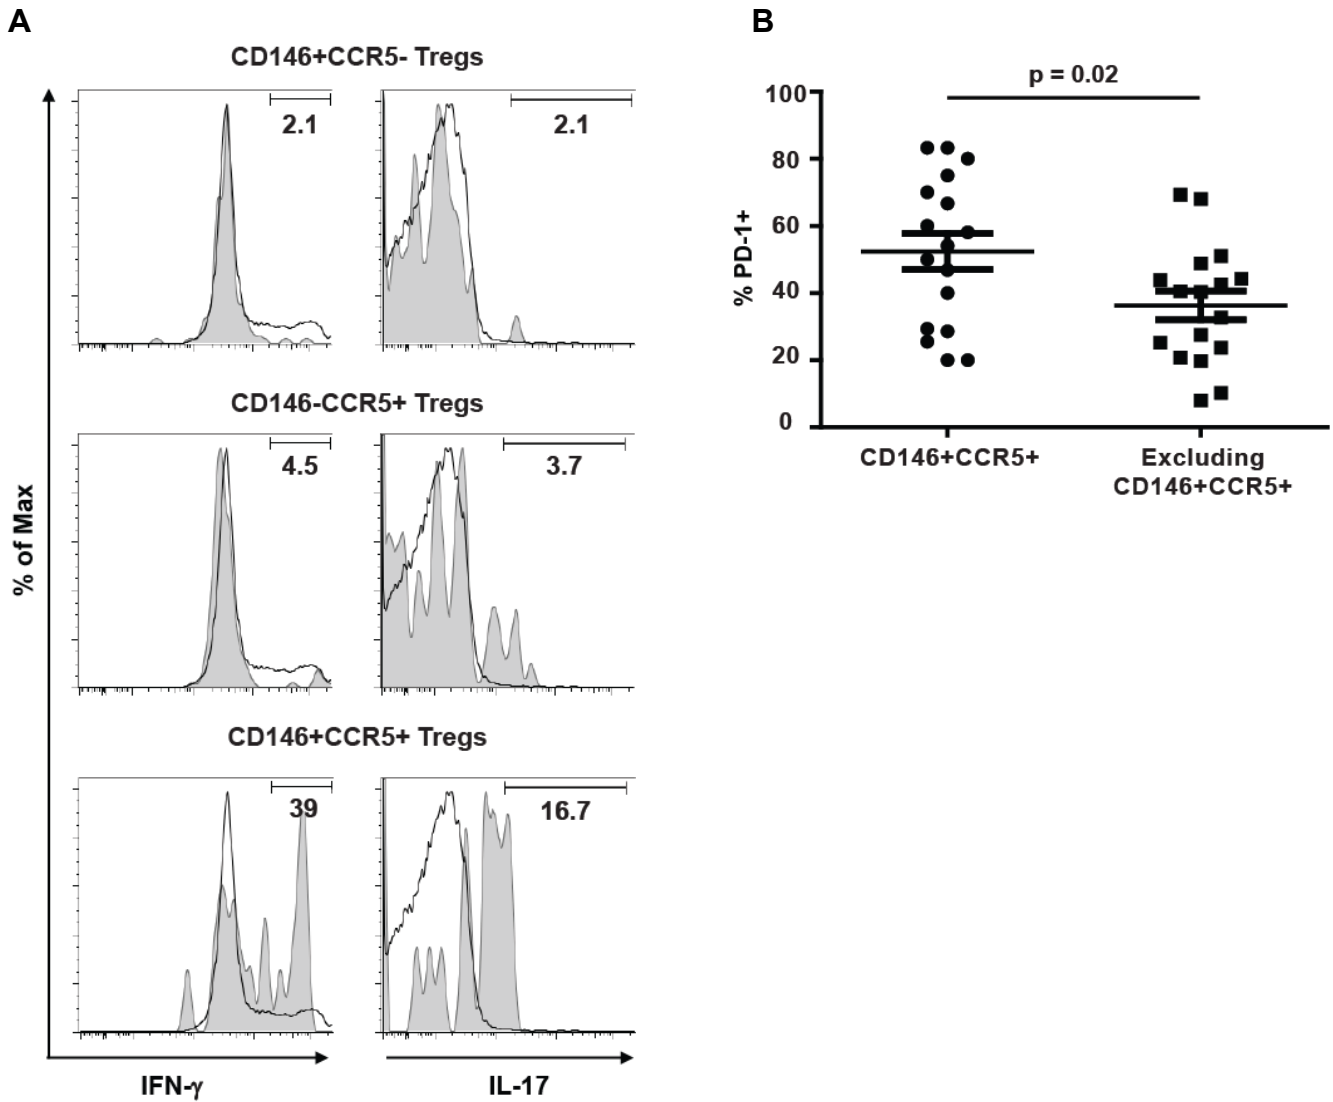



## Tregs: Tconvs

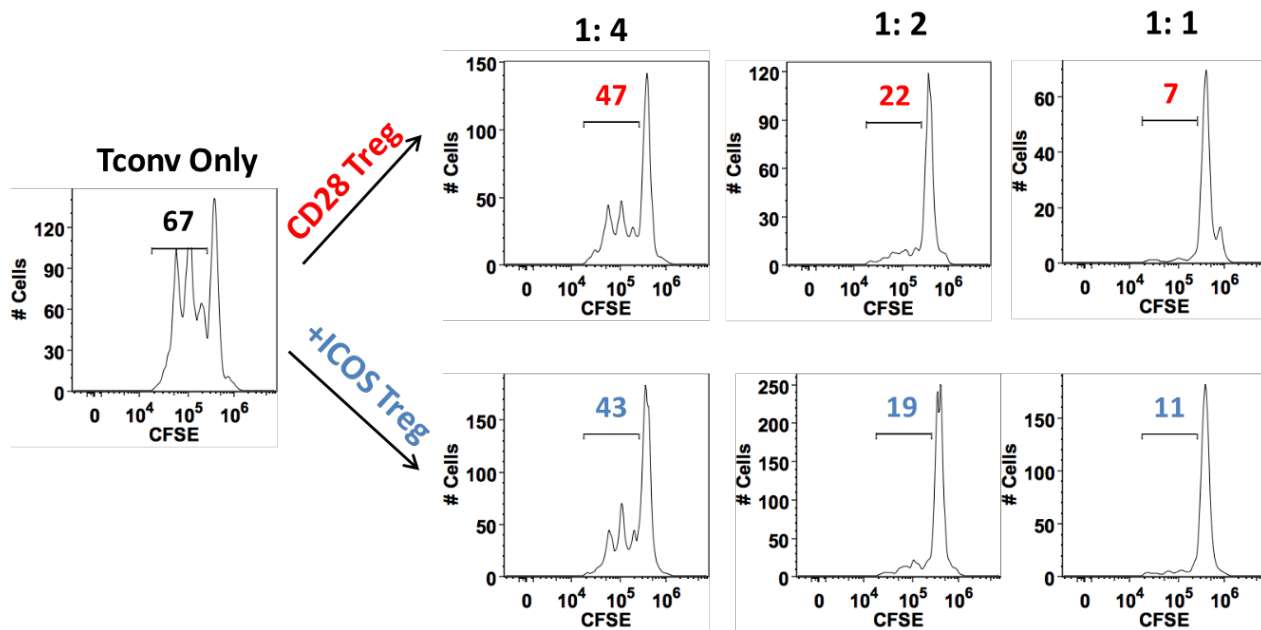

**Supplemental Figure 22. Suppressive activity of CD28 and ICOS expanded Tregs.** CFSE-labelled Tcons were activated with anti-CD3/CD28 beads in the presence of anti-CD3/CD28 or anti-CD3/ICOS expanded Tregs at indicated ratios. After 3 days of culture, the proliferation of the responder Tcons was measured by gating on the proliferated cells.

**Supplemental Table 1. Proteins discovered in proteomics analysis**

| <b>International Protein Index</b> | <b>Gene Name</b> | <b>Gene description</b>                                                          | <b>Ratio Heavy/light</b> |
|------------------------------------|------------------|----------------------------------------------------------------------------------|--------------------------|
| IPI00031608                        | SPATA5L1         | spermatogenesis-associated protein 5-like protein 1.                             | 85.19                    |
| IPI00023635                        | IMPA2            | isoform 1 of inositol monophosphatase 2.                                         | 34.95                    |
| IPI00216003                        | CUL5             | cullin homolog 5.                                                                | 18.23                    |
| IPI00184190                        | ENOSF1           | orf1a.                                                                           | 14.75                    |
| IPI00783169                        | F12              | coagulation factor xii.                                                          | 14.14                    |
| IPI00004922                        | CMA1             | chymase.                                                                         | 10.97                    |
| IPI00151888                        | DOCK9            | isoform 1 of dedicator of cytokinesis protein 9.                                 | 9.65                     |
| IPI00741710                        | SNED1            | similar to secreted nidogen domain protein.                                      | 8.91                     |
| IPI00017817                        | APBA2            | amyloid beta a4 precursor protein-binding family a member 2.                     | 8.74                     |
| IPI00059238                        | SPSB4            | spry domain-containing socs box protein 4.                                       | 8.42                     |
| IPI00465428                        | VPS13C           | isoform 1 of vacuolar protein sorting-associated protein 13c.                    | 7.63                     |
| IPI00002311                        | SCRN3            | secernin-3.                                                                      | 7.39                     |
| IPI00472035                        | MICA             | isoform 2 of hla class i histocompatibility antigen, cw-16 alpha chainprecursor. | 7.02                     |
| IPI00013897                        | ADAM10           | adam 10 precursor.                                                               | 6.37                     |
| IPI00301163                        | KTELC1           | ktel motif-containing protein 1 precursor.                                       | 5.89                     |
| IPI00010414                        | PDLIM1           | pdz and lim domain protein 1.                                                    | 5.58                     |
| IPI00178352                        | FLNC             | isoform 1 of filamin-c.                                                          | 5.55                     |
| IPI00180434                        | GRAMD1A          | isoform 1 of gram domain-containing protein 1a.                                  | 5.19                     |
| IPI00306369                        | NSUN2            | nol1/nop2/sun domain family 2 protein.                                           | 4.67                     |
| IPI00105532                        | LLGL1            | lethal giant larvae homolog 1.                                                   | 4.63                     |
| IPI00401073                        | IER5L            | immediate early response 5-like protein.                                         | 4.60                     |
| IPI00019272                        | SOST             | isoform 1 of sclerostin precursor.                                               | 4.34                     |
| IPI00100753                        | NMUR2            | neuromedin-u receptor 2.                                                         | 4.24                     |
| IPI00299778                        | PON3             | serum paraoxonase/lactonase 3.                                                   | 3.89                     |
| IPI00218976                        | FTCD             | isoform c of formimidoyltransferase-cyclodeaminase.                              | 3.88                     |
| IPI00022470                        | ZNF516           | similar to zinc finger protein 516.                                              | 3.47                     |
| IPI00166980                        | KIF26A           | similar to cg14535-pa.                                                           | 3.41                     |
| IPI00219018                        | GAPDH            | glyceraldehyde-3-phosphate dehydrogenase.                                        | 3.16                     |
| IPI00031171                        | IL6R             | isoform 1 of interleukin-6 receptor alpha chain precursor.                       | 3.12                     |
| IPI00375592                        | ESPNL            | espin-like protein.                                                              | 3.06                     |
| IPI00022445                        | PPBP             | platelet basic protein precursor.                                                | 2.93                     |
| <b>IPI00003375</b>                 | <b>CCL14*</b>    | <b>isoform hcc-1 of small inducible cytokine a14 precursor.</b>                  | <b>2.90</b>              |
| IPI00010779                        | TPM4             | isoform 1 of tropomyosin alpha-4 chain.                                          | 2.85                     |
| IPI00106808                        | TMEM176B         | transmembrane protein 176b.                                                      | 2.79                     |
| IPI00021449                        | ITPKB            | isoform 1 of inositol-trisphosphate 3-kinase b.                                  | 2.72                     |
| IPI00642090                        | DAB2IP           | hypothetical protein (fragment).                                                 | 2.72                     |
| IPI00002127                        | DNAH1            | heat shock regulated-1.                                                          | 2.69                     |
| IPI00163866                        | MGA              | 330 kda protein.                                                                 | 2.63                     |
| IPI00011385                        | LOXL3            | lysyl oxidase homolog 3 precursor.                                               | 2.61                     |
| IPI00026650                        | MICA             | hla class i histocompatibility antigen, cw-1 alpha chain                         | 2.61                     |

|                    |                    |                                                                                     |             |
|--------------------|--------------------|-------------------------------------------------------------------------------------|-------------|
|                    |                    | precursor.                                                                          |             |
| IPI00022446        | PF4                | platelet factor 4 precursor.                                                        | 2.59        |
| IPI00216691        | PFN1               | profilin-1.                                                                         | 2.57        |
| IPI00302592        | FLNA               | filamin a, alpha.                                                                   | 2.56        |
| IPI00103280        | ZDHHC19            | probable palmitoyltransferase zdhhc19.                                              | 2.54        |
| IPI00306311        | PLEK               | pleckstrin.                                                                         | 2.49        |
| IPI00032292        | TIMP1              | metalloproteinase inhibitor 1 precursor.                                            | 2.49        |
| IPI00219910        | BLVRB              | 23 kda protein.                                                                     | 2.38        |
| IPI00021263        | YWHAZ              | 14-3-3 protein zeta/delta.                                                          | 2.35        |
| IPI00030871        | VNN1               | pantetheinase precursor.                                                            | 2.23        |
| IPI00011192        | PRSS27             | serine protease 27 precursor.                                                       | 2.21        |
| IPI00029235        | IGFBP6             | insulin-like growth factor-binding protein 6 precursor.                             | 2.13        |
| IPI00019579        | CFD                | complement factor d precursor.                                                      | 2.11        |
| IPI00216882        | MASP1              | mannan-binding lectin serine protease 1 isoform 3.                                  | 2.08        |
| IPI00297646        | COL1A1             | collagen alpha-1(i) chain precursor.                                                | 2.05        |
| IPI00015029        | PTGES3             | prostaglandin e synthase 3.                                                         | 2.03        |
| IPI00166729        | AZGP1              | alpha-2-glycoprotein 1, zinc.                                                       | 1.96        |
| IPI00011194        | FGFBP2             | fibroblast growth factor-binding protein 2 precursor.                               | 1.91        |
| IPI00181824        | VPS53              | isoform 2 of vacuolar protein sorting-associated protein 53 homolog.                | 1.88        |
| IPI00303482        | FGL1               | fibrinogen-like protein 1 precursor.                                                | 1.87        |
| IPI00011255        | GP1BA              | platelet glycoprotein ib alpha chain precursor.                                     | 1.86        |
| IPI00011832        | SPP2               | secreted phosphoprotein 24 precursor.                                               | 1.85        |
| IPI00018769        | THBS2              | thrombospondin-2 precursor.                                                         | 1.84        |
| IPI00166613        | GALNTL1            | isoform 1 of putative polypeptide n-acetylgalactosaminyltransferase-like protein 1. | 1.84        |
| IPI00297550        | F13A1              | coagulation factor xiii a chain precursor.                                          | 1.82        |
| <b>IPI00016334</b> | <b>MCAM/CD146*</b> | <b>isoform 1 of cell surface glycoprotein muc18.</b>                                | <b>1.81</b> |
| IPI00019442        | GDF1               | embryonic growth/differentiation factor 1 precursor.                                | 1.81        |
| IPI00023673        | LGALS3BP           | galectin-3-binding protein precursor.                                               | 1.80        |
| IPI00026249        | ZNF117             | zinc finger protein 117.                                                            | 1.78        |
| IPI00007244        | MPO                | isoform h17 of myeloperoxidase precursor.                                           | 1.77        |
| IPI00022418        | FN1                | isoform 1 of fibronectin precursor.                                                 | 1.76        |
| IPI00001653        | ZSWIM5             | similar to zinc finger swim domain-containing protein 5.                            | 1.76        |
| IPI00184094        | B3GNT8             | beta galactosyltransferase.                                                         | 1.76        |
| IPI00011692        | IVL                | involucrin.                                                                         | 1.73        |
| IPI00004656        | B2M                | beta-2-microglobulin precursor.                                                     | 1.73        |
| IPI00029168        | LPA                | apolipoprotein.                                                                     | 1.72        |
| IPI00011302        | CD59               | cd59 glycoprotein precursor.                                                        | 1.69        |
| IPI00396077        | TOPORS             | isoform 1 of e3 ubiquitin-protein ligase topors.                                    | 1.67        |
| IPI00745434        | PXN                | cdna flj46879 fis, clone uteru3015011, highly similar to paxillin.                  | 1.66        |
| IPI00296099        | THBS1              | thrombospondin-1 precursor.                                                         | 1.66        |
| IPI00328550        | THBS4              | thrombospondin-4 precursor.                                                         | 1.65        |
| IPI00025819        | CAPN3              | isoform i of calpain-3.                                                             | 1.64        |
| IPI00334996        | ADAMTS13           | hypothetical protein c9orf8.                                                        | 1.62        |
| IPI00791853        | NCOR1              | nuclear receptor co-repressor.                                                      | 1.61        |
| IPI00028030        | COMP               | cartilage oligomeric matrix protein precursor.                                      | 1.58        |
| IPI00023014        | VWF                | von willebrand factor precursor.                                                    | 1.57        |
| IPI00027507        | CFHR3              | complement factor h-related protein 3 precursor.                                    | 1.57        |
| IPI00148820        | DTX3               | isoform 2 of protein deltex-3.                                                      | 1.56        |

|             |          |                                                                              |      |
|-------------|----------|------------------------------------------------------------------------------|------|
| IPI00019223 | AKAP9    | isoform 1 of a-kinase anchor protein 9.                                      | 1.55 |
| IPI00292150 | LTBP2    | latent-transforming growth factor beta-binding protein 2 precursor.          | 1.54 |
| IPI00604691 | GPR157   | hypothetical protein (fragment).                                             | 1.54 |
| IPI00218733 | SOD1     | 16 kda protein.                                                              | 1.53 |
| IPI00807515 | FAM83H   | hypothetical protein loc286077.                                              | 1.53 |
| IPI00844156 | SERPINC1 | SERPINC1                                                                     | 1.53 |
| IPI00025084 | CAPNS1   | calpain small subunit 1.                                                     | 1.52 |
| IPI00644168 | ARHGAP22 | 59 kda protein.                                                              | 1.52 |
| IPI00003813 | CADM1    | nectin-like protein 2.                                                       | 1.51 |
| IPI00644346 | ADAMTSL2 | adamts-like protein 2 precursor.                                             | 1.50 |
| IPI00018136 | VCAM1    | isoform 1 of vascular cell adhesion protein 1 precursor.                     | 1.50 |
| IPI00295339 | SELP     | p-selectin precursor.                                                        | 1.49 |
| IPI00451624 | CRTAC1   | isoform 1 of cartilage acidic protein 1 precursor.                           | 1.46 |
| IPI00021578 | CFHR4    | complement factor h-related protein 4 precursor.                             | 1.44 |
| IPI00020599 | CALR     | calreticulin precursor.                                                      | 1.44 |
| IPI00739995 | LPA      | lipoprotein, lp.                                                             | 1.44 |
| IPI00295414 | COL15A1  | collagen alpha-1(xv) chain precursor.                                        | 1.44 |
| IPI00215767 | B4GALT1  | isoform long of beta-1,4-galactosyltransferase 1.                            | 1.43 |
| IPI00021891 | FGG      | isoform gamma-b of fibrinogen gamma chain precursor.                         | 1.43 |
| IPI00027038 | VSIG4    | isoform 1 of v-set and immunoglobulin domain-containing protein 4 precursor. | 1.43 |
| IPI00297284 | IGFBP2   | insulin-like growth factor-binding protein 2 precursor.                      | 1.42 |
| IPI00414283 | FN1      | fibronectin 1 isoform 4 preproprotein.                                       | 1.40 |
| IPI00006608 | APP      | isoform app770 of amyloid beta a4 protein precursor (fragment).              | 1.40 |
| IPI00020986 | LUM      | lumican precursor.                                                           | 1.40 |
| IPI00010471 | LCP1     | plastin-2.                                                                   | 1.40 |
| IPI00298883 | AZI1     | isoform 1 of 5-azacytidine-induced protein 1.                                | 1.39 |
| IPI00019372 | SRGN     | secretory granule proteoglycan core protein precursor.                       | 1.39 |
| IPI00795830 | AHSG     | 29 kda protein.                                                              | 1.39 |
| IPI00414784 | CD300A   | isoform 1 of cmrf35-h antigen precursor.                                     | 1.39 |
| IPI00000070 | LDLR     | low-density lipoprotein receptor precursor.                                  | 1.38 |
| IPI00796830 | A2M      | 13 kda protein.                                                              | 1.38 |
| IPI00022229 | APOB     | apolipoprotein b-100 precursor.                                              | 1.38 |
| IPI00291866 | SERPING1 | plasma protease c1 inhibitor precursor.                                      | 1.38 |
| IPI00299738 | PCOLCE   | procollagen c-endopeptidase enhancer 1 precursor.                            | 1.37 |
| IPI00019755 | GSTO1    | glutathione transferase omega-1.                                             | 1.37 |
| IPI00005721 | DEFA1    | neutrophil defensin 1 precursor.                                             | 1.36 |
| IPI00219217 | LDHB     | l-lactate dehydrogenase b chain.                                             | 1.35 |
| IPI00016915 | IGFBP7   | insulin-like growth factor-binding protein 7 precursor.                      | 1.35 |
| IPI00303292 | KPNA1    | importin alpha-1 subunit.                                                    | 1.35 |
| IPI00004084 | CREBL1   | isoform 2 of cyclic amp-dependent transcription factor atf-6 beta.           | 1.34 |
| IPI00022620 | SLURP1   | secreted ly-6/upar-related protein 1 precursor.                              | 1.34 |
| IPI00215899 | SRPX     | isoform 2 of sushi repeat-containing protein srpx precursor.                 | 1.33 |
| IPI00025473 | B4GALNT1 | beta-1,4 n-acetylgalactosaminyltransferase 1.                                | 1.33 |
| IPI00410078 | CREB5    | isoform 4 of camp response element-binding protein 5.                        | 1.33 |
| IPI00299116 | PODXL    | podocalyxin-like protein 1 precursor.                                        | 1.33 |

|             |          |                                                                            |      |
|-------------|----------|----------------------------------------------------------------------------|------|
| IPI00298860 | LTF      | growth-inhibiting protein 12.                                              | 1.32 |
| IPI00217185 | RYR3     | isoform 2 of ryanodine receptor 3.                                         | 1.32 |
| IPI00021085 | PGLYRP1  | peptidoglycan recognition protein precursor.                               | 1.31 |
| IPI00003817 | ARHGDI B | rho gdp-dissociation inhibitor 2.                                          | 1.31 |
| IPI00012011 | CFL1     | cofilin-1.                                                                 | 1.30 |
| IPI00004373 | MBL2     | mannose-binding protein c precursor.                                       | 1.30 |
| IPI00017601 | CP       | ceruloplasmin precursor.                                                   | 1.30 |
| IPI00645403 | KIAA1217 | isoform 1 of sickle tail protein homolog.                                  | 1.30 |
| IPI00479116 | CPN2     | carboxypeptidase n subunit 2 precursor.                                    | 1.30 |
| IPI00014575 | CDC6     | cell division control protein 6 homolog.                                   | 1.30 |
| IPI00003351 | ECM1     | extracellular matrix protein 1 precursor.                                  | 1.30 |
| IPI00167498 | C9orf93  | isoform 2 of uncharacterized protein c9orf93.                              | 1.29 |
| IPI00022429 | ORM1     | alpha-1-acid glycoprotein 1 precursor.                                     | 1.29 |
| IPI00021885 | FGA      | isoform 1 of fibrinogen alpha chain precursor.                             | 1.28 |
| IPI00023858 | FCGR3B   | fc-gamma receptor iiib.                                                    | 1.28 |
| IPI00022426 | AMBP     | ambp protein precursor.                                                    | 1.28 |
| IPI00374068 | ADAMTSL4 | isoform 1 of adamts-like protein 4 precursor.                              | 1.27 |
| IPI00032293 | CST3     | cystatin-c precursor.                                                      | 1.27 |
| IPI00014572 | SPARC    | sparc precursor.                                                           | 1.27 |
| IPI00294713 | MASP2    | isoform 1 of mannan-binding lectin serine protease 2 precursor.            | 1.27 |
| IPI00020990 | OMD      | osteomodulin precursor.                                                    | 1.26 |
| IPI00006971 | CD248    | isoform 1 of endosialin precursor.                                         | 1.26 |
| IPI00024825 | PRG4     | isoform a of proteoglycan-4 precursor.                                     | 1.26 |
| IPI00021834 | TFPI     | isoform alpha of tissue factor pathway inhibitor precursor.                | 1.26 |
| IPI00014048 | RNASE1   | ribonuclease pancreatic precursor.                                         | 1.26 |
| IPI00005774 | LRP8     | isoform 1 of low-density lipoprotein receptor-related protein 8 precursor. | 1.26 |
| IPI00021842 | APOE     | apolipoprotein e precursor.                                                | 1.26 |
| IPI00291262 | CLU      | clusterin precursor.                                                       | 1.24 |
| IPI00171391 | ALDH8A1  | aldehyde dehydrogenase 8a1 isoform 1.                                      | 1.24 |
| IPI00029193 | HGFAC    | hepatocyte growth factor activator precursor.                              | 1.24 |
| IPI00010341 | PRG2     | bone-marrow proteoglycan precursor.                                        | 1.24 |
| IPI00029723 | FSTL1    | follistatin-related protein 1 precursor.                                   | 1.23 |
| IPI00000137 | GNPTG    | n-acetylglucosamine-1-phosphotransferase subunit gamma precursor.          | 1.23 |
| IPI00019038 | LYZ      | lysozyme c precursor.                                                      | 1.23 |
| IPI00152878 | DBF4B    | activator of s-phase kinase-like protein 1.                                | 1.23 |
| IPI00103636 | WFDC2    | isoform 2 of wap four-disulfide core domain protein 2 precursor.           | 1.23 |
| IPI00022420 | RBP4     | plasma retinol-binding protein precursor.                                  | 1.22 |
| IPI00290856 | XLKD1    | lymphatic vessel endothelial hyaluronic acid receptor 1 precursor.         | 1.21 |
| IPI00026154 | PRKCSH   | glucosidase 2 subunit beta precursor.                                      | 1.21 |
| IPI00218732 | PON1     | serum paraoxonase/arylesterase 1.                                          | 1.20 |
| IPI00328746 | RTN4RL2  | reticulon-4 receptor-like 2 precursor.                                     | 1.20 |
| IPI00029699 | RNASE4   | ribonuclease 4 precursor.                                                  | 1.20 |
| IPI00218795 | SELL     | l-selectin precursor.                                                      | 1.20 |
| IPI00151990 | C5orf14  | disulfide isomerase.                                                       | 1.20 |
| IPI00550069 | RNH1     | ribonuclease inhibitor.                                                    | 1.19 |

|             |          |                                                                                         |      |
|-------------|----------|-----------------------------------------------------------------------------------------|------|
| IPI00301143 | PI16     | isoform 1 of peptidase inhibitor 16 precursor.                                          | 1.18 |
| IPI00299307 | MASP1    | complement-activating component of ra-reactive factor precursor.                        | 1.18 |
| IPI00292530 | ITIH1    | inter-alpha-trypsin inhibitor heavy chain h1 precursor.                                 | 1.18 |
| IPI00164623 | C3       | 187 kda protein.                                                                        | 1.18 |
| IPI00012503 | PSAP     | isoform sap-mu-0 of proactivator polypeptide precursor.                                 | 1.18 |
| IPI00328609 | SERPINA4 | kallistatin precursor.                                                                  | 1.18 |
| IPI00022391 | APCS     | serum amyloid p-component precursor.                                                    | 1.17 |
| IPI00032291 | C5       | complement c5 precursor.                                                                | 1.17 |
| IPI00291867 | CFI      | complement factor i precursor.                                                          | 1.17 |
| IPI00022937 | F5       | coagulation factor v.                                                                   | 1.16 |
| IPI00296777 | SPARCL1  | sparc-like protein 1 precursor.                                                         | 1.16 |
| IPI00056309 | LEAP2    | liver-expressed antimicrobial peptide 2 precursor.                                      | 1.16 |
| IPI00412982 | NOTCH1   | neurogenic locus notch homolog protein 1 precursor.                                     | 1.16 |
| IPI00374693 | TTY7     | transcript y 7 protein (fragment).                                                      | 1.16 |
| IPI00290283 | MASP1    | mannan-binding lectin serine protease 1 isoform 2 precursor.                            | 1.16 |
| IPI00298497 | FGB      | fibrinogen beta chain precursor.                                                        | 1.16 |
| IPI00171411 | GOLPH2   | golgi phosphoprotein 2.                                                                 | 1.15 |
| IPI00293925 | FCN3     | isoform 1 of ficolin-3 precursor.                                                       | 1.15 |
| IPI00160766 | PTF1A    | pancreas transcription factor 1 subunit alpha.                                          | 1.15 |
| IPI00299485 | CD93     | complement component c1q receptor precursor.                                            | 1.15 |
| IPI00419966 | ABI3BP   | isoform 2 of target of nesh-sh3 precursor.                                              | 1.15 |
| IPI00024284 | HSPG2    | basement membrane-specific heparan sulfate proteoglycan core proteinprecursor.          | 1.15 |
| IPI00019176 | RARRES2  | retinoic acid receptor responder protein 2 precursor.                                   | 1.15 |
| IPI00292532 | CAMP     | antibacterial protein fall-39 precursor.                                                | 1.14 |
| IPI00156171 | ENPP2    | isoform 1 of ectonucleotide pyrophosphatase/phosphodiesterase familymember 2 precursor. | 1.14 |
| IPI00218192 | ITIH4    | isoform 2 of inter-alpha-trypsin inhibitor heavy chain h4 precursor.                    | 1.14 |
| IPI00007240 | F13B     | coagulation factor xiii b chain precursor.                                              | 1.14 |
| IPI00008780 | STC2     | stanniocalcin-2 precursor.                                                              | 1.14 |
| IPI00218413 | BTD      | biotinidase precursor.                                                                  | 1.14 |
| IPI00006114 | SERPINF1 | pigment epithelium-derived factor precursor.                                            | 1.14 |
| IPI00329648 | POMT2    | isoform 1 of protein o-mannosyl-transferase 2.                                          | 1.14 |
| IPI00298363 | KHSRP    | far upstream element-binding protein 2.                                                 | 1.13 |
| IPI00022488 | HPX      | hemopexin precursor.                                                                    | 1.13 |
| IPI00783987 | C3       | complement c3 precursor (fragment).                                                     | 1.13 |
| IPI00296176 | F9       | coagulation factor ix precursor.                                                        | 1.13 |
| IPI00007067 | C9orf19  | golgi-associated plant pathogenesis-related protein 1.                                  | 1.12 |
| IPI00031490 | COLEC11  | collectin sub-family member 11 isoform a.                                               | 1.12 |
| IPI00066193 | SCGB3A1  | secretoglobin family 3a member 1 precursor.                                             | 1.12 |
| IPI00298828 | APOH     | beta-2-glycoprotein 1 precursor.                                                        | 1.12 |
| IPI00029658 | EFEMP1   | isoform 1 of egf-containing fibulin-like extracellular matrix protein1 precursor.       | 1.12 |
| IPI00328703 | OAF      | oaf homolog.                                                                            | 1.11 |
| IPI00025862 | C4BPB    | isoform 1 of c4b-binding protein beta chain precursor.                                  | 1.11 |
| IPI00103440 | CASZ1    | castor homolog 1, zinc finger isoform a.                                                | 1.11 |

|             |           |                                                                             |      |
|-------------|-----------|-----------------------------------------------------------------------------|------|
| IPI00006093 | FAM38A    | mib.                                                                        | 1.11 |
| IPI00021364 | CFP       | properdin precursor.                                                        | 1.11 |
| IPI00007199 | SERPINA10 | protein z-dependent protease inhibitor precursor.                           | 1.10 |
| IPI00294193 | TMEM110   | isoform 1 of inter-alpha-trypsin inhibitor heavy chain h4 precursor.        | 1.10 |
| IPI00008554 | RNASE4    | angiogenin precursor.                                                       | 1.10 |
| IPI00029061 | SEPP1     | selenoprotein p precursor.                                                  | 1.10 |
| IPI00009920 | C6        | complement component c6 precursor.                                          | 1.10 |
| IPI00028911 | DAG1      | dystroglycan precursor.                                                     | 1.10 |
| IPI00022895 | A1BG      | alpha-1b-glycoprotein precursor.                                            | 1.10 |
| IPI00303685 | OR6B3     | olfactory receptor 6b3.                                                     | 1.09 |
| IPI00011588 | PLA2G7    | platelet-activating factor acetylhydrolase precursor.                       | 1.09 |
| IPI00032220 | AGT       | angiotensinogen precursor.                                                  | 1.08 |
| IPI00299059 | CHL1      | isoform 2 of neural cell adhesion molecule l1-like protein precursor.       | 1.08 |
| IPI00020091 | ORM2      | alpha-1-acid glycoprotein 2 precursor.                                      | 1.08 |
| IPI00299547 | LCN2      | neutrophil gelatinase-associated lipocalin precursor.                       | 1.08 |
| IPI00019591 | CFB       | isoform 1 of complement factor b precursor (fragment).                      | 1.08 |
| IPI00013299 | NBL1      | neuroblastoma, suppression of tumorigenicity 1 1.                           | 1.08 |
| IPI00019568 | F2        | prothrombin precursor (fragment).                                           | 1.08 |
| IPI00009521 | MARCO     | macrophage receptor marco.                                                  | 1.08 |
| IPI00760855 | TMEM110   | 101 kda protein.                                                            | 1.08 |
| IPI00008580 | SLPI      | antileukoproteinase precursor.                                              | 1.08 |
| IPI00022417 | LRG1      | leucine-rich alpha-2-glycoprotein precursor.                                | 1.07 |
| IPI00012832 | MFAP5     | microfibrillar-associated protein 5 precursor.                              | 1.07 |
| IPI00032258 | C4A       | complement c4-a precursor.                                                  | 1.07 |
| IPI00028413 | ITIH3     | inter-alpha-trypsin inhibitor heavy chain h3 precursor.                     | 1.07 |
| IPI00005908 | ADAMTS1   | adamts-1 precursor.                                                         | 1.06 |
| IPI00456969 | DYNC1H1   | dynein heavy chain, cytosolic.                                              | 1.06 |
| IPI00019576 | F10       | coagulation factor x precursor.                                             | 1.06 |
| IPI00009793 | C1RL      | complement c1r-like protein.                                                | 1.06 |
| IPI00148061 | LDHAL6A   | l-lactate dehydrogenase a-like 6a.                                          | 1.05 |
| IPI00022394 | C1QC      | complement c1q subcomponent subunit c precursor.                            | 1.05 |
| IPI00019449 | RNASE2    | nonsecretory ribonuclease precursor.                                        | 1.04 |
| IPI00025426 | PZP       | pregnancy zone protein precursor.                                           | 1.04 |
| IPI00006154 | CFHR2     | isoform long of complement factor h-related protein 2 precursor.            | 1.04 |
| IPI00021854 | APOA2     | apolipoprotein a-ii precursor.                                              | 1.04 |
| IPI00218803 | FBLN1     | isoform b of fibulin-1 precursor.                                           | 1.04 |
| IPI00745161 | STEAP4    | isoform 1 of metalloredutase steap4.                                        | 1.04 |
| IPI00296165 | C1R       | complement c1r subcomponent precursor.                                      | 1.04 |
| IPI00032179 | SERPINC1  | antithrombin iii variant.                                                   | 1.04 |
| IPI00027451 | GLI1      | zinc finger protein gli1.                                                   | 1.03 |
| IPI00026199 | GPX3      | glutathione peroxidase 3 precursor.                                         | 1.03 |
| IPI00025204 | CD5L      | cd5 antigen-like precursor.                                                 | 1.03 |
| IPI00298971 | VTN       | vitronectin precursor.                                                      | 1.03 |
| IPI00029236 | IGFBP5    | insulin-like growth factor-binding protein 5 precursor.                     | 1.03 |
| IPI00017696 | C1S       | complement c1s subcomponent precursor.                                      | 1.03 |
| IPI00299503 | GPLD1     | isoform 1 of phosphatidylinositol-glycan-specific phospholipase dprecursor. | 1.03 |
| IPI00022395 | C9        | complement component c9 precursor.                                          | 1.02 |

|             |          |                                                                             |      |
|-------------|----------|-----------------------------------------------------------------------------|------|
| IPI0001885  | SNX8     | sorting nexin-8.                                                            | 1.02 |
| IPI00104074 | CD163    | isoform 1 of scavenger receptor cysteine-rich type 1 protein m130precursor. | 1.02 |
| IPI00023314 | INHBC    | inhibin beta c chain precursor.                                             | 1.02 |
| IPI00019943 | AFM      | afamin precursor.                                                           | 1.02 |
| IPI00029863 | SERPINF2 | alpha-2-antiplasmin precursor.                                              | 1.02 |
| IPI00742696 | GC       | vitamin d-binding protein precursor.                                        | 1.02 |
| IPI00025864 | BCHE     | cholinesterase precursor.                                                   | 1.01 |
| IPI00550991 | SERPINA3 | isoform 1 of alpha-1-antichymotrypsin precursor.                            | 1.01 |
| IPI00376435 | VPS13B   | vacuolar protein sorting 13b isoform 4.                                     | 1.01 |
| IPI00298447 | TARBP1   | probable methyltransferase tarbp1.                                          | 1.01 |
| IPI00022331 | LCAT     | phosphatidylcholine-sterol acyltransferase precursor.                       | 1.01 |
| IPI00030739 | APOM     | apolipoprotein m.                                                           | 1.01 |
| IPI00329775 | CPB2     | isoform 1 of carboxypeptidase b2 precursor.                                 | 1.01 |
| IPI00027780 | MMP2     | 72 kda type iv collagenase precursor.                                       | 1.00 |
| IPI00029739 | CFH      | isoform 1 of complement factor h precursor.                                 | 1.00 |
| IPI00215894 | KNG1     | isoform lmw of kininogen-1 precursor.                                       | 1.00 |
| IPI00031392 | CARD14   | caspase recruitment domain protein 14 isoform 2.                            | 0.99 |
| IPI00292950 | SERPIND1 | heparin cofactor 2 precursor.                                               | 0.99 |
| IPI00639937 | CFB      | b-factor, properdin.                                                        | 0.99 |
| IPI00009028 | CLEC3B   | tetranectin precursor.                                                      | 0.99 |
| IPI00009802 | VCAN     | isoform v0 of versican core protein precursor.                              | 0.98 |
| IPI00305380 | IGFBP4   | insulin-like growth factor-binding protein 4 precursor.                     | 0.98 |
| IPI00009829 | CPA3     | mast cell carboxypeptidase a precursor.                                     | 0.98 |
| IPI00294705 | PAPLN    | papilin.                                                                    | 0.98 |
| IPI00032328 | KNG1     | isoform hmw of kininogen-1 precursor.                                       | 0.98 |
| IPI00005439 | FETUB    | fetuin-b precursor.                                                         | 0.97 |
| IPI00477992 | C1QB     | complement component 1, q subcomponent, b chain precursor.                  | 0.97 |
| IPI00739473 | GVIN1    | imp dehydrogenase/gmp reductase family protein.                             | 0.97 |
| IPI00478003 | A2M      | alpha-2-macroglobulin precursor.                                            | 0.97 |
| IPI00296608 | C7       | complement component c7 precursor.                                          | 0.97 |
| IPI00018305 | IGFBP3   | insulin-like growth factor-binding protein 3 precursor.                     | 0.97 |
| IPI00409638 | ANKRD38  | isoform 1 of ankyrin repeat domain-containing protein 38.                   | 0.97 |
| IPI00749154 | PRSS33   | 29 kda protein.                                                             | 0.96 |
| IPI00555812 | GC       | vitamin d-binding protein precursor.                                        | 0.96 |
| IPI00003590 | QSOX1    | isoform 1 of sulfhydryl oxidase 1 precursor.                                | 0.96 |
| IPI00016832 | PSMA1    | isoform short of proteasome subunit alpha type 1.                           | 0.96 |
| IPI00655976 | PRG4     | isoform c of proteoglycan-4 precursor.                                      | 0.96 |
| IPI00020687 | SPINK1   | pancreatic secretory trypsin inhibitor precursor.                           | 0.96 |
| IPI00019580 | PLG      | plasminogen precursor.                                                      | 0.95 |
| IPI00005300 | FAM40B   | isoform 2 of protein fam40b.                                                | 0.95 |
| IPI00002714 | DKK3     | dickkopf-related protein 3 precursor.                                       | 0.95 |
| IPI00027166 | TIMP2    | metalloproteinase inhibitor 2 precursor.                                    | 0.95 |
| IPI00146329 | C9orf90  | isoform 1 of uncharacterized protein c9orf90.                               | 0.95 |
| IPI00163207 | PGLYRP2  | isoform 1 of n-acetylmuramoyl-l-alanine amidase precursor.                  | 0.95 |
| IPI00027848 | MRC1     | macrophage mannose receptor 1 precursor.                                    | 0.94 |
| IPI00816729 | TGFB1    | TGFbeta1                                                                    | 0.94 |
| IPI00032311 | LBP      | lipopolysaccharide-binding protein precursor.                               | 0.94 |



|             |          |                                                                                   |      |
|-------------|----------|-----------------------------------------------------------------------------------|------|
| IPI00293057 | CPB2     | isoform 2 of carboxypeptidase b2 precursor.                                       | 0.94 |
| IPI00738433 | CPN2     | similar to carboxypeptidase n subunit 2 precursor.                                | 0.94 |
| IPI00018219 | TGFBI    | transforming growth factor-beta-induced protein ig-h3 precursor.                  | 0.94 |
| IPI00041065 | HABP2    | hyaluronan-binding protein 2 precursor.                                           | 0.94 |
| IPI00296537 | FBLN1    | isoform c of fibulin-1 precursor.                                                 | 0.93 |
| IPI00387168 | PCSK9    | isoform 1 of proprotein convertase subtilisin/kexin type 9 precursor.             | 0.93 |
| IPI00654888 | KLKB1    | kallikrein b, plasma (fletcher factor) 1.                                         | 0.93 |
| IPI00005142 | FGFR1    | isoform 1 of basic fibroblast growth factor receptor 1 precursor.                 | 0.93 |
| IPI00294004 | PROS1    | vitamin k-dependent protein s precursor.                                          | 0.93 |
| IPI00022392 | C1QA     | complement c1q subcomponent subunit a precursor.                                  | 0.93 |
| IPI00292218 | MST1     | hepatocyte growth factor-like protein precursor.                                  | 0.93 |
| IPI00022431 | AHSG     | alpha-2-hs-glycoprotein precursor.                                                | 0.93 |
| IPI00019581 | F12      | coagulation factor xii precursor.                                                 | 0.93 |
| IPI00029260 | CD14     | monocyte differentiation antigen cd14 precursor.                                  | 0.92 |
| IPI00395488 | VASN     | vasorin precursor.                                                                | 0.92 |
| IPI00010295 | CPN1     | carboxypeptidase n catalytic chain precursor.                                     | 0.92 |
| IPI00021727 | C4BPA    | c4b-binding protein alpha chain precursor.                                        | 0.92 |
| IPI00031086 | IGFBP1   | insulin-like growth factor-binding protein 1 precursor.                           | 0.92 |
| IPI00026314 | GSN      | isoform 1 of gelsolin precursor.                                                  | 0.91 |
| IPI00102575 | ATAD5    | atp(gtp)-binding protein.                                                         | 0.91 |
| IPI00043363 | PRICKLE1 | prickle-like protein 1.                                                           | 0.91 |
| IPI00445897 | C22orf34 | novel protein.                                                                    | 0.90 |
| IPI00451965 | UGT1A6   | udp-glucuronosyltransferase 1-6 precursor.                                        | 0.90 |
| IPI00643747 | C22orf30 | uncharacterized protein c22orf30.                                                 | 0.90 |
| IPI00299435 | APOF     | apolipoprotein f precursor.                                                       | 0.90 |
| IPI00011261 | C8G      | complement component c8 gamma chain precursor.                                    | 0.90 |
| IPI00008556 | F11      | isoform 1 of coagulation factor xi precursor.                                     | 0.89 |
| IPI00011264 | CFHR1    | complement factor h-related protein 1 precursor.                                  | 0.89 |
| IPI00293748 | MINPP1   | isoform 1 of multiple inositol polyphosphate phosphatase 1 precursor.             | 0.89 |
| IPI00045600 | DAB2IP   | dab2 interacting protein isoform 1.                                               | 0.89 |
| IPI00171678 | DBH      | dopamine beta-hydroxylase precursor.                                              | 0.89 |
| IPI00792115 | CLEC3B   | hypothetical protein dkfzp686h17246.                                              | 0.88 |
| IPI00791350 | CLEC3B   | 11 kda protein.                                                                   | 0.88 |
| IPI00021817 | PROC     | vitamin k-dependent protein c precursor.                                          | 0.87 |
| IPI00026240 | BST1     | adp-ribosyl cyclase 2 precursor.                                                  | 0.87 |
| IPI00020996 | IGFALS   | insulin-like growth factor-binding protein complex acid labile chain precursor.   | 0.87 |
| IPI00006662 | APOD     | apolipoprotein d precursor.                                                       | 0.87 |
| IPI00743907 | C1S      | 75 kda protein.                                                                   | 0.87 |
| IPI00006543 | CFHR5    | complement factor h-related 5.                                                    | 0.86 |
| IPI00001610 | IGF1     | insulin-like growth factor ia precursor.                                          | 0.86 |
| IPI00023019 | SHBG     | isoform 1 of sex hormone-binding globulin precursor.                              | 0.86 |
| IPI00643525 | C4A      | complement component 4a.                                                          | 0.86 |
| IPI00102923 | FAM108A1 | protein fam108a1.                                                                 | 0.86 |
| IPI00009938 | CEACAM1  | isoform a of carcinoembryonic antigen-related cell adhesion molecule 1 precursor. | 0.86 |
| IPI00305461 | ITIH2    | inter-alpha-trypsin inhibitor heavy chain h2 precursor.                           | 0.85 |

|             |          |                                                                                |      |
|-------------|----------|--------------------------------------------------------------------------------|------|
| IPI00019205 | C14orf4  | ring finger protein c14orf4.                                                   | 0.85 |
| IPI00220736 | NEU3     | sialidase-3.                                                                   | 0.85 |
| IPI00303963 | C2       | complement c2 precursor (fragment).                                            | 0.85 |
| IPI00642108 | WDR45    | protein.                                                                       | 0.85 |
| IPI00745872 | ALB      | isoform 1 of serum albumin precursor.                                          | 0.85 |
| IPI00328113 | FBN1     | fibrillin-1 precursor.                                                         | 0.84 |
| IPI00027235 | ATRN     | isoform 1 of attractin precursor.                                              | 0.84 |
| IPI00401264 | TXNDC4   | thioredoxin domain-containing protein 4 precursor.                             | 0.84 |
| IPI00022371 | HRG      | histidine-rich glycoprotein precursor.                                         | 0.83 |
| IPI00031008 | TNC      | isoform 1 of tenascin precursor.                                               | 0.83 |
| IPI00103871 | ROBO4    | isoform 1 of roundabout homolog 4 precursor.                                   | 0.83 |
| IPI00001611 | IGF2     | isoform 1 of insulin-like growth factor ii precursor.                          | 0.83 |
| IPI00302309 | TTC17    | ttc17 protein.                                                                 | 0.83 |
| IPI00293565 | FLT4     | fms-related tyrosine kinase 4 isoform 1.                                       | 0.83 |
| IPI00396418 | FAM83F   | family with sequence similarity 83, member f.                                  | 0.83 |
| IPI00242956 | FCGBP    | iggfc-binding protein precursor.                                               | 0.82 |
| IPI00000877 | HYOU1    | 150 kda oxygen-regulated protein precursor.                                    | 0.82 |
| IPI00010405 | ROR1     | isoform long of tyrosine-protein kinase transmembrane receptor ror1 precursor. | 0.82 |
| IPI00418163 | C4B      | complement component 4b preproprotein.                                         | 0.82 |
| IPI00301647 | GLE1L    | isoform 1 of nucleoporin gle1.                                                 | 0.81 |
| IPI00217865 | FGD2     | isoform 1 of fyve, rhogef and ph domain-containing protein 2.                  | 0.81 |
| IPI00384444 | KRT14    | keratin, type i cytoskeletal 14.                                               | 0.81 |
| IPI00082524 | ZNF782   | zinc finger protein 782.                                                       | 0.80 |
| IPI00011252 | C8A      | complement component c8 alpha chain precursor.                                 | 0.80 |
| IPI00329104 | LILRA3   | leukocyte immunoglobulin-like receptor subfamily a member 3 precursor.         | 0.79 |
| IPI00301288 | SVEP1    | polydom.                                                                       | 0.79 |
| IPI00022434 | ALB      | serum albumin.                                                                 | 0.77 |
| IPI00297655 | NOTCH2   | neurogenic locus notch homolog protein 2 precursor.                            | 0.77 |
| IPI00654875 | C4B      | complement c4-b precursor.                                                     | 0.77 |
| IPI00220327 | KRT1     | keratin, type ii cytoskeletal 1.                                               | 0.76 |
| IPI00004957 | ANGPTL3  | angiopoietin-related protein 3 precursor.                                      | 0.76 |
| IPI00385956 | C15orf39 | brain my035 protein.                                                           | 0.76 |
| IPI00294395 | C8B      | complement component c8 beta chain precursor.                                  | 0.76 |
| IPI00004798 | CRISP3   | cysteine-rich secretory protein 3 precursor.                                   | 0.75 |
| IPI00032826 | ST13     | hsc70-interacting protein.                                                     | 0.75 |
| IPI00011651 | PTPRG    | isoform 1 of receptor-type tyrosine-protein phosphatase gammad precursor.      | 0.75 |
| IPI00215756 | MYO7A    | isoform 5 of myosin-viia.                                                      | 0.74 |
| IPI00009908 | ARMCX1   | armadillo repeat-containing x-linked protein 1.                                | 0.73 |
| IPI00792588 | SMAD6    | 20 kda protein.                                                                | 0.71 |
| IPI00375676 | FTL      | ferritin light polypeptide variant.                                            | 0.71 |
| IPI00000783 | PSMB8    | isoform 1 of proteasome subunit beta type 8 precursor.                         | 0.70 |
| IPI00747824 | KLHL18   | kelch-like protein 18.                                                         | 0.70 |
| IPI00297160 | CD44     | isoform 12 of cd44 antigen precursor.                                          | 0.69 |
| IPI00744286 | B3GALNT2 | isoform 2 of udp-galnac:beta-1,3-n-acetylgalactosaminyltransferase 2.          | 0.69 |
| IPI00015881 | CSF1     | isoform 1 of macrophage colony-stimulating factor 1 precursor.                 | 0.69 |

|             |          |                                                                             |      |
|-------------|----------|-----------------------------------------------------------------------------|------|
| IPI00018274 | EGFR     | isoform 1 of epidermal growth factor receptor precursor.                    | 0.68 |
| IPI00022731 | APOC4    | apolipoprotein c-iv precursor.                                              | 0.68 |
| IPI00007675 | DYNC1LI1 | cytoplasmic dynein 1 light intermediate chain 1.                            | 0.68 |
| IPI00384599 | TOPORS   | cdna flj25547 fis, clone jth01487.                                          | 0.67 |
| IPI00005811 | MLH3     | isoform 1 of dna mismatch repair protein mlh3.                              | 0.67 |
| IPI00009822 | SRP54    | signal recognition particle 54 kda protein.                                 | 0.67 |
| IPI00216164 | EHHADH   | peroxisomal bifunctional enzyme.                                            | 0.66 |
| IPI00019450 | TROVE2   | isoform long of 60 kda ss-a/ro ribonucleoprotein.                           | 0.66 |
| IPI00478297 | ZNF625   | 62 kda protein.                                                             | 0.65 |
| IPI00008161 | ATP12A   | atp12a protein.                                                             | 0.65 |
| IPI00217405 | UBR1     | isoform 1 of e3 ubiquitin-protein ligase ubr1.                              | 0.64 |
| IPI00024752 | CLEC3A   | c-type lectin superfamily member 1 precursor.                               | 0.64 |
| IPI00418228 | PHPT1    | hspc141.                                                                    | 0.64 |
| IPI00434580 | MYOM1    | myomesin 1 isoform a.                                                       | 0.62 |
| IPI00306682 | UNC84A   | isoform 3 of sad1/unc-84 protein-like 1.                                    | 0.62 |
| IPI00001593 | PRCP     | lysosomal pro-x carboxypeptidase precursor.                                 | 0.62 |
| IPI00550533 | MLLT11   | uncharacterized protein c1orf56.                                            | 0.62 |
| IPI00220903 | ACOT11   | isoform 2 of acyl-coenzyme a thioesterase 11.                               | 0.62 |
| IPI00026944 | NID1     | isoform 1 of nidogen-1 precursor.                                           | 0.61 |
| IPI00477030 | C18orf2  | putative c18orf2 variant 1.                                                 | 0.61 |
| IPI00401283 | MEGF9    | multiple epidermal growth factor-like domains 9 precursor.                  | 0.60 |
| IPI00031618 | DDI2     | isoform 3 of ddi1 homolog 2.                                                | 0.60 |
| IPI00013988 | ARHGAP5  | rho gtpase-activating protein 5.                                            | 0.59 |
| IPI00297412 | CADPS    | isoform 1 of calcium-dependent secretion activator 1.                       | 0.59 |
| IPI00014287 | FOLR3    | folate receptor 3 precursor.                                                | 0.57 |
| IPI00180305 | ZUBR1    | isoform 5 of zinc finger ubr1-type protein 1.                               | 0.57 |
| IPI00022051 | WISP3    | wnt1-inducible-signaling pathway protein 3 precursor.                       | 0.55 |
| IPI00027843 | PROZ     | isoform 1 of vitamin k-dependent protein z precursor.                       | 0.53 |
| IPI00479404 | VPS13D   | 492 kda protein.                                                            | 0.52 |
| IPI00007047 | S100A8   | protein s100-a8.                                                            | 0.52 |
| IPI00647051 | LAMA3    | 14 kda protein.                                                             | 0.51 |
| IPI00029702 | PTK2B    | isoform 1 of protein tyrosine kinase 2 beta.                                | 0.51 |
| IPI00784155 | SLAIN1   | 61 kda protein.                                                             | 0.51 |
| IPI00002288 | XRCC6BP1 | xrcc6 binding protein 1.                                                    | 0.51 |
| IPI00386763 | ADAMTS9  | isoform 1 of adamts-9 precursor.                                            | 0.50 |
| IPI00167093 | CFHR1    | complement factor h-related 1.                                              | 0.48 |
| IPI00464985 | VPS8     | isoform 1 of vacuolar protein sorting-associated protein 8 homolog.         | 0.46 |
| IPI00012303 | SELENBP1 | selenium-binding protein 1.                                                 | 0.45 |
| IPI00098591 | KCNH1    | isoform 2 of potassium voltage-gated channel subfamily h member 1.          | 0.45 |
| IPI00019383 | GALK1    | galactokinase.                                                              | 0.43 |
| IPI00004363 | STK39    | ste20/sps1-related proline-alanine-rich protein kinase.                     | 0.42 |
| IPI00414021 | TRIM41   | isoform 1 of tripartite motif-containing protein 41.                        | 0.40 |
| IPI00167515 | ZADH1    | isoform 1 of zinc-binding alcohol dehydrogenase domain-containingprotein 1. | 0.38 |
| IPI00166776 | CREG2    | protein creg2 precursor.                                                    | 0.38 |
| IPI00031696 | FASTKD3  | fast kinase domain-containing protein 3.                                    | 0.37 |
| IPI00031708 | FAH      | fumarylacetoacetase.                                                        | 0.37 |

|             |          |                                                                              |      |
|-------------|----------|------------------------------------------------------------------------------|------|
| IPI00296713 | GRN      | isoform 1 of granulins precursor.                                            | 0.36 |
| IPI00747210 | NBPF1    | conserved hypothetical protein.                                              | 0.36 |
| IPI00554777 | ASNS     | asparagine synthetase.                                                       | 0.35 |
| IPI00307298 | LRP5     | low-density lipoprotein receptor-related protein 5 precursor.                | 0.34 |
| IPI00399252 | PHF17    | isoform 1 of protein jade-1.                                                 | 0.33 |
| IPI00329555 | F7       | isoform a of coagulation factor vii precursor.                               | 0.33 |
| IPI00299608 | PSMD1    | isoform 1 of 26s proteasome non-atpase regulatory subunit 1.                 | 0.32 |
| IPI00329470 | KIAA1958 | isoform 1 of uncharacterized protein kiaa1958.                               | 0.31 |
| IPI00217612 | ARMC3    | isoform 2 of armadillo repeat-containing protein 3.                          | 0.31 |
| IPI00010369 | TEX15    | testis-expressed sequence 15 protein.                                        | 0.31 |
| IPI00009865 | KRT10    | keratin, type i cytoskeletal 10.                                             | 0.30 |
| IPI00298281 | LAMC1    | laminin subunit gamma-1 precursor.                                           | 0.30 |
| IPI00514029 | C1orf124 | chromosome 1 open reading frame 124.                                         | 0.29 |
| IPI00293487 | REC8     | meiotic recombination protein rec8-like 1.                                   | 0.28 |
| IPI00009995 | ELF2     | isoform 1 of ets-related transcription factor elf-2.                         | 0.27 |
| IPI00394834 | VWA2     | von willebrand factor a domain-containing protein 2.                         | 0.27 |
| IPI00658151 | SPEG     | similar to aortic preferentially expressed gene 1.                           | 0.26 |
| IPI00164719 | KIAA1432 | protein kiaa1432.                                                            | 0.26 |
| IPI00399411 | LBXCOR1  | ladybird homeobox corepressor 1.                                             | 0.26 |
| IPI00007411 | AKAP11   | a-kinase anchor protein 11.                                                  | 0.25 |
| IPI00012395 | ZNF43    | zinc finger protein 43.                                                      | 0.24 |
| IPI00221162 | CHRD     | isoform 4 of chordin precursor.                                              | 0.23 |
| IPI00043560 | TSNARE1  | t-snare domain containing 1.                                                 | 0.23 |
| IPI00026277 | ZBTB7B   | btb/poz domain containing protein.                                           | 0.23 |
| IPI00385631 | ZZEF1    | zinc finger, zz type with ef hand domain 1.                                  | 0.21 |
| IPI00328754 | ZFH4     | zinc finger homeodomain 4.                                                   | 0.19 |
| IPI00305975 | SPON2    | spondin-2 precursor.                                                         | 0.18 |
| IPI00023501 | TNFRSF1B | isoform 1 of tumor necrosis factor receptor superfamily member 1b precursor. | 0.18 |
| IPI00165249 | PFTK1    | isoform 1 of serine/threonine-protein kinase pftaire-1.                      | 0.18 |
| IPI00065071 | ANKAR    | cdna flj25415 fis, clone tst03443.                                           | 0.17 |
| IPI00002424 | PLEKHF2  | pleckstrin homology domain-containing family f member 2.                     | 0.16 |
| IPI00018871 | ARL8B    | adp-ribosylation factor-like protein 8b.                                     | 0.16 |
| IPI00455850 | LRRC24   | leucine-rich repeat-containing protein 24 precursor.                         | 0.15 |
| IPI00217458 | GPT      | alanine aminotransferase 1.                                                  | 0.15 |
| IPI00307688 | GIPC3    | pdz domain-containing protein gipc3.                                         | 0.14 |
| IPI00604711 | KIF1A    | isoform 1 of kinesin-like protein kif1a.                                     | 0.14 |
| IPI00787253 | CXorf39  | isoform 2 of uncharacterized protein cxorf39.                                | 0.14 |
| IPI00017921 | BICC1    | isoform 2 of protein bicaudal c homolog 1.                                   | 0.13 |
| IPI00442344 | SLC27A1  | 71 kda protein.                                                              | 0.13 |
| IPI00472817 | ZNF440   | similar to zinc finger protein 440.                                          | 0.13 |
| IPI00383357 | WAC      | pro1741.                                                                     | 0.13 |
| IPI00045528 | IFT140   | hypothetical protein gs114.                                                  | 0.13 |
| IPI00009146 | TRAFD1   | traf-type zinc finger domain-containing protein 1.                           | 0.12 |
| IPI00015983 | EDG3     | sphingosine 1-phosphate receptor edg-3.                                      | 0.12 |
| IPI00169283 | MOSPD2   | isoform 1 of motile sperm domain-containing protein 2.                       | 0.11 |
| IPI00006486 | KIAA0748 | similar to sperm specific antigen 2 isoform 1.                               | 0.10 |
| IPI00647939 | C6orf148 | cdna flj30329 fis, clone brace2007201.                                       | 0.09 |

|             |         |                                                                           |      |
|-------------|---------|---------------------------------------------------------------------------|------|
| IPI00003370 | STX1A   | isoform 1 of syntaxin-1a.                                                 | 0.09 |
| IPI00446473 | MDN1    | cdna flj42031 fis, clone splen2037194, weakly similar to norg protein.    | 0.09 |
| IPI00478376 | INPP5B  | isoform 1 of type ii inositol-1,4,5-trisphosphate 5-phosphataseprecursor. | 0.08 |
| IPI00646555 | ZNF452  | protein znf452.                                                           | 0.08 |
| IPI00013418 | BIRC2   | baculoviral iap repeat-containing protein 2.                              | 0.08 |
| IPI00412415 | BAZ1A   | isoform 1 of bromodomain adjacent to zinc finger domain protein 1a.       | 0.07 |
| IPI00000879 | TXK     | tyrosine-protein kinase txk.                                              | 0.07 |
| IPI00010948 | TRIM26  | tripartite motif-containing protein 26.                                   | 0.06 |
| IPI00023779 | NIT1    | isoform 2 of nitrilase homolog 1.                                         | 0.06 |
| IPI00445212 | WWC2    | cdna flj44069 fis, clone testi4037188.                                    | 0.06 |
| IPI00023456 | CHRM3   | muscarinic acetylcholine receptor m3.                                     | 0.05 |
| IPI00413270 | TLE1    | transducin-like enhancer protein 1.                                       | 0.04 |
| IPI00386923 | SRC     | 13 kda protein.                                                           | 0.03 |
| IPI00064262 | DCHS1   | protocadherin-16 precursor.                                               | 0.02 |
| IPI00296139 | DDX25   | isoform 1 of atp-dependent rna helicase ddx25.                            | 0.02 |
| IPI00304654 | ASXL3   | similar to additional sex combs like 2 isoform 1.                         | 0.02 |
| IPI00039680 | SLCO4A1 | isoform 2 of solute carrier organic anion transporter family member4a1.   | 0.00 |

**\* Proteins listed in bold were not found in our previous proteomics experiment done with the same IPAS platform and they had antibodies available for their receptors**

**Supplemental Table 2: Study patients' characteristics**

|                                                 | <b>GI-GVHD</b> | <b>No GVHD</b> | <b>Non-GVHD<br/>Enteritis</b> | <b>Skin first<br/>GVHD</b> | <b>Skin GVHD<br/>Only</b> |                |
|-------------------------------------------------|----------------|----------------|-------------------------------|----------------------------|---------------------------|----------------|
| <b>Total, n = 214</b>                           | <b>n = 71</b>  | <b>n = 48</b>  | <b>n = 33</b>                 | <b>n = 22</b>              | <b>n = 40</b>             | <b>p-value</b> |
| Median age                                      | 47 (0-65)      | 48 (2-67)      | 42 (3-65)                     | 47 (7-66)                  | 52 (1-65)                 | 0.44           |
| <b>Disease, %</b>                               |                |                |                               |                            |                           |                |
| Malignant                                       | 96 (n = 68)    | 92 (n = 44)    | 91 (n = 30)                   | 96 (n = 21)                | 93 (n = 37)               | 0.84           |
| Other                                           | 4 (n = 3)      | 8 (n = 4)      | 9 (n = 3)                     | 4 (n = 1)                  | 7 (n = 3)                 |                |
| <b>Disease status at<br/>transplantation, %</b> |                |                |                               |                            |                           |                |
| Low/intermediate risk                           | 58 (n = 41)    | 69 (n = 33)    | 57 (n = 19)                   | 54 (n = 12)                | 72 (n = 29)               | 0.39           |
| High risk                                       | 42 (n = 30)    | 31 (n = 15)    | 43 (n = 14)                   | 46 (n = 10)                | 28 (n = 19)               |                |
| <b>Donor type, %</b>                            |                |                |                               |                            |                           |                |
| Related donor                                   | 44 (n = 31)    | 67 (n = 32)    | 57 (n = 19)                   | 32 (n = 7)                 | 45 (n = 18)               | 0.03           |
| Unrelated donor                                 | 56 (n = 40)    | 33 (n = 16)    | 43 (n = 14)                   | 68 (n = 15)                | 55 (n = 22)               |                |
| <b>Donor match, %</b>                           |                |                |                               |                            |                           |                |
| Matched donor                                   | 75 (n = 53)    | 87 (n = 42)    | 88 (n = 29)                   | 73 (n = 16)                | 85 (n = 34)               | 0.17           |
| Mismatched donor                                | 25 (n = 18)    | 13 (n = 6)     | 12 (n = 4)                    | 27 (n = 6)                 | 25 (n = 6)                |                |
| <b>Graft source, %</b>                          |                |                |                               |                            |                           | 0.18           |
| PBSC                                            | 85 (n = 60)    | 85 (n = 41)    | 94 (n = 31)                   | 82 (n = 18)                | 95 (n = 38)               |                |
| BM                                              | 11 (n = 8)     | 15 (n = 7)     | 6 (n = 2)                     | 9 (n = 2)                  | 5 (n = 2)                 |                |
| UCB                                             | 4 (n = 3)      | 0 (n = 0)      | 0 (n = 0)                     | 9 (n = 2)                  | 0 (n = 0)                 |                |
| <b>Conditioning regimen<br/>intensity, %</b>    |                |                |                               |                            |                           |                |
| High intensity§                                 | 62 (n = 44)    | 73 (n = 35)    | 70 (n = 23)                   | 64 (n = 14)                | 62 (n = 25)               | 0.73           |
| Reduced intensity¶                              | 38 (n = 27)    | 27 (n = 13)    | 30 (n = 10)                   | 36 (n = 8)                 | 38 (n = 15)               |                |

|                                  |             |              |              |             |             |      |
|----------------------------------|-------------|--------------|--------------|-------------|-------------|------|
| <b>Median after HCT (range)</b>  | 29 (11-92)  | 30 (14-131)  | 28 (13-78)   | 29 (10-85)  | 28 (7-100)  | 0.54 |
| <b>Stage of GVHD at onset, %</b> |             |              |              |             |             |      |
| 0                                | 0 (n = 0)   | 100 (n = 48) | 100 (n = 33) | 0 (n = 0)   | 0 (n = 0)   | n/a  |
| I                                | 0 (n = 0)   | 0 (n = 0)    | 0 (n = 0)    | 50 (n = 11) | 75 (n = 30) |      |
| Skin stage 1                     | 0 (n = 0)   | 0 (n = 0)    | 0 (n = 0)    | 27 (n = 6)  | 45 (n = 18) |      |
| Skin stage 2                     | 0 (n = 0)   | 0 (n = 0)    | 0 (n = 0)    | 23 (n = 5)  | 30 (n = 12) |      |
| II                               | 65 (n = 46) | 0 (n = 0)    | 0 (n = 0)    | 45 (n = 10) | 25 (n = 10) |      |
| Isolated skin stage 3            | 0 (n = 0)   | 0 (n = 0)    | 0 (n = 0)    | 45 (n = 10) | 25 (n = 10) |      |
| Isolated upper GI stage 1        | 24 (n = 17) | 0 (n = 0)    | 0 (n = 0)    | 0 (n = 0)   | 0 (n = 0)   |      |
| Lower GI stage 1                 | 41 (n = 29) | 0 (n = 0)    | 0 (n = 0)    | 0 (n = 0)   | 0 (n = 0)   |      |
| III-IV                           | 35 (n = 25) | 0 (n = 0)    | 0 (n = 0)    | 0 (n = 0)   | 0 (n = 0)   |      |
| Isolated skin stage 4            | 0 (n = 0)   | 0 (n = 0)    | 0 (n = 0)    | 0 (n = 0)   | 0 (n = 0)   |      |
| GI stage 1                       | 1 (n = 1)   | 0 (n = 0)    | 0 (n = 0)    | 0 (n = 0)   | 0 (n = 0)   |      |
| GI stage 2                       | 10 (n = 7)  | 0 (n = 0)    | 0 (n = 0)    | 0 (n = 0)   | 0 (n = 0)   |      |
| GI stage 3                       | 10 (n = 7)  | 0 (n = 0)    | 0 (n = 0)    | 0 (n = 0)   | 0 (n = 0)   |      |
| GI stage 4                       | 14 (n = 10) | 0 (n = 0)    | 0 (n = 0)    | 0 (n = 0)   | 0 (n = 0)   |      |

§High Intensity conditioning regimens include: BAC, CyTBI, BuCy2, CVB, CloBu4, BuCy4, FluMel, BEAM, FluCy, CyTLI, FluCyTBI, ThioCyTBI, Mel, ThioCy, CyATG, Cy/TLI/ATG, Cy

¶Reduced intensity conditioning regimens include: FluBu2, FluBu4, TLI/ATG, FluMelATG

**Supplemental Table 3. Causes of non-GVHD enteritis in the validation set****Non-GVHD lower GI enteritis +/- upper GI symptoms: n=25**

|                                                                       |            |
|-----------------------------------------------------------------------|------------|
| <i>Clostridium difficile</i> infection                                | 39% (n=13) |
| Diarrhea w/ negative biopsy (no other etiology)                       | 21% (n=7)  |
| Nausea/vomiting and diarrhea w/ negative biopsies (no other etiology) | 12% (n=4)  |
| Ulcerative esophagitis and diarrhea (negative biopsies)               | 3% (n=1)   |

**Non-GVHD upper GI enteritis without diarrhea (all biopsy negative): n=8**

|                                      |           |
|--------------------------------------|-----------|
| Nausea/vomiting                      | 15% (n=5) |
| Anorexia                             | 3% (n=1)  |
| Chemical gastropathy                 | 3% (n=1)  |
| <i>Helicobacter pylori</i> gastritis | 3% (n=1)  |



**Supplemental Table 4. Transcriptome analysis of sorted human CD146+CCR5+ Tcons and the T-cell population excluding CD146+CCR5+ Tcons.**

| <b>Gene</b>      | <b>Tcons double positive for CD146 CCR5</b> | <b>Tcons double positive for CD146 CCR5</b> | <b>Tcons double positive for CD146 CCR5</b> | <b>Average Tcons double positive CD146 CCR5</b> | <b>Tcons negative for CD146 CCR5</b> | <b>Tcons negative for CD146 CCR5</b> | <b>Tcons negative for CD146 CCR5</b> | <b>Average Tcons negative for CD146 CCR5</b> | <b>Fold difference in double positive CD146CCR5+ Tcons vs. T cells negative for CD146CCR5+</b> |
|------------------|---------------------------------------------|---------------------------------------------|---------------------------------------------|-------------------------------------------------|--------------------------------------|--------------------------------------|--------------------------------------|----------------------------------------------|------------------------------------------------------------------------------------------------|
| <b>CXCR6</b>     | 39                                          | 30                                          | 35                                          | 35                                              | 7                                    | 10                                   | 8                                    | 8                                            | <b>4.16</b>                                                                                    |
| <b>RORC</b>      | 186                                         | 140                                         | 149                                         | 158                                             | 45                                   | 36                                   | 37                                   | 39                                           | <b>4.03</b>                                                                                    |
| <b>MS4A1</b>     | 114                                         | 100                                         | 77                                          | 97                                              | 21                                   | 31                                   | 29                                   | 27                                           | <b>3.59</b>                                                                                    |
| <b>PAX5</b>      | 28                                          | 25                                          | 35                                          | 29                                              | 7                                    | 10                                   | 9                                    | 9                                            | <b>3.38</b>                                                                                    |
| <b>CD79A</b>     | 98                                          | 76                                          | 90                                          | 88                                              | 31                                   | 34                                   | 23                                   | 29                                           | <b>3.00</b>                                                                                    |
| <b>CCR6</b>      | 541                                         | 483                                         | 476                                         | 500                                             | 195                                  | 164                                  | 171                                  | 177                                          | <b>2.83</b>                                                                                    |
| <b>IL23R</b>     | 62                                          | 60                                          | 66                                          | 63                                              | 17                                   | 26                                   | 24                                   | 22                                           | <b>2.81</b>                                                                                    |
| <b>PDCD1</b>     | 32                                          | 28                                          | 31                                          | 30                                              | 15                                   | 9                                    | 10                                   | 11                                           | <b>2.68</b>                                                                                    |
| <b>CD22</b>      | 42                                          | 61                                          | 50                                          | 51                                              | 19                                   | 19                                   | 20                                   | 19                                           | <b>2.64</b>                                                                                    |
| <b>IL18RAP</b>   | 138                                         | 119                                         | 139                                         | 132                                             | 45                                   | 60                                   | 48                                   | 51                                           | <b>2.59</b>                                                                                    |
| <b>CFH</b>       | 139                                         | 122                                         | 150                                         | 137                                             | 60                                   | 53                                   | 52                                   | 55                                           | <b>2.49</b>                                                                                    |
| <b>GZMA</b>      | 619                                         | 463                                         | 552                                         | 545                                             | 211                                  | 225                                  | 221                                  | 219                                          | <b>2.49</b>                                                                                    |
| <b>IL18R1</b>    | 216                                         | 202                                         | 205                                         | 208                                             | 94                                   | 93                                   | 73                                   | 87                                           | <b>2.40</b>                                                                                    |
| <b>CCL20</b>     | 64                                          | 47                                          | 44                                          | 52                                              | 24                                   | 25                                   | 17                                   | 22                                           | <b>2.35</b>                                                                                    |
| <b>CD209</b>     | 8                                           | 8                                           | 5                                           | 7                                               | 2                                    | 5                                    | 2                                    | 3                                            | <b>2.33</b>                                                                                    |
| <b>ABCB1</b>     | 263                                         | 226                                         | 223                                         | 237                                             | 104                                  | 101                                  | 102                                  | 102                                          | <b>2.32</b>                                                                                    |
| <b>CXCR3</b>     | 227                                         | 218                                         | 224                                         | 223                                             | 99                                   | 107                                  | 85                                   | 97                                           | <b>2.30</b>                                                                                    |
| <b>TNFRSF4</b>   | 189                                         | 163                                         | 192                                         | 181                                             | 90                                   | 73                                   | 86                                   | 83                                           | <b>2.18</b>                                                                                    |
| <b>AIRE</b>      | 31                                          | 30                                          | 25                                          | 29                                              | 12                                   | 17                                   | 11                                   | 13                                           | <b>2.15</b>                                                                                    |
| <b>KLRB1</b>     | 2604                                        | 2130                                        | 2261                                        | 2332                                            | 1078                                 | 1107                                 | 1078                                 | 1088                                         | <b>2.14</b>                                                                                    |
| <b>KIT</b>       | 21                                          | 18                                          | 43                                          | 27                                              | 13                                   | 18                                   | 9                                    | 13                                           | <b>2.05</b>                                                                                    |
| <b>LILRB4</b>    | 17                                          | 12                                          | 30                                          | 20                                              | 2                                    | 15                                   | 12                                   | 10                                           | <b>2.03</b>                                                                                    |
| <b>CCL5</b>      | 865                                         | 748                                         | 736                                         | 783                                             | 425                                  | 364                                  | 390                                  | 393                                          | <b>1.99</b>                                                                                    |
| <b>TNFAIP3</b>   | 14976                                       | 12942                                       | 13035                                       | 13651                                           | 7824                                 | 7062                                 | 6948                                 | 7278                                         | <b>1.88</b>                                                                                    |
| <b>PRDM1</b>     | 588                                         | 486                                         | 563                                         | 546                                             | 332                                  | 296                                  | 307                                  | 312                                          | <b>1.75</b>                                                                                    |
| <b>MAF</b>       | 457                                         | 427                                         | 411                                         | 432                                             | 252                                  | 239                                  | 255                                  | 249                                          | <b>1.74</b>                                                                                    |
| <b>TBX21</b>     | 168                                         | 174                                         | 165                                         | 169                                             | 99                                   | 102                                  | 99                                   | 100                                          | <b>1.69</b>                                                                                    |
| <b>PTPN22</b>    | 309                                         | 257                                         | 321                                         | 296                                             | 138                                  | 214                                  | 184                                  | 179                                          | <b>1.65</b>                                                                                    |
| <b>CD19</b>      | 15                                          | 16                                          | 20                                          | 17                                              | 10                                   | 13                                   | 8                                    | 10                                           | <b>1.65</b>                                                                                    |
| <b>CEACAM1</b>   | 17                                          | 9                                           | 5                                           | 10                                              | 5                                    | 10                                   | 4                                    | 6                                            | <b>1.63</b>                                                                                    |
| <b>TNFRSF11A</b> | 9                                           | 18                                          | 17                                          | 15                                              | 9                                    | 10                                   | 8                                    | 9                                            | <b>1.63</b>                                                                                    |
| <b>SLAMF1</b>    | 69                                          | 66                                          | 74                                          | 70                                              | 42                                   | 48                                   | 42                                   | 44                                           | <b>1.58</b>                                                                                    |
| <b>GP1BB</b>     | 33                                          | 30                                          | 32                                          | 32                                              | 27                                   | 15                                   | 21                                   | 21                                           | <b>1.51</b>                                                                                    |

|                 |      |      |      |      |      |      |      |      |             |
|-----------------|------|------|------|------|------|------|------|------|-------------|
| <b>PIGR</b>     | 2    | 5    | 2    | 3    | 1    | 3    | 2    | 2    | <b>1.50</b> |
| <b>CD58</b>     | 280  | 234  | 266  | 260  | 176  | 184  | 164  | 175  | <b>1.49</b> |
| <b>TRAF4</b>    | 225  | 202  | 205  | 211  | 147  | 137  | 144  | 143  | <b>1.48</b> |
| <b>CCR5</b>     | 19   | 19   | 15   | 18   | 10   | 13   | 13   | 12   | <b>1.47</b> |
| <b>CXCL11</b>   | 5    | 3    | 8    | 5    | 3    | 6    | 2    | 4    | <b>1.45</b> |
| <b>TNFRSF8</b>  | 10   | 11   | 25   | 15   | 14   | 12   | 6    | 11   | <b>1.44</b> |
| <b>GATA3</b>    | 60   | 67   | 61   | 63   | 46   | 50   | 37   | 44   | <b>1.41</b> |
| <b>TGFB1</b>    | 5660 | 4902 | 5344 | 5302 | 4054 | 3517 | 3731 | 3767 | <b>1.41</b> |
| <b>CD274</b>    | 14   | 12   | 9    | 12   | 9    | 10   | 6    | 8    | <b>1.40</b> |
| <b>CLU</b>      | 2    | 10   | 9    | 7    | 3    | 9    | 3    | 5    | <b>1.40</b> |
| <b>GFI1</b>     | 87   | 75   | 84   | 82   | 56   | 62   | 58   | 59   | <b>1.40</b> |
| <b>IL32</b>     | 5488 | 6048 | 8219 | 6585 | 2376 | 7574 | 4235 | 4728 | <b>1.39</b> |
| <b>IL2RB</b>    | 651  | 588  | 595  | 611  | 449  | 466  | 410  | 442  | <b>1.38</b> |
| <b>MAPKAPK2</b> | 600  | 477  | 567  | 548  | 413  | 374  | 401  | 396  | <b>1.38</b> |
| <b>IFIH1</b>    | 117  | 121  | 93   | 110  | 79   | 90   | 75   | 81   | <b>1.36</b> |
| <b>MAPK11</b>   | 52   | 43   | 42   | 46   | 42   | 29   | 30   | 34   | <b>1.36</b> |
| <b>PRF1</b>     | 448  | 402  | 436  | 429  | 329  | 317  | 309  | 318  | <b>1.35</b> |
| <b>CDKN1A</b>   | 1002 | 926  | 979  | 969  | 720  | 694  | 747  | 720  | <b>1.35</b> |
| <b>CR1</b>      | 376  | 326  | 333  | 345  | 276  | 258  | 237  | 257  | <b>1.34</b> |
| <b>CCL11</b>    | 6    | 3    | 3    | 4    | 5    | 1    | 3    | 3    | <b>1.33</b> |
| <b>TNF</b>      | 312  | 256  | 247  | 272  | 208  | 230  | 180  | 206  | <b>1.32</b> |
| <b>DPP4</b>     | 171  | 152  | 167  | 163  | 141  | 114  | 118  | 124  | <b>1.31</b> |
| <b>ITGB1</b>    | 1964 | 1709 | 1690 | 1788 | 1387 | 1390 | 1308 | 1362 | <b>1.31</b> |
| <b>CCL24</b>    | 7    | 9    | 14   | 10   | 10   | 10   | 3    | 8    | <b>1.30</b> |
| <b>NFKB1</b>    | 390  | 374  | 385  | 383  | 330  | 278  | 273  | 294  | <b>1.30</b> |
| <b>MUC1</b>     | 28   | 34   | 33   | 32   | 25   | 24   | 24   | 24   | <b>1.30</b> |
| <b>GNLY</b>     | 390  | 346  | 356  | 364  | 281  | 291  | 268  | 280  | <b>1.30</b> |
| <b>HFE</b>      | 5    | 11   | 11   | 9    | 8    | 9    | 4    | 7    | <b>1.29</b> |
| <b>CSF1</b>     | 31   | 14   | 27   | 24   | 13   | 24   | 19   | 19   | <b>1.29</b> |
| <b>IL28B</b>    | 6    | 6    | 6    | 6    | 4    | 5    | 5    | 5    | <b>1.29</b> |
| <b>CD80</b>     | 12   | 13   | 12   | 12   | 10   | 12   | 7    | 10   | <b>1.28</b> |
| <b>C1S</b>      | 22   | 18   | 21   | 20   | 16   | 16   | 16   | 16   | <b>1.27</b> |
| <b>NOD2</b>     | 128  | 127  | 109  | 121  | 107  | 105  | 79   | 97   | <b>1.25</b> |
| <b>CD40</b>     | 14   | 19   | 12   | 15   | 11   | 14   | 11   | 12   | <b>1.25</b> |
| <b>TNFAIP6</b>  | 14   | 17   | 15   | 15   | 13   | 15   | 9    | 12   | <b>1.24</b> |
| <b>CD99</b>     | 1824 | 1594 | 1655 | 1691 | 1472 | 1329 | 1292 | 1364 | <b>1.24</b> |
| <b>IL9</b>      | 9    | 8    | 9    | 9    | 8    | 10   | 3    | 7    | <b>1.24</b> |
| <b>CCRL2</b>    | 6    | 6    | 9    | 7    | 4    | 9    | 4    | 6    | <b>1.24</b> |
| <b>AHR</b>      | 1004 | 877  | 895  | 925  | 772  | 742  | 740  | 751  | <b>1.23</b> |
| <b>IL1R1</b>    | 13   | 8    | 11   | 11   | 10   | 12   | 4    | 9    | <b>1.23</b> |
| <b>RAG2</b>     | 18   | 14   | 16   | 16   | 8    | 21   | 10   | 13   | <b>1.23</b> |
| <b>CCR10</b>    | 19   | 28   | 30   | 26   | 21   | 24   | 18   | 21   | <b>1.22</b> |
| <b>CD34</b>     | 1    | 4    | 6    | 4    | 2    | 5    | 2    | 3    | <b>1.22</b> |
| <b>IFNB1</b>    | 2    | 5    | 4    | 4    | 2    | 4    | 3    | 3    | <b>1.22</b> |

|                  |       |       |       |       |       |       |       |       |             |
|------------------|-------|-------|-------|-------|-------|-------|-------|-------|-------------|
| <b>KIR3DL2</b>   | 17    | 18    | 20    | 18    | 12    | 12    | 21    | 15    | <b>1.22</b> |
| <b>IRAK1</b>     | 691   | 577   | 581   | 616   | 535   | 479   | 510   | 508   | <b>1.21</b> |
| <b>LILRB1</b>    | 21    | 23    | 30    | 25    | 11    | 26    | 24    | 20    | <b>1.21</b> |
| <b>TNFSF12</b>   | 394   | 365   | 369   | 376   | 330   | 301   | 301   | 311   | <b>1.21</b> |
| <b>RELB</b>      | 177   | 174   | 175   | 175   | 158   | 136   | 142   | 145   | <b>1.21</b> |
| <b>BLNK</b>      | 10    | 12    | 8     | 10    | 8     | 9     | 8     | 8     | <b>1.20</b> |
| <b>C4BPA</b>     | 2     | 2     | 2     | 2     | 1     | 3     | 1     | 2     | <b>1.20</b> |
| <b>CXCL12</b>    | 4     | 1     | 1     | 2     | 1     | 2     | 2     | 2     | <b>1.20</b> |
| <b>IL22</b>      | 2     | 3     | 1     | 2     | 1     | 3     | 1     | 2     | <b>1.20</b> |
| <b>KIR3DL3</b>   | 2     | 3     | 1     | 2     | 1     | 3     | 1     | 2     | <b>1.20</b> |
| <b>PDGFB</b>     | 2     | 8     | 2     | 4     | 2     | 4     | 4     | 3     | <b>1.20</b> |
| <b>IL2RG</b>     | 1924  | 1697  | 1667  | 1763  | 1568  | 1398  | 1446  | 1471  | <b>1.20</b> |
| <b>NCF4</b>      | 162   | 135   | 149   | 149   | 119   | 120   | 134   | 124   | <b>1.20</b> |
| <b>FOXP3</b>     | 15    | 19    | 16    | 17    | 14    | 18    | 10    | 14    | <b>1.19</b> |
| <b>BATF</b>      | 43    | 32    | 38    | 38    | 31    | 36    | 28    | 32    | <b>1.19</b> |
| <b>TRAF3</b>     | 174   | 157   | 128   | 153   | 129   | 126   | 131   | 129   | <b>1.19</b> |
| <b>KIR2DS5</b>   | 5     | 8     | 6     | 6     | 2     | 9     | 5     | 5     | <b>1.19</b> |
| <b>NFKBIA</b>    | 6219  | 5336  | 6164  | 5906  | 5110  | 5014  | 4877  | 5000  | <b>1.18</b> |
| <b>GUSB</b>      | 102   | 110   | 103   | 105   | 89    | 90    | 88    | 89    | <b>1.18</b> |
| <b>CD81</b>      | 977   | 803   | 844   | 875   | 740   | 784   | 702   | 742   | <b>1.18</b> |
| <b>STAT4</b>     | 763   | 687   | 670   | 707   | 571   | 624   | 604   | 600   | <b>1.18</b> |
| <b>TFRC</b>      | 715   | 636   | 674   | 675   | 546   | 594   | 586   | 575   | <b>1.17</b> |
| <b>HLA-A</b>     | 21287 | 18870 | 20133 | 20097 | 15965 | 18537 | 16973 | 17158 | <b>1.17</b> |
| <b>TNFRSF13C</b> | 185   | 146   | 161   | 164   | 144   | 135   | 142   | 140   | <b>1.17</b> |
| <b>TAGAP</b>     | 1100  | 991   | 1040  | 1044  | 889   | 971   | 829   | 896   | <b>1.16</b> |
| <b>SMAD5</b>     | 69    | 75    | 93    | 79    | 62    | 83    | 59    | 68    | <b>1.16</b> |
| <b>TNFRSF13B</b> | 9     | 14    | 6     | 10    | 6     | 10    | 9     | 8     | <b>1.16</b> |
| <b>CXCR4</b>     | 10020 | 8662  | 9231  | 9304  | 8284  | 7862  | 7936  | 8027  | <b>1.16</b> |
| <b>SKI</b>       | 1009  | 863   | 824   | 899   | 802   | 795   | 738   | 778   | <b>1.15</b> |
| <b>SH2D1A</b>    | 224   | 193   | 197   | 205   | 176   | 201   | 155   | 177   | <b>1.15</b> |
| <b>IFITM1</b>    | 4330  | 3864  | 4129  | 4108  | 3178  | 3940  | 3627  | 3582  | <b>1.15</b> |
| <b>IL2RA</b>     | 69    | 58    | 55    | 61    | 53    | 55    | 51    | 53    | <b>1.14</b> |
| <b>SLAMF7</b>    | 30    | 35    | 38    | 34    | 29    | 37    | 24    | 30    | <b>1.14</b> |
| <b>BCAP31</b>    | 588   | 516   | 528   | 544   | 488   | 452   | 494   | 478   | <b>1.14</b> |
| <b>CD59</b>      | 330   | 313   | 297   | 313   | 281   | 287   | 260   | 276   | <b>1.14</b> |
| <b>ITGAL</b>     | 740   | 649   | 672   | 687   | 607   | 675   | 548   | 610   | <b>1.13</b> |
| <b>IL12A</b>     | 29    | 22    | 31    | 27    | 24    | 23    | 26    | 24    | <b>1.12</b> |
| <b>IL23A</b>     | 61    | 59    | 55    | 58    | 52    | 54    | 50    | 52    | <b>1.12</b> |
| <b>CCR8</b>      | 9     | 9     | 10    | 9     | 10    | 10    | 5     | 8     | <b>1.12</b> |
| <b>B2M</b>       | 82970 | 72958 | 79432 | 78453 | 69694 | 71441 | 70329 | 70488 | <b>1.11</b> |
| <b>FCGR1A</b>    | 8     | 7     | 5     | 7     | 4     | 9     | 5     | 6     | <b>1.11</b> |
| <b>SMAD3</b>     | 484   | 376   | 409   | 423   | 379   | 390   | 378   | 382   | <b>1.11</b> |
| <b>CD82</b>      | 176   | 150   | 167   | 164   | 146   | 146   | 154   | 149   | <b>1.11</b> |
| <b>DEFB1</b>     | 2     | 8     | 11    | 7     | 5     | 9     | 5     | 6     | <b>1.11</b> |

|                 |       |       |       |       |       |       |       |       |             |
|-----------------|-------|-------|-------|-------|-------|-------|-------|-------|-------------|
| <b>KIR3DS1</b>  | 2     | 9     | 10    | 7     | 2     | 11    | 6     | 6     | <b>1.11</b> |
| <b>SOCS3</b>    | 958   | 885   | 919   | 921   | 735   | 951   | 816   | 834   | <b>1.10</b> |
| <b>IFNGR1</b>   | 417   | 371   | 333   | 374   | 308   | 375   | 334   | 339   | <b>1.10</b> |
| <b>CD97</b>     | 1898  | 1706  | 1735  | 1780  | 1724  | 1558  | 1567  | 1616  | <b>1.10</b> |
| <b>C3</b>       | 3     | 4     | 4     | 4     | 4     | 5     | 1     | 3     | <b>1.10</b> |
| <b>ADA</b>      | 217   | 186   | 149   | 184   | 173   | 183   | 146   | 167   | <b>1.10</b> |
| <b>IL10</b>     | 9     | 11    | 14    | 11    | 10    | 11    | 10    | 10    | <b>1.10</b> |
| <b>XBP1</b>     | 486   | 390   | 471   | 449   | 424   | 380   | 426   | 410   | <b>1.10</b> |
| <b>CXCL13</b>   | 5     | 5     | 2     | 4     | 3     | 5     | 3     | 4     | <b>1.09</b> |
| <b>ABCF1</b>    | 427   | 366   | 411   | 401   | 372   | 364   | 371   | 369   | <b>1.09</b> |
| <b>KIR2DS2</b>  | 11    | 8     | 6     | 8     | 9     | 9     | 5     | 8     | <b>1.09</b> |
| <b>MYD88</b>    | 691   | 538   | 639   | 623   | 601   | 551   | 570   | 574   | <b>1.08</b> |
| <b>TBK1</b>     | 91    | 91    | 89    | 90    | 87    | 74    | 89    | 83    | <b>1.08</b> |
| <b>MBP</b>      | 41    | 42    | 47    | 43    | 49    | 42    | 29    | 40    | <b>1.08</b> |
| <b>HLA-C</b>    | 14654 | 12456 | 12808 | 13306 | 12260 | 12306 | 12306 | 12291 | <b>1.08</b> |
| <b>MSR1</b>     | 50    | 40    | 47    | 46    | 39    | 44    | 44    | 42    | <b>1.08</b> |
| <b>CHUK</b>     | 349   | 322   | 359   | 343   | 339   | 316   | 300   | 318   | <b>1.08</b> |
| <b>NFATC2</b>   | 673   | 563   | 576   | 604   | 576   | 595   | 514   | 562   | <b>1.08</b> |
| <b>TNFRSF1B</b> | 394   | 351   | 302   | 349   | 351   | 340   | 283   | 325   | <b>1.07</b> |
| <b>HPRT1</b>    | 247   | 217   | 211   | 225   | 223   | 204   | 201   | 209   | <b>1.07</b> |
| <b>TNFSF13B</b> | 108   | 113   | 116   | 112   | 107   | 111   | 96    | 105   | <b>1.07</b> |
| <b>TLR7</b>     | 15    | 11    | 18    | 15    | 13    | 18    | 10    | 14    | <b>1.07</b> |
| <b>IL10RA</b>   | 1240  | 1145  | 1151  | 1179  | 1162  | 1090  | 1046  | 1099  | <b>1.07</b> |
| <b>IL26</b>     | 37    | 25    | 15    | 26    | 21    | 33    | 18    | 24    | <b>1.07</b> |
| <b>CD96</b>     | 1687  | 1433  | 1568  | 1563  | 1523  | 1398  | 1476  | 1466  | <b>1.07</b> |
| <b>MAP4K2</b>   | 606   | 556   | 553   | 572   | 538   | 549   | 522   | 536   | <b>1.07</b> |
| <b>CD8A</b>     | 107   | 100   | 117   | 108   | 116   | 94    | 94    | 101   | <b>1.07</b> |
| <b>BCL3</b>     | 774   | 680   | 591   | 682   | 676   | 646   | 598   | 640   | <b>1.07</b> |
| <b>LTB4R</b>    | 98    | 69    | 59    | 75    | 76    | 76    | 61    | 71    | <b>1.06</b> |
| <b>CCL8</b>     | 13    | 8     | 16    | 12    | 13    | 10    | 12    | 12    | <b>1.06</b> |
| <b>RARRES3</b>  | 482   | 408   | 485   | 458   | 401   | 474   | 427   | 434   | <b>1.06</b> |
| <b>BCL2</b>     | 1214  | 1079  | 1128  | 1140  | 1193  | 1029  | 1018  | 1080  | <b>1.06</b> |
| <b>ALAS1</b>    | 28    | 38    | 29    | 32    | 28    | 30    | 32    | 30    | <b>1.06</b> |
| <b>CXCL10</b>   | 9     | 5     | 6     | 7     | 4     | 10    | 5     | 6     | <b>1.05</b> |
| <b>ITLN1</b>    | 7     | 8     | 6     | 7     | 5     | 10    | 5     | 7     | <b>1.05</b> |
| <b>IL4R</b>     | 1113  | 979   | 1002  | 1031  | 1008  | 969   | 971   | 983   | <b>1.05</b> |
| <b>PDCD1LG2</b> | 5     | 8     | 9     | 7     | 6     | 11    | 4     | 7     | <b>1.05</b> |
| <b>PLA2G2E</b>  | 6     | 8     | 8     | 7     | 7     | 10    | 4     | 7     | <b>1.05</b> |
| <b>IRF1</b>     | 968   | 860   | 921   | 916   | 912   | 856   | 858   | 875   | <b>1.05</b> |
| <b>ATG16L1</b>  | 585   | 506   | 512   | 534   | 506   | 513   | 514   | 511   | <b>1.05</b> |
| <b>CD24</b>     | 9     | 8     | 6     | 8     | 4     | 9     | 9     | 7     | <b>1.05</b> |
| <b>SELPLG</b>   | 59    | 36    | 46    | 47    | 37    | 47    | 51    | 45    | <b>1.04</b> |
| <b>IGF2R</b>    | 103   | 90    | 93    | 95    | 94    | 89    | 91    | 91    | <b>1.04</b> |
| <b>ICAM3</b>    | 1605  | 1367  | 1502  | 1491  | 1517  | 1360  | 1414  | 1430  | <b>1.04</b> |

|                 |       |       |       |       |       |       |       |       |             |
|-----------------|-------|-------|-------|-------|-------|-------|-------|-------|-------------|
| <b>IL7R</b>     | 3808  | 3334  | 2917  | 3353  | 3288  | 3436  | 2928  | 3217  | <b>1.04</b> |
| <b>GAPDH</b>    | 3654  | 3196  | 3333  | 3394  | 3415  | 3100  | 3268  | 3261  | <b>1.04</b> |
| <b>RELA</b>     | 403   | 367   | 368   | 379   | 379   | 363   | 353   | 365   | <b>1.04</b> |
| <b>LITAF</b>    | 1377  | 1284  | 1276  | 1312  | 1264  | 1315  | 1220  | 1266  | <b>1.04</b> |
| <b>HLA-B</b>    | 23633 | 20630 | 21685 | 21983 | 22276 | 20686 | 20704 | 21222 | <b>1.04</b> |
| <b>PSMD7</b>    | 863   | 825   | 881   | 856   | 835   | 846   | 813   | 831   | <b>1.03</b> |
| <b>LTA</b>      | 120   | 116   | 128   | 121   | 113   | 127   | 115   | 118   | <b>1.03</b> |
| <b>FYN</b>      | 2013  | 1786  | 1828  | 1876  | 1965  | 1727  | 1798  | 1830  | <b>1.02</b> |
| <b>IFI35</b>    | 33    | 21    | 31    | 28    | 31    | 28    | 24    | 28    | <b>1.02</b> |
| <b>NFKB2</b>    | 471   | 414   | 397   | 427   | 457   | 407   | 389   | 418   | <b>1.02</b> |
| <b>CD5</b>      | 2093  | 1798  | 1768  | 1886  | 1952  | 1782  | 1805  | 1846  | <b>1.02</b> |
| <b>TRAF5</b>    | 131   | 91    | 125   | 116   | 120   | 110   | 110   | 113   | <b>1.02</b> |
| <b>TAPBP</b>    | 1877  | 1711  | 1823  | 1804  | 1844  | 1769  | 1695  | 1769  | <b>1.02</b> |
| <b>CASP8</b>    | 763   | 673   | 718   | 718   | 717   | 715   | 681   | 704   | <b>1.02</b> |
| <b>TRAF6</b>    | 390   | 354   | 374   | 373   | 389   | 355   | 354   | 366   | <b>1.02</b> |
| <b>ARHGDI B</b> | 8085  | 6913  | 7284  | 7427  | 7801  | 6989  | 7140  | 7310  | <b>1.02</b> |
| <b>CD53</b>     | 728   | 631   | 564   | 641   | 666   | 646   | 583   | 632   | <b>1.01</b> |
| <b>POLR2A</b>   | 1257  | 1116  | 1271  | 1215  | 1246  | 1182  | 1163  | 1197  | <b>1.01</b> |
| <b>CTSC</b>     | 561   | 449   | 517   | 509   | 534   | 498   | 473   | 502   | <b>1.01</b> |
| <b>PTPN2</b>    | 422   | 385   | 325   | 377   | 392   | 379   | 346   | 372   | <b>1.01</b> |
| <b>IRAK2</b>    | 21    | 27    | 28    | 25    | 25    | 27    | 23    | 25    | <b>1.01</b> |
| <b>STAT5A</b>   | 436   | 355   | 443   | 411   | 428   | 390   | 402   | 407   | <b>1.01</b> |
| <b>PSMB7</b>    | 719   | 687   | 667   | 691   | 690   | 728   | 634   | 684   | <b>1.01</b> |
| <b>CD44</b>     | 1194  | 1047  | 1117  | 1119  | 1185  | 1088  | 1052  | 1108  | <b>1.01</b> |
| <b>CD40LG</b>   | 142   | 127   | 122   | 130   | 128   | 135   | 125   | 129   | <b>1.01</b> |
| <b>CD6</b>      | 1347  | 1168  | 1069  | 1195  | 1240  | 1236  | 1084  | 1187  | <b>1.01</b> |
| <b>HLA-DPB1</b> | 702   | 715   | 701   | 706   | 582   | 819   | 703   | 701   | <b>1.01</b> |
| <b>MAP4K1</b>   | 502   | 456   | 399   | 452   | 486   | 434   | 429   | 450   | <b>1.01</b> |
| <b>IL12RB1</b>  | 131   | 124   | 121   | 125   | 127   | 116   | 131   | 125   | <b>1.01</b> |
| <b>ZAP70</b>    | 1402  | 1224  | 1404  | 1343  | 1343  | 1331  | 1337  | 1337  | <b>1.00</b> |
| <b>JAK2</b>     | 790   | 737   | 799   | 775   | 794   | 773   | 749   | 772   | <b>1.00</b> |
| <b>AICDA</b>    | 5     | 8     | 1     | 5     | 3     | 5     | 6     | 5     | <b>1.00</b> |
| <b>CCL15</b>    | 6     | 9     | 8     | 8     | 4     | 13    | 6     | 8     | <b>1.00</b> |
| <b>CCL2</b>     | 6     | 11    | 8     | 8     | 5     | 10    | 10    | 8     | <b>1.00</b> |
| <b>CCRL1</b>    | 2     | 1     | 1     | 1     | 2     | 1     | 1     | 1     | <b>1.00</b> |
| <b>CDH5</b>     | 6     | 3     | 10    | 6     | 4     | 9     | 6     | 6     | <b>1.00</b> |
| <b>CSF2</b>     | 2     | 9     | 2     | 4     | 4     | 6     | 3     | 4     | <b>1.00</b> |
| <b>DEFB103B</b> | 1     | 5     | 6     | 4     | 5     | 4     | 3     | 4     | <b>1.00</b> |
| <b>DEFB4A</b>   | 2     | 1     | 2     | 2     | 1     | 1     | 3     | 2     | <b>1.00</b> |
| <b>IFNA1</b>    | 1     | 1     | 1     | 1     | 1     | 1     | 1     | 1     | <b>1.00</b> |
| <b>ITGA2B</b>   | 24    | 16    | 28    | 23    | 23    | 23    | 22    | 23    | <b>1.00</b> |
| <b>KIR2DL1</b>  | 2     | 3     | 3     | 3     | 2     | 4     | 2     | 3     | <b>1.00</b> |
| <b>KIR2DL2</b>  | 4     | 3     | 4     | 4     | 3     | 6     | 2     | 4     | <b>1.00</b> |
| <b>MASP1</b>    | 6     | 6     | 5     | 6     | 6     | 7     | 4     | 6     | <b>1.00</b> |

|                 |      |      |      |      |      |      |      |      |             |
|-----------------|------|------|------|------|------|------|------|------|-------------|
| <b>SRC</b>      | 9    | 9    | 6    | 8    | 7    | 10   | 7    | 8    | <b>1.00</b> |
| <b>PTGER4</b>   | 518  | 483  | 472  | 491  | 496  | 524  | 454  | 491  | <b>1.00</b> |
| <b>CTLA4</b>    | 286  | 261  | 235  | 261  | 270  | 263  | 250  | 261  | <b>1.00</b> |
| <b>ITGA4</b>    | 512  | 424  | 430  | 455  | 481  | 455  | 433  | 456  | <b>1.00</b> |
| <b>GPI</b>      | 527  | 443  | 447  | 472  | 530  | 458  | 433  | 474  | <b>1.00</b> |
| <b>PSMC2</b>    | 594  | 492  | 570  | 552  | 569  | 570  | 524  | 554  | <b>1.00</b> |
| <b>CEBPB</b>    | 483  | 489  | 438  | 470  | 276  | 706  | 434  | 472  | <b>1.00</b> |
| <b>LTB4R2</b>   | 72   | 58   | 57   | 62   | 64   | 58   | 67   | 63   | <b>0.99</b> |
| <b>TMEM173</b>  | 691  | 622  | 639  | 651  | 691  | 633  | 649  | 658  | <b>0.99</b> |
| <b>PRKCD</b>    | 177  | 163  | 133  | 158  | 172  | 166  | 142  | 160  | <b>0.99</b> |
| <b>CD3D</b>     | 1660 | 1439 | 1252 | 1450 | 1477 | 1603 | 1343 | 1474 | <b>0.98</b> |
| <b>CD164</b>    | 826  | 754  | 744  | 775  | 837  | 772  | 755  | 788  | <b>0.98</b> |
| <b>TNFRSF14</b> | 460  | 476  | 473  | 470  | 501  | 460  | 473  | 478  | <b>0.98</b> |
| <b>FCGR2B</b>   | 41   | 33   | 34   | 36   | 40   | 40   | 30   | 37   | <b>0.98</b> |
| <b>JAK1</b>     | 2613 | 2267 | 2326 | 2402 | 2592 | 2418 | 2336 | 2449 | <b>0.98</b> |
| <b>ICAM2</b>    | 456  | 371  | 433  | 420  | 470  | 402  | 421  | 431  | <b>0.97</b> |
| <b>HLA-DQB1</b> | 87   | 81   | 90   | 86   | 74   | 107  | 84   | 88   | <b>0.97</b> |
| <b>CD83</b>     | 915  | 781  | 853  | 850  | 914  | 846  | 863  | 874  | <b>0.97</b> |
| <b>PSMB8</b>    | 796  | 620  | 716  | 711  | 740  | 729  | 726  | 732  | <b>0.97</b> |
| <b>PPIA</b>     | 260  | 238  | 297  | 265  | 282  | 262  | 277  | 274  | <b>0.97</b> |
| <b>CR2</b>      | 11   | 10   | 9    | 10   | 10   | 12   | 9    | 10   | <b>0.97</b> |
| <b>CD2</b>      | 465  | 415  | 452  | 444  | 472  | 463  | 446  | 460  | <b>0.96</b> |
| <b>CD4</b>      | 660  | 563  | 594  | 606  | 718  | 542  | 625  | 628  | <b>0.96</b> |
| <b>PPBP</b>     | 202  | 196  | 175  | 191  | 217  | 177  | 201  | 198  | <b>0.96</b> |
| <b>IFIT2</b>    | 61   | 43   | 51   | 52   | 52   | 52   | 57   | 54   | <b>0.96</b> |
| <b>IL1RAP</b>   | 76   | 60   | 69   | 68   | 72   | 76   | 65   | 71   | <b>0.96</b> |
| <b>TUBB</b>     | 512  | 448  | 433  | 464  | 484  | 485  | 479  | 483  | <b>0.96</b> |
| <b>NCR1</b>     | 23   | 25   | 26   | 25   | 27   | 28   | 22   | 26   | <b>0.96</b> |
| <b>SDHA</b>     | 460  | 471  | 498  | 476  | 436  | 545  | 507  | 496  | <b>0.96</b> |
| <b>SPP1</b>     | 6    | 7    | 8    | 7    | 6    | 10   | 6    | 7    | <b>0.95</b> |
| <b>CD46</b>     | 907  | 906  | 794  | 869  | 950  | 946  | 839  | 912  | <b>0.95</b> |
| <b>TIRAP</b>    | 32   | 26   | 39   | 32   | 32   | 39   | 31   | 34   | <b>0.95</b> |
| <b>STAT5B</b>   | 937  | 852  | 937  | 909  | 976  | 988  | 912  | 959  | <b>0.95</b> |
| <b>ILF3</b>     | 2266 | 2037 | 2029 | 2111 | 2278 | 2295 | 2111 | 2228 | <b>0.95</b> |
| <b>KLRD1</b>    | 48   | 54   | 50   | 51   | 42   | 72   | 47   | 54   | <b>0.94</b> |
| <b>IFI16</b>    | 257  | 229  | 273  | 253  | 289  | 267  | 248  | 268  | <b>0.94</b> |
| <b>PSMB9</b>    | 510  | 428  | 489  | 476  | 508  | 534  | 470  | 504  | <b>0.94</b> |
| <b>TAP1</b>     | 160  | 124  | 135  | 140  | 173  | 150  | 121  | 148  | <b>0.94</b> |
| <b>C1QBP</b>    | 509  | 441  | 435  | 462  | 505  | 513  | 452  | 490  | <b>0.94</b> |
| <b>IRF7</b>     | 236  | 193  | 210  | 213  | 235  | 225  | 219  | 226  | <b>0.94</b> |
| <b>POU2F2</b>   | 302  | 264  | 247  | 271  | 311  | 275  | 278  | 288  | <b>0.94</b> |
| <b>PTPRC</b>    | 4955 | 4271 | 4888 | 4705 | 5201 | 4983 | 4823 | 5002 | <b>0.94</b> |
| <b>CASP1</b>    | 278  | 245  | 268  | 264  | 276  | 290  | 276  | 281  | <b>0.94</b> |
| <b>TOLLIP</b>   | 98   | 87   | 109  | 98   | 112  | 94   | 107  | 104  | <b>0.94</b> |

|                |       |       |       |       |       |       |       |       |             |
|----------------|-------|-------|-------|-------|-------|-------|-------|-------|-------------|
| <b>MAPK1</b>   | 452   | 400   | 409   | 420   | 476   | 425   | 443   | 448   | <b>0.94</b> |
| <b>PSMB5</b>   | 4     | 7     | 4     | 5     | 5     | 5     | 6     | 5     | <b>0.94</b> |
| <b>IKBKG</b>   | 220   | 187   | 205   | 204   | 223   | 188   | 242   | 218   | <b>0.94</b> |
| <b>TCF4</b>    | 7     | 13    | 9     | 10    | 8     | 10    | 13    | 10    | <b>0.94</b> |
| <b>CTSG</b>    | 3     | 3     | 8     | 5     | 4     | 8     | 3     | 5     | <b>0.93</b> |
| <b>IL3</b>     | 3     | 16    | 9     | 9     | 7     | 13    | 10    | 10    | <b>0.93</b> |
| <b>EEF1G</b>   | 15117 | 13383 | 13612 | 14037 | 15636 | 14905 | 14582 | 15041 | <b>0.93</b> |
| <b>NCAM1</b>   | 19    | 23    | 26    | 23    | 21    | 26    | 26    | 24    | <b>0.93</b> |
| <b>IL11RA</b>  | 529   | 439   | 446   | 471   | 553   | 474   | 492   | 506   | <b>0.93</b> |
| <b>CD3E</b>    | 2726  | 2411  | 2490  | 2542  | 2825  | 2540  | 2842  | 2736  | <b>0.93</b> |
| <b>IL29</b>    | 2     | 5     | 6     | 4     | 4     | 6     | 4     | 5     | <b>0.93</b> |
| <b>IL5</b>     | 4     | 5     | 4     | 4     | 4     | 5     | 5     | 5     | <b>0.93</b> |
| <b>TLR3</b>    | 8     | 14    | 3     | 8     | 10    | 10    | 7     | 9     | <b>0.93</b> |
| <b>OAZ1</b>    | 1527  | 1350  | 1241  | 1373  | 1485  | 1553  | 1410  | 1483  | <b>0.93</b> |
| <b>TNFSF15</b> | 11    | 14    | 12    | 12    | 16    | 10    | 14    | 13    | <b>0.93</b> |
| <b>POLR1B</b>  | 35    | 34    | 40    | 36    | 42    | 36    | 40    | 39    | <b>0.92</b> |
| <b>CCL26</b>   | 3     | 5     | 4     | 4     | 3     | 7     | 3     | 4     | <b>0.92</b> |
| <b>IL6</b>     | 5     | 3     | 4     | 4     | 2     | 9     | 2     | 4     | <b>0.92</b> |
| <b>LILRB5</b>  | 4     | 9     | 11    | 8     | 8     | 10    | 8     | 9     | <b>0.92</b> |
| <b>BID</b>     | 111   | 106   | 105   | 107   | 125   | 111   | 113   | 116   | <b>0.92</b> |
| <b>RPL19</b>   | 19487 | 17894 | 16842 | 18074 | 20405 | 20344 | 18027 | 19592 | <b>0.92</b> |
| <b>IFNG</b>    | 21    | 14    | 24    | 20    | 19    | 22    | 23    | 21    | <b>0.92</b> |
| <b>IRF8</b>    | 72    | 73    | 61    | 69    | 73    | 84    | 67    | 75    | <b>0.92</b> |
| <b>C8G</b>     | 13    | 11    | 10    | 11    | 10    | 15    | 12    | 12    | <b>0.92</b> |
| <b>TLR2</b>    | 65    | 59    | 56    | 60    | 57    | 93    | 46    | 65    | <b>0.92</b> |
| <b>CMKLR1</b>  | 13    | 14    | 17    | 15    | 17    | 21    | 10    | 16    | <b>0.92</b> |
| <b>CISH</b>    | 20    | 21    | 13    | 18    | 17    | 26    | 16    | 20    | <b>0.92</b> |
| <b>IL15</b>    | 27    | 16    | 21    | 21    | 25    | 21    | 24    | 23    | <b>0.91</b> |
| <b>STAT3</b>   | 904   | 765   | 846   | 838   | 992   | 886   | 875   | 918   | <b>0.91</b> |
| <b>IRAK4</b>   | 342   | 300   | 372   | 338   | 382   | 336   | 393   | 370   | <b>0.91</b> |
| <b>TNFRSF9</b> | 12    | 8     | 11    | 10    | 14    | 10    | 10    | 11    | <b>0.91</b> |
| <b>MAPK14</b>  | 312   | 253   | 249   | 271   | 309   | 317   | 269   | 298   | <b>0.91</b> |
| <b>C7</b>      | 17    | 19    | 24    | 20    | 14    | 37    | 15    | 22    | <b>0.91</b> |
| <b>NOS2</b>    | 9     | 11    | 10    | 10    | 8     | 14    | 11    | 11    | <b>0.91</b> |
| <b>STAT2</b>   | 455   | 382   | 390   | 409   | 471   | 435   | 449   | 452   | <b>0.91</b> |
| <b>ICOSLG</b>  | 107   | 110   | 108   | 108   | 115   | 123   | 121   | 120   | <b>0.91</b> |
| <b>CD48</b>    | 3373  | 2907  | 3078  | 3119  | 3585  | 3356  | 3406  | 3449  | <b>0.90</b> |
| <b>KIR3DL1</b> | 28    | 30    | 26    | 28    | 32    | 30    | 31    | 31    | <b>0.90</b> |
| <b>SIGIRR</b>  | 1244  | 1050  | 1159  | 1151  | 1261  | 1276  | 1297  | 1278  | <b>0.90</b> |
| <b>CIITA</b>   | 33    | 30    | 36    | 33    | 32    | 45    | 33    | 37    | <b>0.90</b> |
| <b>CLEC5A</b>  | 6     | 8     | 4     | 6     | 7     | 11    | 2     | 7     | <b>0.90</b> |
| <b>IL21</b>    | 2     | 3     | 4     | 3     | 4     | 3     | 3     | 3     | <b>0.90</b> |
| <b>LIF</b>     | 5     | 3     | 1     | 3     | 2     | 2     | 6     | 3     | <b>0.90</b> |
| <b>TGFBR1</b>  | 148   | 159   | 142   | 150   | 157   | 173   | 169   | 166   | <b>0.90</b> |

|                 |      |      |      |      |      |      |      |      |             |
|-----------------|------|------|------|------|------|------|------|------|-------------|
| <b>TAP2</b>     | 168  | 165  | 113  | 149  | 164  | 173  | 159  | 165  | <b>0.90</b> |
| <b>IKZF2</b>    | 24   | 22   | 24   | 23   | 26   | 27   | 25   | 26   | <b>0.90</b> |
| <b>TLR1</b>     | 118  | 140  | 131  | 130  | 156  | 156  | 122  | 145  | <b>0.90</b> |
| <b>CD9</b>      | 39   | 30   | 43   | 37   | 38   | 49   | 38   | 42   | <b>0.90</b> |
| <b>TYK2</b>     | 312  | 241  | 281  | 278  | 312  | 328  | 293  | 311  | <b>0.89</b> |
| <b>BCL6</b>     | 261  | 226  | 279  | 255  | 271  | 297  | 291  | 286  | <b>0.89</b> |
| <b>LY96</b>     | 60   | 58   | 68   | 62   | 73   | 64   | 72   | 70   | <b>0.89</b> |
| <b>IKZF1</b>    | 351  | 326  | 333  | 337  | 377  | 381  | 378  | 379  | <b>0.89</b> |
| <b>C1QA</b>     | 2    | 2    | 4    | 3    | 2    | 4    | 3    | 3    | <b>0.89</b> |
| <b>IL17A</b>    | 2    | 3    | 3    | 3    | 2    | 5    | 2    | 3    | <b>0.89</b> |
| <b>PDGFRB</b>   | 6    | 8    | 10   | 8    | 5    | 14   | 8    | 9    | <b>0.89</b> |
| <b>CD74</b>     | 6389 | 5569 | 5013 | 5657 | 6799 | 6538 | 5859 | 6399 | <b>0.88</b> |
| <b>HLA-DPA1</b> | 1162 | 1047 | 1037 | 1082 | 1232 | 1251 | 1190 | 1224 | <b>0.88</b> |
| <b>KIR2DL3</b>  | 13   | 16   | 14   | 14   | 15   | 18   | 16   | 16   | <b>0.88</b> |
| <b>CTNNB1</b>   | 1644 | 1399 | 1357 | 1467 | 1798 | 1637 | 1580 | 1672 | <b>0.88</b> |
| <b>NFATC3</b>   | 587  | 562  | 537  | 562  | 613  | 694  | 616  | 641  | <b>0.88</b> |
| <b>ICAM1</b>    | 70   | 66   | 62   | 66   | 74   | 78   | 74   | 75   | <b>0.88</b> |
| <b>GZMB</b>     | 172  | 172  | 161  | 168  | 182  | 206  | 189  | 192  | <b>0.88</b> |
| <b>ITGB2</b>    | 2186 | 1978 | 2069 | 2078 | 2441 | 2338 | 2350 | 2376 | <b>0.87</b> |
| <b>STAT6</b>    | 1140 | 1012 | 941  | 1031 | 1256 | 1167 | 1116 | 1180 | <b>0.87</b> |
| <b>KIR2DL5A</b> | 13   | 16   | 12   | 14   | 12   | 17   | 18   | 16   | <b>0.87</b> |
| <b>PDCD2</b>    | 217  | 195  | 233  | 215  | 250  | 252  | 238  | 247  | <b>0.87</b> |
| <b>IKBKB</b>    | 98   | 80   | 87   | 88   | 102  | 105  | 98   | 102  | <b>0.87</b> |
| <b>ABL1</b>     | 102  | 94   | 99   | 98   | 116  | 110  | 114  | 113  | <b>0.87</b> |
| <b>CARD9</b>    | 42   | 26   | 50   | 39   | 51   | 51   | 34   | 45   | <b>0.87</b> |
| <b>BTK</b>      | 88   | 74   | 87   | 83   | 102  | 92   | 93   | 96   | <b>0.87</b> |
| <b>C8B</b>      | 5    | 3    | 5    | 4    | 5    | 5    | 5    | 5    | <b>0.87</b> |
| <b>RUNX1</b>    | 313  | 284  | 285  | 294  | 352  | 361  | 306  | 340  | <b>0.87</b> |
| <b>FCGR2C</b>   | 405  | 345  | 396  | 382  | 426  | 476  | 426  | 443  | <b>0.86</b> |
| <b>ETS1</b>     | 6514 | 5569 | 5864 | 5982 | 7355 | 6742 | 6707 | 6935 | <b>0.86</b> |
| <b>STAT1</b>    | 375  | 374  | 353  | 367  | 450  | 434  | 397  | 427  | <b>0.86</b> |
| <b>SOCS1</b>    | 170  | 139  | 148  | 152  | 175  | 193  | 164  | 177  | <b>0.86</b> |
| <b>BST2</b>     | 280  | 255  | 222  | 252  | 290  | 289  | 304  | 294  | <b>0.86</b> |
| <b>FCGR3B</b>   | 3    | 3    | 6    | 4    | 2    | 10   | 2    | 5    | <b>0.86</b> |
| <b>ICAM5</b>    | 5    | 3    | 4    | 4    | 4    | 4    | 6    | 5    | <b>0.86</b> |
| <b>NOTCH2</b>   | 460  | 373  | 396  | 410  | 478  | 485  | 471  | 478  | <b>0.86</b> |
| <b>FCGR3A</b>   | 202  | 207  | 166  | 192  | 225  | 240  | 207  | 224  | <b>0.86</b> |
| <b>UBE2L3</b>   | 463  | 400  | 369  | 411  | 523  | 452  | 469  | 481  | <b>0.85</b> |
| <b>TBP</b>      | 41   | 47   | 39   | 42   | 53   | 52   | 44   | 50   | <b>0.85</b> |
| <b>MARCO</b>    | 14   | 22   | 10   | 15   | 20   | 21   | 13   | 18   | <b>0.85</b> |
| <b>ITGAM</b>    | 254  | 195  | 206  | 218  | 271  | 263  | 235  | 256  | <b>0.85</b> |
| <b>TP53</b>     | 201  | 159  | 173  | 178  | 206  | 213  | 207  | 209  | <b>0.85</b> |
| <b>MX1</b>      | 321  | 274  | 310  | 302  | 364  | 352  | 349  | 355  | <b>0.85</b> |
| <b>PSMB10</b>   | 760  | 651  | 653  | 688  | 889  | 780  | 760  | 810  | <b>0.85</b> |



|           |      |      |      |      |      |      |      |      |      |
|-----------|------|------|------|------|------|------|------|------|------|
| CD28      | 1551 | 1413 | 1492 | 1485 | 1789 | 1727 | 1743 | 1753 | 0.85 |
| IL8       | 4444 | 3897 | 3630 | 3990 | 4904 | 4777 | 4448 | 4710 | 0.85 |
| HLA-DQA1  | 247  | 260  | 229  | 245  | 295  | 288  | 286  | 290  | 0.85 |
| CD247     | 1807 | 1578 | 1576 | 1654 | 2096 | 1907 | 1860 | 1954 | 0.85 |
| CD3EAP    | 12   | 5    | 5    | 7    | 8    | 9    | 9    | 9    | 0.85 |
| CYBB      | 637  | 578  | 655  | 623  | 637  | 821  | 757  | 738  | 0.84 |
| LCK       | 1307 | 1137 | 1096 | 1180 | 1533 | 1377 | 1287 | 1399 | 0.84 |
| ZEB1      | 395  | 323  | 361  | 360  | 447  | 438  | 395  | 427  | 0.84 |
| NFIL3     | 111  | 108  | 84   | 101  | 115  | 142  | 103  | 120  | 0.84 |
| TRAF2     | 69   | 63   | 85   | 72   | 91   | 89   | 78   | 86   | 0.84 |
| NFATC1    | 176  | 175  | 160  | 170  | 234  | 192  | 182  | 203  | 0.84 |
| IL2       | 6    | 10   | 5    | 7    | 7    | 11   | 7    | 8    | 0.84 |
| CASP2     | 230  | 190  | 204  | 208  | 241  | 242  | 260  | 248  | 0.84 |
| TNFSF8    | 47   | 35   | 64   | 49   | 62   | 59   | 53   | 58   | 0.84 |
| ICOS      | 571  | 473  | 526  | 523  | 658  | 616  | 602  | 625  | 0.84 |
| CCR2      | 2    | 7    | 6    | 5    | 4    | 8    | 6    | 6    | 0.83 |
| SELE      | 5    | 4    | 6    | 5    | 3    | 10   | 5    | 6    | 0.83 |
| TNFSF10   | 13   | 17   | 10   | 13   | 19   | 19   | 10   | 16   | 0.83 |
| XCL1      | 4    | 3    | 3    | 3    | 4    | 4    | 4    | 4    | 0.83 |
| MAP4K4    | 519  | 417  | 463  | 466  | 616  | 543  | 521  | 560  | 0.83 |
| TLR9      | 21   | 22   | 26   | 23   | 23   | 36   | 24   | 28   | 0.83 |
| CCL4      | 41   | 42   | 50   | 44   | 56   | 52   | 52   | 53   | 0.83 |
| IKBKAP    | 31   | 45   | 32   | 36   | 36   | 40   | 54   | 43   | 0.83 |
| IRF5      | 22   | 12   | 20   | 18   | 25   | 24   | 16   | 22   | 0.83 |
| IRGM      | 19   | 19   | 16   | 18   | 22   | 23   | 20   | 22   | 0.83 |
| MASP2     | 13   | 12   | 19   | 15   | 13   | 23   | 17   | 18   | 0.83 |
| ITGA5     | 454  | 422  | 494  | 457  | 576  | 551  | 536  | 554  | 0.82 |
| C9        | 3    | 8    | 3    | 5    | 7    | 7    | 3    | 6    | 0.82 |
| IL7       | 4    | 4    | 6    | 5    | 4    | 5    | 8    | 6    | 0.82 |
| SERPING1  | 10   | 14   | 4    | 9    | 11   | 11   | 12   | 11   | 0.82 |
| HLA-DRA   | 2912 | 2565 | 2894 | 2790 | 3460 | 3393 | 3365 | 3406 | 0.82 |
| IL18      | 14   | 21   | 28   | 21   | 29   | 28   | 20   | 26   | 0.82 |
| FCGR2A    | 91   | 85   | 92   | 89   | 103  | 117  | 109  | 110  | 0.81 |
| LILRA5    | 13   | 14   | 21   | 16   | 18   | 24   | 17   | 20   | 0.81 |
| IL1R2     | 19   | 19   | 14   | 17   | 25   | 21   | 18   | 21   | 0.81 |
| PLA2G2A   | 4    | 6    | 3    | 4    | 7    | 6    | 3    | 5    | 0.81 |
| LAIR1     | 116  | 126  | 119  | 120  | 158  | 159  | 129  | 149  | 0.81 |
| C1R       | 31   | 34   | 45   | 37   | 42   | 39   | 55   | 45   | 0.81 |
| IKZF3     | 245  | 211  | 225  | 227  | 277  | 278  | 288  | 281  | 0.81 |
| CD86      | 101  | 75   | 96   | 91   | 120  | 101  | 116  | 112  | 0.81 |
| TNFRSF10C | 16   | 8    | 5    | 10   | 15   | 12   | 9    | 12   | 0.81 |
| XCR1      | 5    | 14   | 10   | 10   | 8    | 18   | 10   | 12   | 0.81 |
| MR1       | 50   | 34   | 35   | 40   | 48   | 58   | 42   | 49   | 0.80 |
| C5        | 15   | 10   | 16   | 14   | 19   | 14   | 18   | 17   | 0.80 |

|                 |      |      |      |      |      |      |      |      |             |
|-----------------|------|------|------|------|------|------|------|------|-------------|
| <b>HLA-DMB</b>  | 193  | 163  | 191  | 182  | 227  | 237  | 217  | 227  | <b>0.80</b> |
| <b>FCGR7</b>    | 355  | 306  | 245  | 302  | 349  | 449  | 334  | 377  | <b>0.80</b> |
| <b>CUL9</b>     | 320  | 274  | 306  | 300  | 404  | 361  | 362  | 376  | <b>0.80</b> |
| <b>PLAUR</b>    | 542  | 492  | 459  | 498  | 675  | 624  | 579  | 626  | <b>0.79</b> |
| <b>LILRA6</b>   | 35   | 36   | 29   | 33   | 49   | 46   | 31   | 42   | <b>0.79</b> |
| <b>IRF3</b>     | 778  | 675  | 780  | 744  | 973  | 987  | 854  | 938  | <b>0.79</b> |
| <b>G6PD</b>     | 156  | 137  | 131  | 141  | 189  | 177  | 171  | 179  | <b>0.79</b> |
| <b>CXCR2</b>    | 25   | 16   | 19   | 20   | 25   | 27   | 24   | 25   | <b>0.79</b> |
| <b>SYK</b>      | 124  | 101  | 87   | 104  | 131  | 137  | 128  | 132  | <b>0.79</b> |
| <b>CASP3</b>    | 77   | 59   | 38   | 58   | 74   | 81   | 66   | 74   | <b>0.79</b> |
| <b>IRAK3</b>    | 59   | 62   | 62   | 61   | 84   | 68   | 81   | 78   | <b>0.79</b> |
| <b>IRF4</b>     | 68   | 85   | 66   | 73   | 102  | 95   | 82   | 93   | <b>0.78</b> |
| <b>IKBKE</b>    | 205  | 167  | 174  | 182  | 220  | 229  | 248  | 232  | <b>0.78</b> |
| <b>C4B</b>      | 17   | 14   | 12   | 14   | 19   | 29   | 7    | 18   | <b>0.78</b> |
| <b>PTPN6</b>    | 399  | 361  | 397  | 386  | 530  | 469  | 487  | 495  | <b>0.78</b> |
| <b>PML</b>      | 63   | 51   | 58   | 57   | 68   | 81   | 72   | 74   | <b>0.78</b> |
| <b>CCL16</b>    | 1    | 5    | 8    | 5    | 7    | 7    | 4    | 6    | <b>0.78</b> |
| <b>LILRA4</b>   | 3    | 3    | 8    | 5    | 4    | 7    | 7    | 6    | <b>0.78</b> |
| <b>LILRA2</b>   | 83   | 74   | 90   | 82   | 109  | 102  | 107  | 106  | <b>0.78</b> |
| <b>LCP2</b>     | 1465 | 1228 | 1195 | 1296 | 1767 | 1690 | 1561 | 1673 | <b>0.77</b> |
| <b>ICAM4</b>    | 12   | 12   | 10   | 11   | 17   | 21   | 6    | 15   | <b>0.77</b> |
| <b>HLA-DRB3</b> | 1036 | 903  | 876  | 938  | 1349 | 1165 | 1130 | 1215 | <b>0.77</b> |
| <b>TGFBI</b>    | 400  | 341  | 390  | 377  | 527  | 470  | 470  | 489  | <b>0.77</b> |
| <b>IL21R</b>    | 105  | 91   | 91   | 96   | 128  | 130  | 115  | 124  | <b>0.77</b> |
| <b>CCL18</b>    | 5    | 2    | 3    | 3    | 2    | 3    | 8    | 4    | <b>0.77</b> |
| <b>CD244</b>    | 55   | 51   | 44   | 50   | 68   | 65   | 62   | 65   | <b>0.77</b> |
| <b>TLR4</b>     | 45   | 40   | 26   | 37   | 53   | 49   | 43   | 48   | <b>0.77</b> |
| <b>ITGAX</b>    | 250  | 228  | 230  | 236  | 314  | 317  | 294  | 308  | <b>0.77</b> |
| <b>JAK3</b>     | 676  | 616  | 697  | 663  | 922  | 827  | 851  | 867  | <b>0.77</b> |
| <b>HLA-DRB1</b> | 2763 | 2380 | 2360 | 2501 | 3494 | 3176 | 3150 | 3273 | <b>0.76</b> |
| <b>IL20</b>     | 6    | 13   | 10   | 10   | 8    | 17   | 13   | 13   | <b>0.76</b> |
| <b>LTF</b>      | 8    | 10   | 11   | 10   | 11   | 17   | 10   | 13   | <b>0.76</b> |
| <b>CXCL2</b>    | 97   | 77   | 105  | 93   | 118  | 137  | 114  | 123  | <b>0.76</b> |
| <b>CD36</b>     | 269  | 209  | 236  | 238  | 326  | 320  | 302  | 316  | <b>0.75</b> |
| <b>CLEC4A</b>   | 67   | 71   | 77   | 72   | 94   | 106  | 86   | 95   | <b>0.75</b> |
| <b>TRAF1</b>    | 598  | 517  | 490  | 535  | 725  | 747  | 667  | 713  | <b>0.75</b> |
| <b>C4A</b>      | 18   | 22   | 11   | 17   | 27   | 20   | 21   | 23   | <b>0.75</b> |
| <b>CCL13</b>    | 5    | 3    | 4    | 4    | 4    | 9    | 3    | 5    | <b>0.75</b> |
| <b>CFB</b>      | 6    | 11   | 10   | 9    | 8    | 19   | 9    | 12   | <b>0.75</b> |
| <b>IL4</b>      | 9    | 7    | 8    | 8    | 11   | 13   | 8    | 11   | <b>0.75</b> |
| <b>KIR2DS4</b>  | 10   | 25   | 16   | 17   | 17   | 28   | 23   | 23   | <b>0.75</b> |
| <b>MME</b>      | 13   | 6    | 11   | 10   | 13   | 10   | 17   | 13   | <b>0.75</b> |
| <b>IL13RA1</b>  | 69   | 108  | 71   | 83   | 127  | 106  | 99   | 111  | <b>0.75</b> |
| <b>IFNAR2</b>   | 478  | 389  | 431  | 433  | 608  | 557  | 573  | 579  | <b>0.75</b> |

|                |      |      |      |      |      |      |      |      |             |
|----------------|------|------|------|------|------|------|------|------|-------------|
| <b>CSF3R</b>   | 304  | 241  | 203  | 249  | 371  | 312  | 320  | 334  | <b>0.75</b> |
| <b>IL1RN</b>   | 65   | 53   | 58   | 59   | 82   | 85   | 69   | 79   | <b>0.75</b> |
| <b>FCER1G</b>  | 983  | 825  | 878  | 895  | 1314 | 1134 | 1157 | 1202 | <b>0.75</b> |
| <b>TIGIT</b>   | 79   | 59   | 80   | 73   | 88   | 121  | 86   | 98   | <b>0.74</b> |
| <b>CSF2RB</b>  | 190  | 159  | 163  | 171  | 234  | 264  | 195  | 231  | <b>0.74</b> |
| <b>BST1</b>    | 125  | 119  | 90   | 111  | 161  | 141  | 151  | 151  | <b>0.74</b> |
| <b>CD14</b>    | 721  | 626  | 647  | 665  | 936  | 876  | 899  | 904  | <b>0.74</b> |
| <b>IL28A</b>   | 3    | 4    | 4    | 4    | 4    | 8    | 3    | 5    | <b>0.73</b> |
| <b>KIR2DS1</b> | 3    | 5    | 3    | 4    | 5    | 2    | 8    | 5    | <b>0.73</b> |
| <b>IFNAR1</b>  | 57   | 52   | 47   | 52   | 66   | 80   | 67   | 71   | <b>0.73</b> |
| <b>CCL3</b>    | 116  | 102  | 123  | 114  | 148  | 161  | 157  | 155  | <b>0.73</b> |
| <b>IL16</b>    | 586  | 516  | 443  | 515  | 762  | 720  | 637  | 706  | <b>0.73</b> |
| <b>FKBP5</b>   | 339  | 299  | 325  | 321  | 463  | 431  | 428  | 441  | <b>0.73</b> |
| <b>NFKBIZ</b>  | 1549 | 1321 | 1375 | 1415 | 1999 | 1930 | 1925 | 1951 | <b>0.73</b> |
| <b>PTGS2</b>   | 54   | 53   | 51   | 53   | 71   | 83   | 64   | 73   | <b>0.72</b> |
| <b>CRADD</b>   | 59   | 58   | 47   | 55   | 82   | 76   | 69   | 76   | <b>0.72</b> |
| <b>CD7</b>     | 734  | 678  | 696  | 703  | 1046 | 937  | 935  | 973  | <b>0.72</b> |
| <b>HLA-DOB</b> | 52   | 48   | 54   | 51   | 76   | 70   | 68   | 71   | <b>0.72</b> |
| <b>CD1D</b>    | 44   | 47   | 44   | 45   | 68   | 61   | 59   | 63   | <b>0.72</b> |
| <b>CD8B</b>    | 16   | 21   | 13   | 17   | 27   | 28   | 15   | 23   | <b>0.71</b> |
| <b>CCL22</b>   | 7    | 8    | 5    | 7    | 7    | 16   | 5    | 9    | <b>0.71</b> |
| <b>IL6R</b>    | 189  | 156  | 139  | 161  | 237  | 237  | 204  | 226  | <b>0.71</b> |
| <b>TAL1</b>    | 14   | 8    | 15   | 12   | 13   | 29   | 10   | 17   | <b>0.71</b> |
| <b>LILRB3</b>  | 56   | 57   | 53   | 55   | 84   | 76   | 74   | 78   | <b>0.71</b> |
| <b>IL1B</b>    | 264  | 238  | 245  | 249  | 342  | 362  | 352  | 352  | <b>0.71</b> |
| <b>CD27</b>    | 455  | 401  | 400  | 419  | 607  | 600  | 580  | 596  | <b>0.70</b> |
| <b>IL12B</b>   | 2    | 2    | 3    | 2    | 5    | 4    | 1    | 3    | <b>0.70</b> |
| <b>TLR5</b>    | 18   | 15   | 9    | 14   | 17   | 21   | 22   | 20   | <b>0.70</b> |
| <b>FCAR</b>    | 55   | 46   | 40   | 47   | 65   | 78   | 59   | 67   | <b>0.70</b> |
| <b>CFI</b>     | 6    | 8    | 2    | 5    | 5    | 10   | 8    | 8    | <b>0.70</b> |
| <b>CXCL1</b>   | 127  | 112  | 108  | 116  | 139  | 178  | 183  | 167  | <b>0.69</b> |
| <b>LILRB2</b>  | 45   | 49   | 53   | 49   | 71   | 70   | 71   | 71   | <b>0.69</b> |
| <b>CCL7</b>    | 1    | 5    | 3    | 3    | 3    | 5    | 5    | 4    | <b>0.69</b> |
| <b>CX3CR1</b>  | 35   | 19   | 38   | 31   | 40   | 49   | 44   | 44   | <b>0.69</b> |
| <b>CAMP</b>    | 5    | 8    | 9    | 7    | 6    | 12   | 14   | 11   | <b>0.69</b> |
| <b>ITLN2</b>   | 2    | 5    | 4    | 4    | 4    | 7    | 5    | 5    | <b>0.69</b> |
| <b>PPARG</b>   | 4    | 3    | 4    | 4    | 4    | 6    | 6    | 5    | <b>0.69</b> |
| <b>TGFBR2</b>  | 690  | 602  | 489  | 594  | 961  | 909  | 727  | 866  | <b>0.69</b> |
| <b>LILRA1</b>  | 31   | 30   | 26   | 29   | 37   | 45   | 46   | 43   | <b>0.68</b> |
| <b>ITGA6</b>   | 725  | 634  | 726  | 695  | 1067 | 1008 | 1006 | 1027 | <b>0.68</b> |
| <b>LILRA3</b>  | 124  | 97   | 108  | 110  | 157  | 176  | 154  | 162  | <b>0.68</b> |
| <b>CLEC4E</b>  | 57   | 40   | 38   | 45   | 78   | 62   | 61   | 67   | <b>0.67</b> |
| <b>TCF7</b>    | 5154 | 4642 | 4659 | 4818 | 7726 | 6916 | 6924 | 7189 | <b>0.67</b> |
| <b>BATF3</b>   | 2    | 4    | 4    | 3    | 3    | 8    | 4    | 5    | <b>0.67</b> |

|                 |      |      |      |      |      |      |      |      |             |
|-----------------|------|------|------|------|------|------|------|------|-------------|
| <b>C8A</b>      | 5    | 3    | 2    | 3    | 4    | 7    | 4    | 5    | <b>0.67</b> |
| <b>CFD</b>      | 58   | 60   | 46   | 55   | 90   | 77   | 79   | 82   | <b>0.67</b> |
| <b>CFP</b>      | 30   | 25   | 26   | 27   | 36   | 47   | 39   | 41   | <b>0.66</b> |
| <b>APP</b>      | 326  | 309  | 271  | 302  | 484  | 434  | 469  | 462  | <b>0.65</b> |
| <b>CXCR1</b>    | 6    | 3    | 4    | 4    | 5    | 8    | 7    | 7    | <b>0.65</b> |
| <b>KIR2DS3</b>  | 2    | 6    | 5    | 4    | 4    | 8    | 8    | 7    | <b>0.65</b> |
| <b>FCER1A</b>   | 222  | 207  | 197  | 209  | 334  | 304  | 333  | 324  | <b>0.64</b> |
| <b>CX3CL1</b>   | 2    | 4    | 3    | 3    | 5    | 5    | 4    | 5    | <b>0.64</b> |
| <b>CCL19</b>    | 6    | 6    | 2    | 5    | 5    | 11   | 6    | 7    | <b>0.64</b> |
| <b>ENTPD1</b>   | 6    | 14   | 15   | 12   | 16   | 22   | 17   | 18   | <b>0.64</b> |
| <b>NOTCH1</b>   | 147  | 145  | 115  | 136  | 216  | 216  | 208  | 213  | <b>0.64</b> |
| <b>CASP10</b>   | 8    | 6    | 10   | 8    | 11   | 18   | 9    | 13   | <b>0.63</b> |
| <b>TNFSF11</b>  | 6    | 12   | 6    | 8    | 8    | 20   | 10   | 13   | <b>0.63</b> |
| <b>CCBP2</b>    | 3    | 5    | 9    | 6    | 9    | 10   | 8    | 9    | <b>0.63</b> |
| <b>LTBR</b>     | 76   | 60   | 70   | 69   | 110  | 98   | 121  | 110  | <b>0.63</b> |
| <b>IL1RL1</b>   | 4    | 5    | 1    | 3    | 4    | 8    | 4    | 5    | <b>0.63</b> |
| <b>KLRC1</b>    | 3    | 9    | 4    | 5    | 7    | 10   | 9    | 9    | <b>0.62</b> |
| <b>CD1A</b>     | 5    | 4    | 2    | 4    | 4    | 8    | 6    | 6    | <b>0.61</b> |
| <b>FN1</b>      | 3    | 3    | 5    | 4    | 3    | 11   | 4    | 6    | <b>0.61</b> |
| <b>IL19</b>     | 4    | 3    | 4    | 4    | 6    | 10   | 2    | 6    | <b>0.61</b> |
| <b>RAG1</b>     | 6    | 3    | 2    | 4    | 3    | 7    | 8    | 6    | <b>0.61</b> |
| <b>SELL</b>     | 1114 | 919  | 1027 | 1020 | 1801 | 1709 | 1594 | 1701 | <b>0.60</b> |
| <b>TNFRSF17</b> | 4    | 5    | 4    | 4    | 7    | 7    | 8    | 7    | <b>0.59</b> |
| <b>C2</b>       | 5    | 10   | 15   | 10   | 14   | 27   | 10   | 17   | <b>0.59</b> |
| <b>CEACAM6</b>  | 4    | 2    | 4    | 3    | 4    | 10   | 3    | 6    | <b>0.59</b> |
| <b>CD55</b>     | 15   | 19   | 27   | 20   | 29   | 39   | 36   | 35   | <b>0.59</b> |
| <b>PTAFR</b>    | 30   | 27   | 17   | 25   | 43   | 50   | 35   | 43   | <b>0.58</b> |
| <b>PLAU</b>     | 6    | 4    | 8    | 6    | 10   | 10   | 12   | 11   | <b>0.56</b> |
| <b>VTN</b>      | 2    | 4    | 8    | 5    | 4    | 10   | 11   | 8    | <b>0.56</b> |
| <b>IL6ST</b>    | 1628 | 1596 | 1654 | 1626 | 2957 | 2932 | 2828 | 2906 | <b>0.56</b> |
| <b>FAS</b>      | 16   | 11   | 11   | 13   | 25   | 21   | 22   | 23   | <b>0.56</b> |
| <b>LEF1</b>     | 1601 | 1400 | 1283 | 1428 | 2791 | 2539 | 2411 | 2580 | <b>0.55</b> |
| <b>HAMP</b>     | 6    | 3    | 2    | 4    | 8    | 7    | 5    | 7    | <b>0.55</b> |
| <b>TLR8</b>     | 23   | 16   | 18   | 19   | 28   | 40   | 36   | 35   | <b>0.55</b> |
| <b>C1QB</b>     | 5    | 3    | 4    | 4    | 4    | 8    | 10   | 7    | <b>0.55</b> |
| <b>IL1RL2</b>   | 3    | 3    | 6    | 4    | 4    | 10   | 8    | 7    | <b>0.55</b> |
| <b>FADD</b>     | 21   | 21   | 17   | 20   | 43   | 40   | 27   | 37   | <b>0.54</b> |
| <b>IL13</b>     | 6    | 8    | 2    | 5    | 11   | 15   | 4    | 10   | <b>0.53</b> |
| <b>PTK2</b>     | 79   | 64   | 71   | 71   | 140  | 129  | 134  | 134  | <b>0.53</b> |
| <b>ATM</b>      | 29   | 24   | 29   | 27   | 56   | 60   | 47   | 54   | <b>0.50</b> |
| <b>IL17F</b>    | 4    | 3    | 1    | 3    | 8    | 6    | 2    | 5    | <b>0.50</b> |
| <b>IL1A</b>     | 4    | 7    | 3    | 5    | 8    | 10   | 10   | 9    | <b>0.50</b> |
| <b>IL22RA2</b>  | 1    | 1    | 1    | 1    | 2    | 1    | 3    | 2    | <b>0.50</b> |
| <b>MBL2</b>     | 2    | 3    | 2    | 2    | 3    | 7    | 4    | 5    | <b>0.50</b> |

|              |     |     |     |     |     |     |     |     |             |
|--------------|-----|-----|-----|-----|-----|-----|-----|-----|-------------|
| <b>CCR7</b>  | 320 | 276 | 286 | 294 | 635 | 587 | 618 | 613 | <b>0.48</b> |
| <b>CSF1R</b> | 19  | 18  | 21  | 19  | 42  | 45  | 36  | 41  | <b>0.47</b> |
| <b>CCL23</b> | 2   | 3   | 3   | 3   | 2   | 10  | 6   | 6   | <b>0.44</b> |
| <b>IL27</b>  | 2   | 4   | 1   | 2   | 5   | 4   | 7   | 5   | <b>0.44</b> |
| <b>IFNA2</b> | 1   | 1   | 1   | 1   | 1   | 3   | 3   | 2   | <b>0.43</b> |
| <b>VCAM1</b> | 2   | 3   | 3   | 3   | 7   | 5   | 7   | 6   | <b>0.42</b> |
| <b>IL17B</b> | 2   | 1   | 2   | 2   | 3   | 8   | 1   | 4   | <b>0.42</b> |
| <b>EBI3</b>  | 3   | 5   | 4   | 4   | 7   | 15  | 7   | 10  | <b>0.41</b> |
| <b>C6</b>    | 1   | 5   | 2   | 3   | 5   | 8   | 10  | 8   | <b>0.35</b> |

**Supplemental Table 5. Th17 Stemness transcripts in the CD4+CD146+CCR5+ T cells.**

| <b>Gene</b>   | <b>C146+CCR5+<br/>Tcons vs. T<br/>cells excluding<br/>CD146+CCR5+</b> |
|---------------|-----------------------------------------------------------------------|
| <i>BCL2</i>   | 1.06                                                                  |
| <i>TCF4</i>   | 0.94                                                                  |
| <i>CTNNB1</i> | 0.88                                                                  |
| <i>TCF7</i>   | 0.67                                                                  |
| <i>NOTCH1</i> | 0.64                                                                  |
| <i>LEF1</i>   | 0.55                                                                  |
| <i>TCF4</i>   | 0.94                                                                  |
| <i>CTNNB1</i> | 0.88                                                                  |
| <i>NOTCH2</i> | 0.86                                                                  |

**Supplemental Table 6. CD146 on T cells and vessels in GI biopsies of GI-GVHD and non-GVHD enteritis post-HCT.**

| <b>Patient</b> | <b>GVHD status</b> | <b>CD3 T cells</b> | <b>CD146 T cells</b> | <b>CD146 vessel count, 10X</b> |
|----------------|--------------------|--------------------|----------------------|--------------------------------|
| Patient 1      | GVHD               | 220                | 0                    | 0                              |
| Patient 2      | GVHD               | 67                 | 3                    | 32                             |
| Patient 3      | GVHD               | 97                 | 0                    | 6                              |
| Patient 4      | GVHD               | 58                 | 0                    | 105                            |
| Patient 5      | GVHD               | 55                 | 3.3                  | 8                              |
| Patient 6      | GVHD               | 90                 | 1                    | 82                             |
| Patient 7      | GVHD               | 48                 | 0                    | 14                             |
| Patient 8      | GVHD               | 42                 | 2                    | 9                              |
| Patient 9      | GVHD               | 137                | 2                    | 9                              |
| Patient 10     | GVHD               | 97                 | 4                    | 24                             |
| Patient 11     | GVHD               | 156                | 3.3                  | 229                            |
| Patient 12     | GVHD               | 86                 | 2.7                  | 56                             |
| Patient 13     | GVHD               | 43                 | 0                    | 46                             |
| Patient 14     | GVHD               | 364                | 4.7                  | 86                             |
| Patient 15     | GVHD               | 157                | 3.3                  | 82                             |
| Patient 16     | GVHD               | 100                | 3                    | 82                             |
| Patient 17     | GVHD               | 68                 | 7.7                  | 36                             |
| Patient 18     | GVHD               | 34                 | 3                    | 13                             |
| Patient 19     | Non-GVHD           | 182                | 1                    | 21                             |
| Patient 20     | Non-GVHD           | 19                 | 1.3                  | 13                             |
| Patient 21     | Non-GVHD           | 45                 | 5.3                  | 3                              |
| Patient 22     | Non-GVHD           | 31                 | 0                    | 7                              |
| Patient 23     | Non-GVHD           | 115                | 0                    | 0                              |
| Patient 24     | Non-GVHD           | 68                 | 0                    | 0                              |
| Patient 25     | Non-GVHD           | 155                | 3                    | 30                             |
| Patient 26     | Non-GVHD           | 86                 | 8.3                  | 23                             |
| Patient 27     | Non-GVHD           | 50                 | 0                    | 13                             |
| Patient 28     | Non-GVHD           | 55                 | 1                    | 14                             |

**Supplemental Table 7. Transcriptome analysis of sorted human CD146+CCR5+ Tregs and T-cell population excluding CD146+CCR5+ Tregs.**

| <b>Gene</b>     | <b>Tregs double positive for CD146 CCR5</b> | <b>Tregs double positive for CD146 CCR5</b> | <b>Tregs double positive for CD146 CCR5</b> | <b>Average Tregs double positive for CD146 CCR5</b> | <b>Tregs negative for CD146 CCR5</b> | <b>Tregs negative for CD146 CCR5</b> | <b>Tregs negative for CD146 CCR5</b> | <b>Average Tregs negative for CD146 CCR5</b> | <b>Fold difference in Tregs positive for CD146CCR5 vs. those negative for CD146CCR5</b> |
|-----------------|---------------------------------------------|---------------------------------------------|---------------------------------------------|-----------------------------------------------------|--------------------------------------|--------------------------------------|--------------------------------------|----------------------------------------------|-----------------------------------------------------------------------------------------|
| <b>KIR3DL3</b>  | 15                                          | 9                                           | 16                                          | 13                                                  | 3                                    | 3                                    | 1                                    | 2                                            | <b>12.36</b>                                                                            |
| <b>CCL22</b>    | 24                                          | 50                                          | 56                                          | 43                                                  | 13                                   | 17                                   | 4                                    | 12                                           | <b>9.98</b>                                                                             |
| <b>CX3CL1</b>   | 15                                          | 14                                          | 28                                          | 19                                                  | 10                                   | 4                                    | 2                                    | 5                                            | <b>8.73</b>                                                                             |
| <b>CCL15</b>    | 12                                          | 32                                          | 48                                          | 31                                                  | 9                                    | 12                                   | 4                                    | 8                                            | <b>7.05</b>                                                                             |
| <b>CXCL13</b>   | 18                                          | 18                                          | 32                                          | 23                                                  | 5                                    | 7                                    | 3                                    | 5                                            | <b>6.98</b>                                                                             |
| <b>PDGFB</b>    | 3                                           | 14                                          | 4                                           | 7                                                   | 4                                    | 7                                    | 1                                    | 4                                            | <b>6.35</b>                                                                             |
| <b>CCR2</b>     | 9                                           | 14                                          | 16                                          | 13                                                  | 4                                    | 5                                    | 2                                    | 4                                            | <b>5.95</b>                                                                             |
| <b>KIR2DS1</b>  | 3                                           | 27                                          | 8                                           | 13                                                  | 4                                    | 9                                    | 2                                    | 5                                            | <b>5.88</b>                                                                             |
| <b>PLA2G2E</b>  | 24                                          | 18                                          | 52                                          | 31                                                  | 8                                    | 12                                   | 5                                    | 8                                            | <b>5.79</b>                                                                             |
| <b>CCR5</b>     | 48                                          | 59                                          | 80                                          | 62                                                  | 9                                    | 16                                   | 11                                   | 12                                           | <b>5.75</b>                                                                             |
| <b>DEFB103B</b> | 18                                          | 36                                          | 20                                          | 25                                                  | 8                                    | 9                                    | 4                                    | 7                                            | <b>5.71</b>                                                                             |
| <b>CEACAM1</b>  | 51                                          | 68                                          | 60                                          | 60                                                  | 21                                   | 13                                   | 11                                   | 15                                           | <b>5.51</b>                                                                             |
| <b>CD80</b>     | 33                                          | 45                                          | 44                                          | 41                                                  | 12                                   | 13                                   | 8                                    | 11                                           | <b>5.37</b>                                                                             |
| <b>IFNB1</b>    | 9                                           | 14                                          | 12                                          | 12                                                  | 7                                    | 8                                    | 2                                    | 6                                            | <b>5.33</b>                                                                             |
| <b>FCGR3B</b>   | 12                                          | 27                                          | 44                                          | 28                                                  | 9                                    | 5                                    | 5                                    | 6                                            | <b>5.12</b>                                                                             |
| <b>MBL2</b>     | 3                                           | 23                                          | 24                                          | 17                                                  | 3                                    | 7                                    | 3                                    | 5                                            | <b>5.08</b>                                                                             |
| <b>CD34</b>     | 15                                          | 23                                          | 28                                          | 22                                                  | 3                                    | 4                                    | 4                                    | 4                                            | <b>5.05</b>                                                                             |
| <b>XCR1</b>     | 24                                          | 54                                          | 36                                          | 38                                                  | 15                                   | 8                                    | 8                                    | 10                                           | <b>5.02</b>                                                                             |
| <b>IL19</b>     | 3                                           | 18                                          | 44                                          | 22                                                  | 12                                   | 11                                   | 4                                    | 9                                            | <b>5.00</b>                                                                             |
| <b>IL26</b>     | 90                                          | 154                                         | 144                                         | 129                                                 | 38                                   | 31                                   | 26                                   | 32                                           | <b>4.98</b>                                                                             |
| <b>TNFRSF9</b>  | 24                                          | 95                                          | 56                                          | 58                                                  | 15                                   | 17                                   | 12                                   | 15                                           | <b>4.89</b>                                                                             |
| <b>TNFSF11</b>  | 27                                          | 27                                          | 40                                          | 31                                                  | 12                                   | 19                                   | 6                                    | 13                                           | <b>4.83</b>                                                                             |
| <b>IL28B</b>    | 6                                           | 32                                          | 8                                           | 15                                                  | 4                                    | 10                                   | 3                                    | 6                                            | <b>4.68</b>                                                                             |
| <b>CEACAM6</b>  | 9                                           | 27                                          | 8                                           | 15                                                  | 7                                    | 7                                    | 3                                    | 6                                            | <b>4.53</b>                                                                             |
| <b>FN1</b>      | 6                                           | 18                                          | 20                                          | 15                                                  | 7                                    | 3                                    | 3                                    | 4                                            | <b>4.52</b>                                                                             |
| <b>ITLN2</b>    | 6                                           | 9                                           | 28                                          | 14                                                  | 7                                    | 6                                    | 3                                    | 5                                            | <b>4.41</b>                                                                             |
| <b>KIT</b>      | 21                                          | 45                                          | 48                                          | 38                                                  | 16                                   | 8                                    | 9                                    | 11                                           | <b>4.39</b>                                                                             |
| <b>CCL13</b>    | 18                                          | 18                                          | 20                                          | 19                                                  | 8                                    | 5                                    | 4                                    | 6                                            | <b>4.32</b>                                                                             |
| <b>IL27</b>     | 18                                          | 14                                          | 24                                          | 19                                                  | 5                                    | 6                                    | 4                                    | 5                                            | <b>4.28</b>                                                                             |
| <b>CD3EAP</b>   | 12                                          | 27                                          | 16                                          | 18                                                  | 10                                   | 7                                    | 4                                    | 7                                            | <b>4.24</b>                                                                             |
| <b>ITLN1</b>    | 9                                           | 18                                          | 28                                          | 18                                                  | 10                                   | 3                                    | 4                                    | 6                                            | <b>4.24</b>                                                                             |
| <b>IL9</b>      | 24                                          | 36                                          | 36                                          | 32                                                  | 15                                   | 12                                   | 8                                    | 12                                           | <b>4.23</b>                                                                             |
| <b>TNFAIP6</b>  | 24                                          | 45                                          | 68                                          | 46                                                  | 21                                   | 16                                   | 11                                   | 16                                           | <b>4.22</b>                                                                             |
| <b>C9</b>       | 15                                          | 27                                          | 40                                          | 27                                                  | 5                                    | 11                                   | 6                                    | 8                                            | <b>4.21</b>                                                                             |
| <b>XCL1</b>     | 9                                           | 23                                          | 20                                          | 17                                                  | 3                                    | 4                                    | 4                                    | 4                                            | <b>3.97</b>                                                                             |



|                  |    |    |     |    |    |    |    |    |             |
|------------------|----|----|-----|----|----|----|----|----|-------------|
| <b>AIRE</b>      | 48 | 63 | 56  | 56 | 15 | 22 | 14 | 17 | <b>3.96</b> |
| <b>PIGR</b>      | 9  | 14 | 28  | 17 | 4  | 7  | 4  | 5  | <b>3.89</b> |
| <b>C1QB</b>      | 3  | 23 | 24  | 17 | 8  | 8  | 4  | 7  | <b>3.81</b> |
| <b>IL29</b>      | 24 | 5  | 32  | 20 | 3  | 6  | 5  | 5  | <b>3.73</b> |
| <b>DEFB1</b>     | 12 | 36 | 12  | 20 | 8  | 6  | 5  | 6  | <b>3.71</b> |
| <b>LILRB5</b>    | 30 | 45 | 32  | 36 | 13 | 13 | 10 | 12 | <b>3.67</b> |
| <b>CCL16</b>     | 24 | 27 | 32  | 28 | 11 | 11 | 8  | 10 | <b>3.66</b> |
| <b>RAG1</b>      | 18 | 36 | 16  | 23 | 9  | 7  | 6  | 7  | <b>3.61</b> |
| <b>IFNA1</b>     | 3  | 5  | 4   | 4  | 1  | 1  | 1  | 1  | <b>3.56</b> |
| <b>KIR2DL5A</b>  | 24 | 32 | 48  | 35 | 13 | 14 | 10 | 12 | <b>3.55</b> |
| <b>TLR9</b>      | 45 | 63 | 120 | 76 | 22 | 23 | 22 | 22 | <b>3.51</b> |
| <b>CAMP</b>      | 24 | 23 | 56  | 34 | 12 | 11 | 10 | 11 | <b>3.51</b> |
| <b>IL22</b>      | 6  | 5  | 12  | 8  | 4  | 3  | 2  | 3  | <b>3.47</b> |
| <b>C7</b>        | 51 | 90 | 80  | 74 | 21 | 21 | 22 | 21 | <b>3.41</b> |
| <b>ICAM5</b>     | 9  | 9  | 4   | 7  | 8  | 2  | 2  | 4  | <b>3.41</b> |
| <b>CD209</b>     | 9  | 9  | 24  | 14 | 9  | 7  | 4  | 7  | <b>3.23</b> |
| <b>C8B</b>       | 18 | 18 | 16  | 17 | 12 | 8  | 5  | 9  | <b>3.21</b> |
| <b>C2</b>        | 36 | 36 | 32  | 35 | 19 | 14 | 11 | 15 | <b>3.21</b> |
| <b>CFB</b>       | 21 | 18 | 44  | 28 | 14 | 14 | 9  | 12 | <b>3.20</b> |
| <b>VTN</b>       | 27 | 9  | 32  | 23 | 9  | 13 | 8  | 10 | <b>2.99</b> |
| <b>CXCL12</b>    | 3  | 18 | 8   | 10 | 9  | 5  | 3  | 6  | <b>2.98</b> |
| <b>ENTPD1</b>    | 24 | 54 | 56  | 45 | 24 | 21 | 15 | 20 | <b>2.95</b> |
| <b>CCBP2</b>     | 21 | 50 | 44  | 38 | 19 | 14 | 13 | 15 | <b>2.94</b> |
| <b>KIR2DL1</b>   | 3  | 14 | 12  | 10 | 3  | 4  | 3  | 4  | <b>2.93</b> |
| <b>PLAU</b>      | 15 | 5  | 28  | 16 | 11 | 8  | 5  | 8  | <b>2.93</b> |
| <b>KIR2DL2</b>   | 12 | 18 | 36  | 22 | 7  | 10 | 8  | 8  | <b>2.90</b> |
| <b>CXCR6</b>     | 45 | 59 | 28  | 44 | 13 | 12 | 15 | 13 | <b>2.90</b> |
| <b>TLR3</b>      | 39 | 23 | 32  | 31 | 10 | 7  | 11 | 9  | <b>2.89</b> |
| <b>IL23R</b>     | 27 | 54 | 40  | 40 | 30 | 28 | 14 | 24 | <b>2.87</b> |
| <b>TNFRSF13B</b> | 21 | 36 | 36  | 31 | 14 | 14 | 11 | 13 | <b>2.87</b> |
| <b>CFI</b>       | 27 | 27 | 20  | 25 | 11 | 6  | 9  | 9  | <b>2.86</b> |
| <b>IL6</b>       | 3  | 18 | 16  | 12 | 7  | 7  | 4  | 6  | <b>2.85</b> |
| <b>CASP10</b>    | 33 | 59 | 28  | 40 | 20 | 16 | 14 | 17 | <b>2.84</b> |
| <b>LILRA5</b>    | 54 | 59 | 60  | 58 | 21 | 15 | 21 | 19 | <b>2.80</b> |
| <b>CD1A</b>      | 15 | 18 | 12  | 15 | 13 | 5  | 5  | 8  | <b>2.78</b> |
| <b>TNFRSF8</b>   | 18 | 23 | 40  | 27 | 21 | 23 | 10 | 18 | <b>2.76</b> |
| <b>CCRL2</b>     | 24 | 23 | 16  | 21 | 11 | 6  | 8  | 8  | <b>2.76</b> |
| <b>IFNG</b>      | 36 | 50 | 48  | 45 | 21 | 25 | 16 | 21 | <b>2.75</b> |
| <b>CR2</b>       | 24 | 27 | 20  | 24 | 16 | 14 | 9  | 13 | <b>2.74</b> |
| <b>EBI3</b>      | 18 | 14 | 48  | 26 | 15 | 15 | 10 | 13 | <b>2.72</b> |
| <b>SPP1</b>      | 18 | 23 | 12  | 18 | 7  | 4  | 6  | 6  | <b>2.70</b> |
| <b>SELE</b>      | 15 | 14 | 24  | 18 | 11 | 4  | 6  | 7  | <b>2.70</b> |
| <b>AICDA</b>     | 6  | 9  | 20  | 12 | 11 | 8  | 4  | 8  | <b>2.69</b> |
| <b>IL17F</b>     | 18 | 5  | 12  | 12 | 4  | 8  | 4  | 6  | <b>2.66</b> |

|                  |    |     |    |    |    |    |    |    |             |
|------------------|----|-----|----|----|----|----|----|----|-------------|
| <b>C4B</b>       | 9  | 41  | 28 | 26 | 19 | 17 | 10 | 15 | <b>2.66</b> |
| <b>TNFRSF17</b>  | 9  | 23  | 20 | 17 | 10 | 12 | 6  | 10 | <b>2.65</b> |
| <b>NOS2</b>      | 27 | 45  | 56 | 43 | 13 | 14 | 16 | 15 | <b>2.63</b> |
| <b>KIR2DS4</b>   | 33 | 41  | 80 | 51 | 29 | 22 | 19 | 23 | <b>2.63</b> |
| <b>C3</b>        | 9  | 5   | 12 | 9  | 4  | 3  | 3  | 4  | <b>2.62</b> |
| <b>NCAM1</b>     | 63 | 127 | 64 | 85 | 21 | 35 | 32 | 30 | <b>2.60</b> |
| <b>CXCR2</b>     | 36 | 54  | 28 | 39 | 23 | 31 | 15 | 23 | <b>2.60</b> |
| <b>CCL23</b>     | 9  | 5   | 20 | 11 | 3  | 10 | 4  | 6  | <b>2.58</b> |
| <b>PDCD1</b>     | 18 | 50  | 32 | 33 | 14 | 25 | 13 | 18 | <b>2.56</b> |
| <b>CSF2</b>      | 12 | 14  | 24 | 17 | 5  | 6  | 6  | 6  | <b>2.54</b> |
| <b>CCR8</b>      | 18 | 41  | 48 | 36 | 15 | 11 | 14 | 14 | <b>2.53</b> |
| <b>CCL26</b>     | 15 | 14  | 12 | 14 | 5  | 5  | 5  | 5  | <b>2.50</b> |
| <b>CXCL10</b>    | 9  | 32  | 8  | 16 | 12 | 10 | 6  | 10 | <b>2.50</b> |
| <b>IL13</b>      | 18 | 23  | 24 | 22 | 10 | 7  | 9  | 9  | <b>2.49</b> |
| <b>RAG2</b>      | 21 | 68  | 48 | 46 | 13 | 11 | 18 | 14 | <b>2.48</b> |
| <b>IL17B</b>     | 15 | 9   | 8  | 11 | 10 | 5  | 4  | 6  | <b>2.47</b> |
| <b>PPARG</b>     | 18 | 14  | 32 | 21 | 14 | 6  | 9  | 10 | <b>2.45</b> |
| <b>C6</b>        | 33 | 18  | 28 | 26 | 8  | 10 | 11 | 10 | <b>2.44</b> |
| <b>IL12B</b>     | 15 | 5   | 12 | 11 | 1  | 7  | 4  | 4  | <b>2.43</b> |
| <b>CDH5</b>      | 3  | 5   | 24 | 10 | 7  | 4  | 4  | 5  | <b>2.42</b> |
| <b>CCRL1</b>     | 3  | 5   | 16 | 8  | 7  | 4  | 3  | 5  | <b>2.41</b> |
| <b>CCL11</b>     | 9  | 18  | 4  | 10 | 7  | 4  | 4  | 5  | <b>2.40</b> |
| <b>IL5</b>       | 12 | 18  | 24 | 18 | 10 | 7  | 8  | 8  | <b>2.38</b> |
| <b>SRC</b>       | 15 | 27  | 4  | 15 | 9  | 6  | 6  | 7  | <b>2.37</b> |
| <b>TNFSF15</b>   | 30 | 68  | 24 | 41 | 16 | 20 | 17 | 18 | <b>2.35</b> |
| <b>TNFRSF11A</b> | 21 | 45  | 52 | 39 | 13 | 16 | 17 | 16 | <b>2.27</b> |
| <b>KIR3DL1</b>   | 57 | 68  | 52 | 59 | 36 | 44 | 26 | 36 | <b>2.27</b> |
| <b>IL7</b>       | 15 | 27  | 24 | 22 | 10 | 5  | 10 | 8  | <b>2.26</b> |
| <b>IL1RL2</b>    | 9  | 32  | 40 | 27 | 5  | 12 | 12 | 10 | <b>2.25</b> |
| <b>IL12A</b>     | 57 | 81  | 80 | 73 | 33 | 46 | 32 | 37 | <b>2.24</b> |
| <b>CXCL11</b>    | 3  | 18  | 8  | 10 | 4  | 8  | 4  | 6  | <b>2.24</b> |
| <b>LTF</b>       | 39 | 45  | 24 | 36 | 8  | 10 | 16 | 11 | <b>2.22</b> |
| <b>CCL19</b>     | 15 | 9   | 12 | 12 | 10 | 9  | 5  | 8  | <b>2.22</b> |
| <b>IL18</b>      | 42 | 50  | 52 | 48 | 23 | 30 | 22 | 25 | <b>2.21</b> |
| <b>ITGA2B</b>    | 15 | 41  | 52 | 36 | 25 | 25 | 16 | 22 | <b>2.21</b> |
| <b>CD274</b>     | 12 | 23  | 36 | 24 | 12 | 13 | 11 | 12 | <b>2.17</b> |
| <b>MME</b>       | 30 | 54  | 28 | 37 | 23 | 19 | 17 | 20 | <b>2.16</b> |
| <b>C1S</b>       | 33 | 36  | 28 | 32 | 19 | 20 | 15 | 18 | <b>2.14</b> |
| <b>BATF</b>      | 90 | 100 | 80 | 90 | 48 | 53 | 42 | 48 | <b>2.13</b> |
| <b>MUC1</b>      | 48 | 68  | 36 | 51 | 27 | 32 | 24 | 28 | <b>2.13</b> |
| <b>TAL1</b>      | 15 | 32  | 56 | 34 | 19 | 20 | 16 | 18 | <b>2.11</b> |
| <b>IL20</b>      | 18 | 54  | 44 | 39 | 5  | 8  | 18 | 11 | <b>2.10</b> |
| <b>KLRC1</b>     | 15 | 14  | 12 | 14 | 3  | 6  | 6  | 5  | <b>2.08</b> |
| <b>LIF</b>       | 9  | 18  | 20 | 16 | 2  | 3  | 8  | 4  | <b>2.07</b> |

|                |     |     |     |     |     |     |     |     |             |
|----------------|-----|-----|-----|-----|-----|-----|-----|-----|-------------|
| <b>CD9</b>     | 30  | 50  | 88  | 56  | 48  | 34  | 27  | 37  | <b>2.06</b> |
| <b>RORC</b>    | 45  | 81  | 60  | 62  | 46  | 34  | 30  | 37  | <b>2.05</b> |
| <b>TLR8</b>    | 57  | 68  | 48  | 58  | 33  | 34  | 28  | 32  | <b>2.05</b> |
| <b>CLEC5A</b>  | 15  | 18  | 20  | 18  | 4   | 9   | 9   | 7   | <b>2.04</b> |
| <b>IL10</b>    | 33  | 32  | 28  | 31  | 13  | 7   | 15  | 12  | <b>2.04</b> |
| <b>HFE</b>     | 18  | 14  | 28  | 20  | 11  | 9   | 10  | 10  | <b>2.04</b> |
| <b>MASP1</b>   | 12  | 9   | 12  | 11  | 4   | 7   | 5   | 6   | <b>2.04</b> |
| <b>TLR7</b>    | 30  | 41  | 48  | 40  | 18  | 10  | 19  | 16  | <b>2.03</b> |
| <b>CCL24</b>   | 12  | 45  | 28  | 28  | 5   | 12  | 14  | 11  | <b>2.02</b> |
| <b>IFI35</b>   | 45  | 68  | 44  | 52  | 30  | 23  | 26  | 26  | <b>2.01</b> |
| <b>BLNK</b>    | 15  | 14  | 4   | 11  | 11  | 3   | 5   | 6   | <b>2.01</b> |
| <b>CD24</b>    | 18  | 27  | 20  | 22  | 13  | 9   | 11  | 11  | <b>2.01</b> |
| <b>MARCO</b>   | 24  | 36  | 44  | 35  | 26  | 17  | 17  | 20  | <b>2.00</b> |
| <b>KIR2DS2</b> | 12  | 5   | 16  | 11  | 2   | 3   | 5   | 4   | <b>2.00</b> |
| <b>FAS</b>     | 24  | 36  | 24  | 28  | 21  | 16  | 14  | 17  | <b>1.99</b> |
| <b>MBP</b>     | 42  | 113 | 76  | 77  | 56  | 46  | 39  | 47  | <b>1.98</b> |
| <b>TLR5</b>    | 27  | 36  | 52  | 38  | 29  | 23  | 19  | 24  | <b>1.97</b> |
| <b>LILRA4</b>  | 3   | 23  | 32  | 19  | 7   | 10  | 10  | 9   | <b>1.97</b> |
| <b>CTSG</b>    | 6   | 9   | 4   | 6   | 4   | 4   | 3   | 4   | <b>1.95</b> |
| <b>ICAM4</b>   | 9   | 27  | 8   | 15  | 13  | 14  | 8   | 12  | <b>1.94</b> |
| <b>IL2</b>     | 9   | 18  | 36  | 21  | 11  | 12  | 11  | 11  | <b>1.94</b> |
| <b>HAMP</b>    | 30  | 23  | 4   | 19  | 8   | 8   | 10  | 9   | <b>1.94</b> |
| <b>C5</b>      | 21  | 32  | 48  | 34  | 12  | 18  | 17  | 16  | <b>1.94</b> |
| <b>C8A</b>     | 18  | 5   | 40  | 21  | 7   | 11  | 11  | 10  | <b>1.92</b> |
| <b>KIR3DS1</b> | 9   | 5   | 36  | 16  | 11  | 8   | 9   | 9   | <b>1.90</b> |
| <b>IL1R1</b>   | 6   | 14  | 36  | 18  | 10  | 6   | 10  | 9   | <b>1.90</b> |
| <b>C8G</b>     | 9   | 41  | 28  | 26  | 14  | 18  | 14  | 16  | <b>1.84</b> |
| <b>IL28A</b>   | 18  | 14  | 16  | 16  | 5   | 2   | 9   | 5   | <b>1.83</b> |
| <b>PDGFRB</b>  | 12  | 14  | 16  | 14  | 11  | 4   | 8   | 8   | <b>1.83</b> |
| <b>IL4</b>     | 15  | 18  | 20  | 18  | 21  | 18  | 10  | 16  | <b>1.82</b> |
| <b>CCL8</b>    | 21  | 32  | 12  | 22  | 13  | 14  | 12  | 13  | <b>1.81</b> |
| <b>CD40</b>    | 33  | 36  | 36  | 35  | 19  | 13  | 19  | 17  | <b>1.80</b> |
| <b>PAX5</b>    | 39  | 54  | 76  | 56  | 19  | 28  | 31  | 26  | <b>1.80</b> |
| <b>TNFSF10</b> | 15  | 14  | 12  | 14  | 5   | 13  | 8   | 9   | <b>1.78</b> |
| <b>SLAMF7</b>  | 54  | 54  | 48  | 52  | 26  | 24  | 29  | 27  | <b>1.78</b> |
| <b>CCL18</b>   | 3   | 14  | 24  | 14  | 10  | 11  | 8   | 10  | <b>1.78</b> |
| <b>IFNA2</b>   | 3   | 5   | 4   | 4   | 1   | 2   | 2   | 2   | <b>1.78</b> |
| <b>C1R</b>     | 48  | 86  | 68  | 67  | 42  | 44  | 38  | 41  | <b>1.78</b> |
| <b>IL21</b>    | 6   | 9   | 8   | 8   | 4   | 7   | 4   | 5   | <b>1.77</b> |
| <b>CX3CR1</b>  | 36  | 50  | 80  | 55  | 43  | 42  | 31  | 39  | <b>1.76</b> |
| <b>CMKLR1</b>  | 33  | 23  | 24  | 27  | 16  | 20  | 15  | 17  | <b>1.75</b> |
| <b>FOXP3</b>   | 422 | 457 | 335 | 404 | 268 | 299 | 233 | 267 | <b>1.74</b> |
| <b>GATA3</b>   | 48  | 86  | 80  | 71  | 43  | 57  | 41  | 47  | <b>1.73</b> |
| <b>PRDM1</b>   | 702 | 706 | 590 | 666 | 392 | 388 | 385 | 388 | <b>1.73</b> |

|                  |      |      |      |      |     |     |     |     |             |
|------------------|------|------|------|------|-----|-----|-----|-----|-------------|
| <b>CTLA4</b>     | 1130 | 1425 | 1048 | 1201 | 658 | 774 | 697 | 710 | <b>1.72</b> |
| <b>TNFRSF10C</b> | 6    | 23   | 16   | 15   | 5   | 15  | 9   | 10  | <b>1.72</b> |
| <b>CXCR3</b>     | 127  | 81   | 96   | 101  | 94  | 92  | 60  | 82  | <b>1.70</b> |
| <b>IL22RA2</b>   | 12   | 9    | 12   | 11   | 5   | 7   | 6   | 6   | <b>1.70</b> |
| <b>CD55</b>      | 57   | 72   | 52   | 60   | 35  | 33  | 36  | 35  | <b>1.69</b> |
| <b>PLA2G2A</b>   | 18   | 18   | 24   | 20   | 9   | 8   | 12  | 10  | <b>1.68</b> |
| <b>MAPK11</b>    | 39   | 59   | 44   | 47   | 23  | 36  | 28  | 29  | <b>1.68</b> |
| <b>MASP2</b>     | 30   | 32   | 40   | 34   | 9   | 16  | 21  | 15  | <b>1.65</b> |
| <b>TCF4</b>      | 21   | 14   | 28   | 21   | 14  | 21  | 13  | 16  | <b>1.61</b> |
| <b>LILRB2</b>    | 63   | 109  | 88   | 86   | 75  | 60  | 54  | 63  | <b>1.60</b> |
| <b>SERPING1</b>  | 21   | 14   | 12   | 16   | 8   | 13  | 10  | 10  | <b>1.60</b> |
| <b>MAF</b>       | 458  | 389  | 307  | 385  | 226 | 259 | 241 | 242 | <b>1.59</b> |
| <b>IL17A</b>     | 3    | 14   | 4    | 7    | 3   | 1   | 4   | 3   | <b>1.58</b> |
| <b>NCR1</b>      | 27   | 27   | 32   | 29   | 27  | 43  | 18  | 30  | <b>1.56</b> |
| <b>MSR1</b>      | 39   | 50   | 52   | 47   | 57  | 39  | 30  | 42  | <b>1.55</b> |
| <b>CLU</b>       | 6    | 5    | 24   | 11   | 2   | 7   | 8   | 6   | <b>1.52</b> |
| <b>C4BPA</b>     | 3    | 14   | 8    | 8    | 5   | 2   | 5   | 4   | <b>1.51</b> |
| <b>CCL7</b>      | 3    | 5    | 12   | 6    | 3   | 6   | 4   | 5   | <b>1.50</b> |
| <b>CD58</b>      | 226  | 258  | 267  | 250  | 151 | 199 | 168 | 172 | <b>1.49</b> |
| <b>MR1</b>       | 75   | 68   | 64   | 69   | 52  | 64  | 47  | 54  | <b>1.48</b> |
| <b>LILRB4</b>    | 12   | 23   | 32   | 22   | 18  | 18  | 15  | 17  | <b>1.46</b> |
| <b>TBK1</b>      | 96   | 95   | 84   | 92   | 79  | 93  | 63  | 78  | <b>1.46</b> |
| <b>FCGR2B</b>    | 54   | 68   | 52   | 58   | 42  | 36  | 40  | 39  | <b>1.45</b> |
| <b>KLRD1</b>     | 69   | 63   | 60   | 64   | 53  | 52  | 44  | 50  | <b>1.45</b> |
| <b>C4A</b>       | 33   | 36   | 60   | 43   | 40  | 26  | 30  | 32  | <b>1.42</b> |
| <b>TBX21</b>     | 84   | 118  | 116  | 106  | 81  | 87  | 75  | 81  | <b>1.42</b> |
| <b>TIGIT</b>     | 322  | 339  | 299  | 320  | 238 | 266 | 226 | 243 | <b>1.42</b> |
| <b>LILRB3</b>    | 51   | 86   | 88   | 75   | 46  | 67  | 53  | 55  | <b>1.41</b> |
| <b>IL1RAP</b>    | 60   | 100  | 56   | 72   | 68  | 69  | 51  | 63  | <b>1.41</b> |
| <b>TBP</b>       | 60   | 63   | 68   | 64   | 46  | 59  | 45  | 50  | <b>1.40</b> |
| <b>GP1BB</b>     | 57   | 32   | 24   | 38   | 34  | 38  | 27  | 33  | <b>1.39</b> |
| <b>IRF5</b>      | 15   | 14   | 12   | 14   | 15  | 20  | 10  | 15  | <b>1.39</b> |
| <b>C1QA</b>      | 6    | 5    | 12   | 8    | 4   | 4   | 5   | 5   | <b>1.39</b> |
| <b>LILRA6</b>    | 54   | 81   | 40   | 58   | 34  | 40  | 42  | 39  | <b>1.39</b> |
| <b>MS4A1</b>     | 117  | 104  | 116  | 112  | 86  | 87  | 81  | 85  | <b>1.38</b> |
| <b>CIITA</b>     | 45   | 104  | 48   | 66   | 41  | 47  | 48  | 45  | <b>1.38</b> |
| <b>CASP1</b>     | 286  | 416  | 299  | 334  | 278 | 250 | 242 | 257 | <b>1.38</b> |
| <b>IL1A</b>      | 6    | 23   | 16   | 15   | 7   | 15  | 11  | 11  | <b>1.37</b> |
| <b>IL2RA</b>     | 380  | 375  | 383  | 379  | 308 | 331 | 277 | 305 | <b>1.37</b> |
| <b>NCF4</b>      | 178  | 222  | 247  | 215  | 148 | 167 | 159 | 158 | <b>1.35</b> |
| <b>TIRAP</b>     | 33   | 36   | 40   | 36   | 34  | 35  | 27  | 32  | <b>1.34</b> |
| <b>IL18R1</b>    | 69   | 127  | 56   | 84   | 88  | 88  | 63  | 80  | <b>1.34</b> |
| <b>TLR4</b>      | 42   | 68   | 72   | 61   | 47  | 43  | 45  | 45  | <b>1.33</b> |
| <b>CD244</b>     | 99   | 50   | 84   | 78   | 53  | 48  | 58  | 53  | <b>1.33</b> |

|                 |      |      |      |      |      |      |      |      |             |
|-----------------|------|------|------|------|------|------|------|------|-------------|
| <b>SMAD5</b>    | 42   | 100  | 56   | 66   | 64   | 82   | 50   | 65   | <b>1.32</b> |
| <b>PTPN22</b>   | 274  | 317  | 223  | 271  | 248  | 224  | 206  | 226  | <b>1.32</b> |
| <b>IRAK3</b>    | 87   | 68   | 72   | 76   | 63   | 55   | 57   | 58   | <b>1.32</b> |
| <b>CD40LG</b>   | 57   | 118  | 120  | 98   | 80   | 84   | 75   | 80   | <b>1.31</b> |
| <b>IRF8</b>     | 72   | 68   | 56   | 65   | 60   | 82   | 50   | 64   | <b>1.31</b> |
| <b>IRF4</b>     | 208  | 199  | 159  | 189  | 140  | 175  | 144  | 153  | <b>1.31</b> |
| <b>KIR2DS5</b>  | 12   | 18   | 12   | 14   | 13   | 10   | 11   | 11   | <b>1.30</b> |
| <b>CD8B</b>     | 30   | 14   | 36   | 27   | 30   | 31   | 21   | 27   | <b>1.29</b> |
| <b>CD22</b>     | 63   | 72   | 52   | 62   | 56   | 56   | 49   | 53   | <b>1.28</b> |
| <b>TLR2</b>     | 60   | 86   | 64   | 70   | 68   | 55   | 55   | 59   | <b>1.27</b> |
| <b>FADD</b>     | 51   | 41   | 48   | 47   | 34   | 36   | 37   | 36   | <b>1.27</b> |
| <b>IFIT2</b>    | 39   | 36   | 48   | 41   | 34   | 39   | 32   | 35   | <b>1.26</b> |
| <b>LTB4R2</b>   | 75   | 54   | 84   | 71   | 57   | 73   | 56   | 62   | <b>1.26</b> |
| <b>SELPLG</b>   | 51   | 68   | 44   | 54   | 32   | 51   | 43   | 42   | <b>1.25</b> |
| <b>CD19</b>     | 30   | 32   | 36   | 33   | 16   | 16   | 26   | 20   | <b>1.25</b> |
| <b>IL3</b>      | 15   | 14   | 16   | 15   | 12   | 6    | 12   | 10   | <b>1.25</b> |
| <b>PDCD2</b>    | 214  | 222  | 279  | 238  | 214  | 214  | 192  | 207  | <b>1.24</b> |
| <b>PTGS2</b>    | 48   | 86   | 80   | 71   | 53   | 38   | 57   | 49   | <b>1.24</b> |
| <b>LILRA1</b>   | 21   | 68   | 60   | 50   | 31   | 39   | 40   | 37   | <b>1.24</b> |
| <b>ALAS1</b>    | 39   | 45   | 60   | 48   | 34   | 18   | 39   | 30   | <b>1.23</b> |
| <b>HLA-DOB</b>  | 78   | 81   | 68   | 76   | 79   | 64   | 62   | 68   | <b>1.23</b> |
| <b>CD79A</b>    | 81   | 100  | 104  | 95   | 96   | 101  | 78   | 92   | <b>1.22</b> |
| <b>IRF7</b>     | 202  | 204  | 251  | 219  | 171  | 211  | 181  | 188  | <b>1.21</b> |
| <b>CTSC</b>     | 614  | 706  | 478  | 599  | 481  | 503  | 496  | 493  | <b>1.21</b> |
| <b>CD86</b>     | 102  | 127  | 108  | 112  | 98   | 128  | 93   | 106  | <b>1.21</b> |
| <b>IKZF2</b>    | 337  | 393  | 283  | 338  | 335  | 322  | 281  | 313  | <b>1.20</b> |
| <b>CCR6</b>     | 175  | 244  | 171  | 197  | 149  | 160  | 165  | 158  | <b>1.20</b> |
| <b>CFP</b>      | 24   | 41   | 48   | 38   | 46   | 39   | 31   | 39   | <b>1.20</b> |
| <b>MAPKAPK2</b> | 304  | 421  | 327  | 351  | 310  | 347  | 293  | 317  | <b>1.20</b> |
| <b>SLAMF1</b>   | 81   | 77   | 32   | 63   | 42   | 40   | 53   | 45   | <b>1.19</b> |
| <b>PRF1</b>     | 322  | 339  | 323  | 328  | 275  | 339  | 277  | 297  | <b>1.18</b> |
| <b>TMEM173</b>  | 648  | 665  | 538  | 617  | 622  | 612  | 522  | 585  | <b>1.18</b> |
| <b>TNFSF13B</b> | 81   | 95   | 96   | 91   | 102  | 94   | 77   | 91   | <b>1.18</b> |
| <b>PML</b>      | 42   | 104  | 64   | 70   | 48   | 75   | 60   | 61   | <b>1.18</b> |
| <b>CLEC4A</b>   | 36   | 122  | 108  | 89   | 87   | 80   | 76   | 81   | <b>1.17</b> |
| <b>CASP8</b>    | 952  | 1045 | 734  | 910  | 765  | 763  | 780  | 769  | <b>1.17</b> |
| <b>TNFRSF4</b>  | 87   | 63   | 68   | 73   | 65   | 78   | 63   | 68   | <b>1.16</b> |
| <b>FCGR3A</b>   | 256  | 226  | 195  | 226  | 204  | 224  | 195  | 208  | <b>1.16</b> |
| <b>HLA-DPB1</b> | 798  | 941  | 749  | 829  | 752  | 832  | 719  | 768  | <b>1.15</b> |
| <b>IL23A</b>    | 45   | 59   | 76   | 60   | 44   | 66   | 52   | 54   | <b>1.15</b> |
| <b>TRAF3</b>    | 154  | 149  | 128  | 143  | 116  | 137  | 124  | 126  | <b>1.15</b> |
| <b>CD99</b>     | 1295 | 1379 | 1132 | 1269 | 1134 | 1229 | 1103 | 1155 | <b>1.15</b> |
| <b>POLR1B</b>   | 63   | 23   | 52   | 46   | 44   | 50   | 40   | 44   | <b>1.15</b> |
| <b>DEFB4A</b>   | 9    | 9    | 8    | 9    | 4    | 8    | 8    | 7    | <b>1.15</b> |

|                  |      |      |      |      |      |      |      |      |             |
|------------------|------|------|------|------|------|------|------|------|-------------|
| <b>HLA-DQA1</b>  | 259  | 294  | 271  | 275  | 267  | 262  | 240  | 256  | <b>1.14</b> |
| <b>CFD</b>       | 69   | 77   | 64   | 70   | 47   | 66   | 62   | 58   | <b>1.13</b> |
| <b>TNFRSF1B</b>  | 404  | 493  | 327  | 408  | 401  | 415  | 360  | 392  | <b>1.13</b> |
| <b>CD82</b>      | 108  | 149  | 116  | 124  | 126  | 120  | 110  | 119  | <b>1.13</b> |
| <b>PSMB9</b>     | 473  | 498  | 446  | 472  | 418  | 491  | 420  | 443  | <b>1.12</b> |
| <b>IL12RB1</b>   | 111  | 118  | 92   | 107  | 111  | 83   | 95   | 96   | <b>1.12</b> |
| <b>ITGAM</b>     | 223  | 339  | 219  | 260  | 187  | 232  | 234  | 218  | <b>1.11</b> |
| <b>IL1R2</b>     | 21   | 18   | 40   | 26   | 14   | 22   | 24   | 20   | <b>1.11</b> |
| <b>LILRB1</b>    | 15   | 27   | 44   | 29   | 26   | 29   | 26   | 27   | <b>1.10</b> |
| <b>CD36</b>      | 244  | 267  | 195  | 235  | 254  | 242  | 213  | 236  | <b>1.10</b> |
| <b>CD74</b>      | 6057 | 6544 | 5589 | 6064 | 5599 | 6022 | 5522 | 5714 | <b>1.10</b> |
| <b>IL10RA</b>    | 1416 | 1655 | 1343 | 1471 | 1350 | 1427 | 1341 | 1373 | <b>1.10</b> |
| <b>IL2RB</b>     | 639  | 782  | 626  | 682  | 613  | 707  | 622  | 648  | <b>1.10</b> |
| <b>VCAM1</b>     | 3    | 9    | 20   | 11   | 4    | 7    | 10   | 7    | <b>1.09</b> |
| <b>CLEC4E</b>    | 39   | 54   | 56   | 50   | 49   | 61   | 45   | 52   | <b>1.09</b> |
| <b>GPI</b>       | 440  | 430  | 371  | 413  | 401  | 475  | 380  | 419  | <b>1.09</b> |
| <b>FCER1A</b>    | 217  | 289  | 195  | 234  | 240  | 255  | 215  | 236  | <b>1.09</b> |
| <b>MYD88</b>     | 449  | 552  | 462  | 488  | 494  | 514  | 450  | 486  | <b>1.08</b> |
| <b>CD2</b>       | 464  | 375  | 454  | 431  | 418  | 440  | 398  | 419  | <b>1.08</b> |
| <b>FCGR2A</b>    | 99   | 149  | 104  | 117  | 107  | 103  | 109  | 106  | <b>1.07</b> |
| <b>SYK</b>       | 117  | 127  | 84   | 109  | 88   | 135  | 102  | 108  | <b>1.07</b> |
| <b>HLA-DPA1</b>  | 1054 | 1407 | 1052 | 1171 | 1049 | 1142 | 1097 | 1096 | <b>1.07</b> |
| <b>GUSB</b>      | 99   | 118  | 88   | 102  | 96   | 103  | 95   | 98   | <b>1.07</b> |
| <b>PTAFR</b>     | 30   | 45   | 32   | 36   | 33   | 29   | 34   | 32   | <b>1.07</b> |
| <b>ADA</b>       | 120  | 104  | 132  | 119  | 133  | 133  | 111  | 126  | <b>1.06</b> |
| <b>CD14</b>      | 756  | 805  | 682  | 748  | 685  | 749  | 702  | 712  | <b>1.06</b> |
| <b>CHUK</b>      | 232  | 375  | 263  | 290  | 293  | 290  | 273  | 285  | <b>1.06</b> |
| <b>HLA-DRB1</b>  | 2605 | 3021 | 2424 | 2683 | 2679 | 2882 | 2523 | 2695 | <b>1.06</b> |
| <b>TP53</b>      | 205  | 208  | 235  | 216  | 187  | 220  | 203  | 203  | <b>1.06</b> |
| <b>KIR3DL2</b>   | 12   | 14   | 40   | 22   | 18   | 12   | 21   | 17   | <b>1.06</b> |
| <b>IFIH1</b>     | 60   | 109  | 96   | 88   | 103  | 74   | 83   | 87   | <b>1.06</b> |
| <b>HLA-DQB1</b>  | 108  | 113  | 100  | 107  | 82   | 86   | 102  | 90   | <b>1.05</b> |
| <b>ICOS</b>      | 602  | 660  | 566  | 610  | 578  | 603  | 582  | 588  | <b>1.05</b> |
| <b>IL32</b>      | 5747 | 8462 | 7774 | 7328 | 7726 | 6348 | 7010 | 7028 | <b>1.05</b> |
| <b>TFRC</b>      | 596  | 674  | 558  | 609  | 598  | 620  | 584  | 601  | <b>1.04</b> |
| <b>BTK</b>       | 99   | 95   | 80   | 91   | 96   | 87   | 88   | 90   | <b>1.04</b> |
| <b>TNFRSF13C</b> | 226  | 258  | 199  | 228  | 211  | 237  | 219  | 222  | <b>1.04</b> |
| <b>CASP3</b>     | 93   | 68   | 68   | 76   | 75   | 72   | 74   | 73   | <b>1.04</b> |
| <b>IL6R</b>      | 223  | 204  | 223  | 217  | 218  | 244  | 209  | 224  | <b>1.04</b> |
| <b>HLA-DRB3</b>  | 1084 | 1022 | 1021 | 1042 | 1002 | 1089 | 1007 | 1033 | <b>1.04</b> |
| <b>IKBKAP</b>    | 60   | 50   | 44   | 51   | 38   | 29   | 50   | 39   | <b>1.03</b> |
| <b>TAP1</b>      | 108  | 163  | 163  | 145  | 130  | 173  | 141  | 148  | <b>1.03</b> |
| <b>KIR2DS3</b>   | 3    | 9    | 8    | 7    | 3    | 11   | 6    | 7    | <b>1.03</b> |
| <b>MAP4K1</b>    | 419  | 511  | 403  | 444  | 380  | 447  | 432  | 420  | <b>1.03</b> |

|         |       |       |      |       |       |       |       |       |      |
|---------|-------|-------|------|-------|-------|-------|-------|-------|------|
| LTA     | 75    | 113   | 108  | 99    | 116   | 93    | 96    | 102   | 1.02 |
| CD28    | 1566  | 1995  | 1363 | 1641  | 1605  | 1656  | 1612  | 1624  | 1.02 |
| GZMA    | 190   | 253   | 187  | 210   | 190   | 193   | 207   | 197   | 1.02 |
| ITGB1   | 1307  | 1348  | 1104 | 1253  | 1234  | 1330  | 1233  | 1266  | 1.02 |
| G6PD    | 175   | 127   | 128  | 143   | 144   | 146   | 141   | 144   | 1.02 |
| FCGR2C  | 313   | 538   | 287  | 379   | 387   | 426   | 376   | 396   | 1.01 |
| TNFSF12 | 274   | 317   | 239  | 277   | 305   | 322   | 274   | 301   | 1.01 |
| GAPDH   | 2901  | 3062  | 2711 | 2891  | 2848  | 3087  | 2869  | 2935  | 1.01 |
| CSF2RB  | 232   | 222   | 167  | 207   | 210   | 253   | 206   | 223   | 1.01 |
| CD27    | 584   | 592   | 578  | 585   | 604   | 640   | 581   | 609   | 1.01 |
| HLA-DRA | 2602  | 3094  | 2595 | 2764  | 2765  | 2968  | 2764  | 2833  | 1.00 |
| HLA-DMB | 229   | 267   | 179  | 225   | 191   | 215   | 225   | 210   | 1.00 |
| SH2D1A  | 136   | 185   | 140  | 154   | 151   | 142   | 154   | 149   | 1.00 |
| CSF1    | 24    | 27    | 20   | 24    | 29    | 23    | 24    | 25    | 1.00 |
| TUBB    | 428   | 475   | 343  | 415   | 445   | 461   | 419   | 441   | 0.99 |
| CCR10   | 42    | 41    | 20   | 34    | 27    | 29    | 35    | 30    | 0.99 |
| TRAF5   | 87    | 190   | 92   | 123   | 119   | 116   | 124   | 120   | 0.99 |
| CD8A    | 102   | 72    | 88   | 87    | 103   | 98    | 89    | 97    | 0.99 |
| KLRB1   | 801   | 733   | 610  | 715   | 714   | 824   | 725   | 755   | 0.99 |
| HPRT1   | 187   | 222   | 179  | 196   | 179   | 216   | 199   | 198   | 0.98 |
| CD59    | 250   | 353   | 243  | 282   | 267   | 269   | 288   | 275   | 0.98 |
| CCL2    | 6     | 27    | 24   | 19    | 8     | 8     | 19    | 12    | 0.98 |
| OAZ1    | 1298  | 1402  | 1096 | 1266  | 1406  | 1479  | 1300  | 1395  | 0.97 |
| CYBB    | 648   | 710   | 486  | 615   | 616   | 609   | 632   | 619   | 0.97 |
| CSF1R   | 30    | 45    | 32   | 36    | 25    | 35    | 37    | 32    | 0.97 |
| ITGAX   | 208   | 280   | 255  | 248   | 249   | 285   | 255   | 263   | 0.97 |
| CSF3R   | 250   | 267   | 243  | 253   | 265   | 291   | 262   | 273   | 0.97 |
| JAK2    | 617   | 692   | 570  | 627   | 706   | 705   | 648   | 687   | 0.97 |
| GFI1    | 36    | 81    | 52   | 56    | 52    | 68    | 58    | 59    | 0.97 |
| FCER1G  | 940   | 1045  | 789  | 925   | 976   | 1047  | 961   | 994   | 0.96 |
| POU2F2  | 268   | 303   | 275  | 282   | 327   | 325   | 293   | 315   | 0.96 |
| CASP2   | 238   | 253   | 175  | 222   | 219   | 231   | 232   | 227   | 0.96 |
| TGFBR1  | 117   | 176   | 179  | 158   | 175   | 145   | 165   | 162   | 0.96 |
| CARD9   | 42    | 41    | 48   | 44    | 46    | 41    | 45    | 44    | 0.96 |
| HLA-C   | 10371 | 11519 | 8898 | 10263 | 10844 | 11836 | 10715 | 11132 | 0.96 |
| ICOSLG  | 124   | 77    | 120  | 107   | 136   | 146   | 111   | 131   | 0.96 |
| BCL3    | 491   | 498   | 506  | 498   | 528   | 543   | 522   | 531   | 0.96 |
| IL2RG   | 1289  | 1316  | 1072 | 1226  | 1240  | 1390  | 1284  | 1305  | 0.96 |
| PTGER4  | 220   | 335   | 263  | 273   | 329   | 349   | 287   | 321   | 0.95 |
| IFNAR2  | 443   | 602   | 578  | 541   | 586   | 658   | 569   | 604   | 0.95 |
| TGFBI   | 310   | 339   | 307  | 319   | 400   | 394   | 337   | 377   | 0.95 |
| STAT1   | 298   | 339   | 319  | 319   | 369   | 394   | 337   | 367   | 0.95 |
| STAT2   | 386   | 344   | 251  | 327   | 405   | 446   | 345   | 399   | 0.95 |
| IKZF3   | 193   | 204   | 203  | 200   | 237   | 258   | 212   | 236   | 0.94 |

|         |       |       |       |       |       |       |       |       |             |
|---------|-------|-------|-------|-------|-------|-------|-------|-------|-------------|
| CD44    | 892   | 963   | 829   | 895   | 959   | 1062  | 950   | 990   | <b>0.94</b> |
| ICAM3   | 1111  | 1398  | 1092  | 1200  | 1238  | 1374  | 1277  | 1296  | <b>0.94</b> |
| NFIL3   | 93    | 100   | 88    | 94    | 119   | 105   | 100   | 108   | <b>0.94</b> |
| HLA-A   | 14895 | 17055 | 13458 | 15136 | 15963 | 17005 | 16171 | 16380 | <b>0.94</b> |
| SMAD3   | 367   | 475   | 339   | 394   | 394   | 426   | 421   | 414   | <b>0.94</b> |
| PSMB8   | 630   | 710   | 646   | 662   | 708   | 745   | 708   | 720   | <b>0.94</b> |
| TLR1    | 105   | 149   | 88    | 114   | 129   | 130   | 122   | 127   | <b>0.93</b> |
| NFATC2  | 404   | 443   | 379   | 409   | 450   | 527   | 438   | 472   | <b>0.93</b> |
| FCAR    | 60    | 41    | 96    | 66    | 74    | 70    | 70    | 71    | <b>0.93</b> |
| BCAP31  | 404   | 448   | 343   | 398   | 431   | 501   | 428   | 453   | <b>0.93</b> |
| MAP4K4  | 443   | 416   | 407   | 422   | 509   | 486   | 453   | 483   | <b>0.93</b> |
| ARHGDI3 | 5422  | 6246  | 5039  | 5569  | 6030  | 6685  | 5995  | 6236  | <b>0.93</b> |
| TNF     | 102   | 154   | 124   | 127   | 148   | 188   | 136   | 158   | <b>0.93</b> |
| PSMC2   | 491   | 534   | 387   | 470   | 501   | 556   | 509   | 522   | <b>0.92</b> |
| PTPN2   | 277   | 344   | 259   | 293   | 320   | 339   | 318   | 326   | <b>0.92</b> |
| IKBKG   | 178   | 231   | 112   | 173   | 186   | 219   | 188   | 198   | <b>0.92</b> |
| IGF2R   | 39    | 118   | 64    | 74    | 68    | 98    | 80    | 82    | <b>0.92</b> |
| RUNX1   | 259   | 222   | 243   | 241   | 286   | 318   | 263   | 289   | <b>0.92</b> |
| MX1     | 349   | 366   | 279   | 332   | 332   | 376   | 363   | 357   | <b>0.91</b> |
| ITGA4   | 241   | 294   | 263   | 266   | 291   | 307   | 291   | 296   | <b>0.91</b> |
| CD164   | 702   | 796   | 526   | 675   | 754   | 919   | 739   | 804   | <b>0.91</b> |
| LILRA3  | 90    | 149   | 151   | 130   | 145   | 141   | 143   | 143   | <b>0.91</b> |
| IFI16   | 337   | 393   | 255   | 329   | 324   | 387   | 360   | 357   | <b>0.91</b> |
| LTBR    | 78    | 63    | 116   | 86    | 77    | 84    | 94    | 85    | <b>0.91</b> |
| TOLLIP  | 90    | 86    | 84    | 87    | 119   | 111   | 95    | 108   | <b>0.91</b> |
| TYK2    | 229   | 222   | 263   | 238   | 260   | 295   | 262   | 272   | <b>0.91</b> |
| CD4     | 404   | 547   | 439   | 463   | 468   | 525   | 513   | 502   | <b>0.90</b> |
| ABL1    | 48    | 118   | 104   | 90    | 86    | 99    | 100   | 95    | <b>0.90</b> |
| FCGRT   | 343   | 371   | 283   | 332   | 404   | 411   | 370   | 395   | <b>0.90</b> |
| AHR     | 605   | 755   | 466   | 609   | 704   | 684   | 679   | 689   | <b>0.90</b> |
| C1QBP   | 313   | 403   | 339   | 352   | 386   | 438   | 392   | 405   | <b>0.90</b> |
| HLA-B   | 15073 | 17901 | 14682 | 15885 | 17722 | 19959 | 17714 | 18465 | <b>0.90</b> |
| IL1RL1  | 6     | 5     | 4     | 5     | 5     | 3     | 5     | 5     | <b>0.90</b> |
| POLR2A  | 970   | 1072  | 873   | 972   | 1143  | 1283  | 1086  | 1170  | <b>0.90</b> |
| ABCF1   | 259   | 271   | 259   | 263   | 310   | 328   | 294   | 311   | <b>0.89</b> |
| TRAF2   | 87    | 59    | 92    | 79    | 68    | 80    | 89    | 79    | <b>0.89</b> |
| XBP1    | 238   | 276   | 199   | 238   | 313   | 284   | 266   | 288   | <b>0.89</b> |
| CD5     | 1368  | 1474  | 1100  | 1314  | 1417  | 1695  | 1472  | 1528  | <b>0.89</b> |
| LILRA2  | 69    | 95    | 88    | 84    | 104   | 84    | 94    | 94    | <b>0.89</b> |
| B2M     | 55950 | 65127 | 51621 | 57566 | 65294 | 68772 | 64632 | 66233 | <b>0.89</b> |
| CCL4    | 45    | 77    | 28    | 50    | 49    | 60    | 56    | 55    | <b>0.89</b> |
| CD97    | 1093  | 1248  | 929   | 1090  | 1283  | 1403  | 1228  | 1305  | <b>0.89</b> |
| TAP2    | 136   | 181   | 104   | 140   | 160   | 188   | 158   | 169   | <b>0.89</b> |
| ICAM2   | 355   | 366   | 291   | 338   | 418   | 454   | 381   | 417   | <b>0.89</b> |



|                 |      |      |      |      |      |      |      |      |             |
|-----------------|------|------|------|------|------|------|------|------|-------------|
| <b>IRGM</b>     | 9    | 41   | 28   | 26   | 25   | 36   | 29   | 30   | <b>0.89</b> |
| <b>IL13RA1</b>  | 99   | 72   | 96   | 89   | 99   | 94   | 101  | 98   | <b>0.89</b> |
| <b>PDCD1LG2</b> | 15   | 5    | 12   | 11   | 13   | 13   | 12   | 13   | <b>0.88</b> |
| <b>NOTCH1</b>   | 142  | 149  | 187  | 159  | 181  | 199  | 181  | 187  | <b>0.88</b> |
| <b>IRF1</b>     | 684  | 724  | 606  | 671  | 795  | 843  | 763  | 800  | <b>0.88</b> |
| <b>PTPN6</b>    | 395  | 502  | 375  | 424  | 455  | 480  | 483  | 472  | <b>0.88</b> |
| <b>TGFB1</b>    | 2566 | 2714 | 2292 | 2524 | 2843 | 3073 | 2876 | 2931 | <b>0.88</b> |
| <b>TAPBP</b>    | 1346 | 1506 | 1100 | 1318 | 1598 | 1581 | 1504 | 1561 | <b>0.88</b> |
| <b>LY96</b>     | 54   | 86   | 76   | 72   | 79   | 50   | 82   | 70   | <b>0.87</b> |
| <b>IRAK1</b>    | 349  | 375  | 327  | 351  | 436  | 440  | 402  | 426  | <b>0.87</b> |
| <b>IKBKE</b>    | 229  | 199  | 175  | 201  | 231  | 228  | 231  | 230  | <b>0.87</b> |
| <b>BST1</b>     | 90   | 109  | 132  | 110  | 127  | 136  | 127  | 130  | <b>0.87</b> |
| <b>TRAF1</b>    | 919  | 1072 | 821  | 937  | 1072 | 1142 | 1081 | 1098 | <b>0.87</b> |
| <b>RARRES3</b>  | 316  | 398  | 391  | 368  | 448  | 478  | 426  | 451  | <b>0.86</b> |
| <b>STAT5B</b>   | 789  | 805  | 638  | 744  | 848  | 894  | 863  | 868  | <b>0.86</b> |
| <b>ITGB2</b>    | 1627 | 1719 | 1599 | 1648 | 1888 | 2100 | 1911 | 1966 | <b>0.86</b> |
| <b>CD3E</b>     | 1985 | 2293 | 1774 | 2017 | 2344 | 2639 | 2347 | 2443 | <b>0.86</b> |
| <b>RELA</b>     | 307  | 299  | 227  | 278  | 335  | 358  | 324  | 339  | <b>0.86</b> |
| <b>PRKCD</b>    | 142  | 149  | 124  | 138  | 127  | 165  | 161  | 151  | <b>0.86</b> |
| <b>ZAP70</b>    | 961  | 1036 | 825  | 941  | 1206 | 1168 | 1099 | 1158 | <b>0.86</b> |
| <b>CD3D</b>     | 1121 | 1284 | 985  | 1130 | 1361 | 1389 | 1323 | 1358 | <b>0.85</b> |
| <b>TNFRSF14</b> | 340  | 371  | 291  | 334  | 392  | 452  | 392  | 412  | <b>0.85</b> |
| <b>CD6</b>      | 693  | 837  | 654  | 728  | 866  | 938  | 854  | 886  | <b>0.85</b> |
| <b>TRAF6</b>    | 265  | 339  | 275  | 293  | 337  | 394  | 344  | 358  | <b>0.85</b> |
| <b>CD53</b>     | 467  | 629  | 486  | 527  | 585  | 645  | 622  | 617  | <b>0.85</b> |
| <b>JAK3</b>     | 506  | 583  | 450  | 513  | 638  | 740  | 607  | 662  | <b>0.85</b> |
| <b>SELL</b>     | 1229 | 1416 | 1136 | 1260 | 1529 | 1636 | 1497 | 1554 | <b>0.84</b> |
| <b>NOTCH2</b>   | 310  | 434  | 323  | 356  | 477  | 459  | 423  | 453  | <b>0.84</b> |
| <b>PSMB7</b>    | 575  | 674  | 522  | 590  | 661  | 694  | 702  | 686  | <b>0.84</b> |
| <b>IL18RAP</b>  | 39   | 45   | 44   | 43   | 40   | 58   | 51   | 49   | <b>0.84</b> |
| <b>CISH</b>     | 27   | 5    | 12   | 15   | 4    | 15   | 17   | 12   | <b>0.84</b> |
| <b>CD247</b>    | 1407 | 1664 | 1228 | 1433 | 1645 | 1871 | 1709 | 1742 | <b>0.84</b> |
| <b>IL11RA</b>   | 361  | 384  | 347  | 364  | 443  | 510  | 435  | 463  | <b>0.84</b> |
| <b>MAP4K2</b>   | 407  | 525  | 403  | 445  | 548  | 538  | 534  | 540  | <b>0.83</b> |
| <b>IL21R</b>    | 117  | 77   | 60   | 85   | 105  | 122  | 102  | 110  | <b>0.83</b> |
| <b>SIGIRR</b>   | 904  | 1054 | 849  | 936  | 1162 | 1232 | 1123 | 1173 | <b>0.83</b> |
| <b>IRAK4</b>    | 265  | 339  | 335  | 313  | 349  | 381  | 377  | 369  | <b>0.83</b> |
| <b>TRAF4</b>    | 120  | 140  | 112  | 124  | 159  | 170  | 149  | 159  | <b>0.83</b> |
| <b>NFATC3</b>   | 410  | 412  | 470  | 431  | 499  | 523  | 518  | 514  | <b>0.83</b> |
| <b>LCK</b>      | 1042 | 1239 | 957  | 1079 | 1259 | 1451 | 1300 | 1337 | <b>0.83</b> |
| <b>BST2</b>     | 214  | 226  | 247  | 229  | 255  | 282  | 276  | 271  | <b>0.83</b> |
| <b>MAPK1</b>    | 277  | 389  | 355  | 340  | 367  | 432  | 411  | 404  | <b>0.83</b> |
| <b>PSMB10</b>   | 545  | 615  | 538  | 566  | 642  | 737  | 685  | 688  | <b>0.83</b> |
| <b>ETS1</b>     | 4943 | 5500 | 4596 | 5013 | 6273 | 6588 | 6083 | 6315 | <b>0.82</b> |

|                |      |      |      |      |      |      |      |      |             |
|----------------|------|------|------|------|------|------|------|------|-------------|
| <b>RELB</b>    | 84   | 118  | 92   | 98   | 141  | 129  | 119  | 130  | <b>0.82</b> |
| <b>LCP2</b>    | 1108 | 1199 | 1076 | 1128 | 1362 | 1506 | 1373 | 1414 | <b>0.82</b> |
| <b>CCL5</b>    | 247  | 244  | 255  | 249  | 302  | 308  | 303  | 304  | <b>0.82</b> |
| <b>BID</b>     | 78   | 90   | 60   | 76   | 96   | 66   | 93   | 85   | <b>0.82</b> |
| <b>STAT6</b>   | 816  | 850  | 821  | 829  | 1104 | 1164 | 1014 | 1094 | <b>0.82</b> |
| <b>PLAUR</b>   | 407  | 493  | 363  | 421  | 491  | 534  | 515  | 514  | <b>0.82</b> |
| <b>PSMB5</b>   | 3    | 18   | 8    | 10   | 5    | 9    | 12   | 9    | <b>0.81</b> |
| <b>PSMD7</b>   | 624  | 787  | 674  | 695  | 834  | 781  | 854  | 823  | <b>0.81</b> |
| <b>PTPRC</b>   | 3627 | 4025 | 3500 | 3717 | 4638 | 4948 | 4574 | 4720 | <b>0.81</b> |
| <b>ITGAL</b>   | 479  | 579  | 450  | 503  | 623  | 661  | 621  | 635  | <b>0.81</b> |
| <b>IFNAR1</b>  | 36   | 68   | 48   | 51   | 48   | 72   | 63   | 61   | <b>0.81</b> |
| <b>ATG16L1</b> | 349  | 326  | 371  | 349  | 416  | 460  | 435  | 437  | <b>0.80</b> |
| <b>PPIA</b>    | 208  | 258  | 203  | 223  | 274  | 287  | 280  | 280  | <b>0.80</b> |
| <b>JAK1</b>    | 1696 | 2017 | 1662 | 1792 | 2227 | 2351 | 2264 | 2281 | <b>0.79</b> |
| <b>ICAM1</b>   | 60   | 50   | 44   | 51   | 65   | 75   | 65   | 68   | <b>0.79</b> |
| <b>GNLY</b>    | 184  | 204  | 243  | 210  | 230  | 268  | 266  | 255  | <b>0.79</b> |
| <b>IL16</b>    | 491  | 439  | 431  | 453  | 549  | 663  | 575  | 596  | <b>0.79</b> |
| <b>BCL6</b>    | 190  | 249  | 191  | 210  | 279  | 311  | 266  | 285  | <b>0.79</b> |
| <b>GZMB</b>    | 105  | 163  | 112  | 127  | 162  | 173  | 162  | 166  | <b>0.78</b> |
| <b>TNFSF8</b>  | 21   | 50   | 28   | 33   | 55   | 53   | 42   | 50   | <b>0.78</b> |
| <b>IKBKB</b>   | 72   | 95   | 76   | 81   | 101  | 110  | 104  | 105  | <b>0.78</b> |
| <b>CEBPB</b>   | 422  | 384  | 383  | 396  | 606  | 540  | 509  | 552  | <b>0.78</b> |
| <b>STAT3</b>   | 488  | 606  | 510  | 535  | 743  | 803  | 693  | 746  | <b>0.77</b> |
| <b>IFNGR1</b>  | 223  | 380  | 199  | 267  | 330  | 354  | 346  | 343  | <b>0.77</b> |
| <b>FYN</b>     | 1377 | 1642 | 1164 | 1394 | 1699 | 1829 | 1806 | 1778 | <b>0.77</b> |
| <b>BATF3</b>   | 9    | 5    | 4    | 6    | 1    | 8    | 8    | 6    | <b>0.77</b> |
| <b>ILF3</b>    | 1358 | 1909 | 1300 | 1522 | 2115 | 2153 | 1974 | 2081 | <b>0.77</b> |
| <b>STAT5A</b>  | 277  | 253  | 275  | 268  | 372  | 383  | 350  | 368  | <b>0.77</b> |
| <b>CRADD</b>   | 66   | 63   | 60   | 63   | 68   | 86   | 82   | 79   | <b>0.77</b> |
| <b>CTNNB1</b>  | 1235 | 1131 | 1044 | 1137 | 1491 | 1598 | 1483 | 1524 | <b>0.77</b> |
| <b>SDHA</b>    | 361  | 416  | 431  | 403  | 517  | 507  | 526  | 517  | <b>0.77</b> |
| <b>NFATC1</b>  | 105  | 149  | 116  | 123  | 178  | 193  | 161  | 177  | <b>0.77</b> |
| <b>ATM</b>     | 42   | 32   | 68   | 47   | 46   | 50   | 62   | 52   | <b>0.77</b> |
| <b>UBE2L3</b>  | 280  | 357  | 267  | 302  | 388  | 417  | 397  | 401  | <b>0.76</b> |
| <b>SOCS3</b>   | 518  | 665  | 399  | 527  | 653  | 710  | 696  | 686  | <b>0.76</b> |
| <b>IRF3</b>    | 651  | 773  | 546  | 657  | 802  | 938  | 869  | 870  | <b>0.76</b> |
| <b>BCL2</b>    | 696  | 760  | 638  | 698  | 958  | 1049 | 934  | 980  | <b>0.75</b> |
| <b>MAPK14</b>  | 232  | 249  | 175  | 219  | 280  | 318  | 293  | 297  | <b>0.75</b> |
| <b>CD46</b>    | 614  | 669  | 494  | 593  | 730  | 874  | 795  | 800  | <b>0.75</b> |
| <b>CD81</b>    | 494  | 525  | 534  | 518  | 706  | 721  | 697  | 708  | <b>0.74</b> |
| <b>CD96</b>    | 849  | 837  | 738  | 808  | 1057 | 1149 | 1090 | 1098 | <b>0.74</b> |
| <b>CD83</b>    | 575  | 715  | 494  | 595  | 853  | 890  | 803  | 849  | <b>0.74</b> |
| <b>CD7</b>     | 557  | 534  | 490  | 527  | 755  | 889  | 712  | 785  | <b>0.74</b> |
| <b>CD1D</b>    | 39   | 36   | 28   | 34   | 52   | 50   | 47   | 49   | <b>0.74</b> |

|                |       |       |       |       |       |       |       |       |             |
|----------------|-------|-------|-------|-------|-------|-------|-------|-------|-------------|
| <b>CUL9</b>    | 277   | 285   | 195   | 252   | 334   | 359   | 342   | 345   | <b>0.74</b> |
| <b>ITGA6</b>   | 482   | 507   | 427   | 472   | 727   | 740   | 640   | 702   | <b>0.74</b> |
| <b>IKZF1</b>   | 235   | 240   | 207   | 227   | 324   | 337   | 308   | 323   | <b>0.74</b> |
| <b>LTB4R</b>   | 42    | 50    | 44    | 45    | 63    | 73    | 62    | 66    | <b>0.73</b> |
| <b>LITAF</b>   | 708   | 905   | 710   | 774   | 1033  | 1172  | 1061  | 1088  | <b>0.73</b> |
| <b>CFH</b>     | 12    | 36    | 56    | 35    | 45    | 37    | 48    | 43    | <b>0.73</b> |
| <b>CD48</b>    | 2063  | 2487  | 1985  | 2179  | 3059  | 3212  | 2994  | 3088  | <b>0.73</b> |
| <b>IFITM1</b>  | 2115  | 2207  | 2013  | 2112  | 3098  | 3253  | 2908  | 3086  | <b>0.73</b> |
| <b>RPL19</b>   | 11624 | 13749 | 11493 | 12289 | 17785 | 19097 | 16926 | 17936 | <b>0.73</b> |
| <b>IL4R</b>    | 503   | 683   | 474   | 553   | 754   | 811   | 765   | 777   | <b>0.72</b> |
| <b>SOCS1</b>   | 72    | 131   | 88    | 97    | 146   | 129   | 134   | 137   | <b>0.72</b> |
| <b>ZEB1</b>    | 298   | 289   | 263   | 284   | 397   | 368   | 393   | 386   | <b>0.72</b> |
| <b>CCR7</b>    | 349   | 344   | 339   | 344   | 443   | 503   | 487   | 478   | <b>0.71</b> |
| <b>ITGA5</b>   | 280   | 375   | 307   | 321   | 426   | 467   | 457   | 450   | <b>0.70</b> |
| <b>CDKN1A</b>  | 370   | 434   | 403   | 402   | 593   | 625   | 576   | 598   | <b>0.70</b> |
| <b>LEF1</b>    | 1639  | 1886  | 1535  | 1686  | 2380  | 2579  | 2415  | 2458  | <b>0.70</b> |
| <b>NOD2</b>    | 66    | 77    | 88    | 77    | 92    | 96    | 110   | 100   | <b>0.70</b> |
| <b>TAGAP</b>   | 693   | 760   | 590   | 681   | 993   | 1024  | 977   | 998   | <b>0.70</b> |
| <b>EEF1G</b>   | 8039  | 9448  | 7798  | 8428  | 12219 | 13404 | 12126 | 12583 | <b>0.70</b> |
| <b>FCGR1A</b>  | 6     | 14    | 12    | 11    | 9     | 8     | 15    | 11    | <b>0.69</b> |
| <b>LAIR1</b>   | 102   | 95    | 116   | 104   | 136   | 143   | 150   | 143   | <b>0.69</b> |
| <b>CXCR1</b>   | 12    | 9     | 8     | 10    | 7     | 10    | 14    | 10    | <b>0.69</b> |
| <b>APP</b>     | 220   | 285   | 175   | 227   | 333   | 411   | 341   | 362   | <b>0.67</b> |
| <b>PPBP</b>    | 163   | 181   | 171   | 172   | 229   | 268   | 261   | 252   | <b>0.66</b> |
| <b>SKI</b>     | 485   | 425   | 411   | 440   | 631   | 745   | 680   | 685   | <b>0.65</b> |
| <b>NFKBIA</b>  | 2503  | 2768  | 2125  | 2465  | 3884  | 4207  | 3830  | 3974  | <b>0.64</b> |
| <b>CXCR4</b>   | 5220  | 5929  | 4465  | 5205  | 7648  | 8681  | 8137  | 8155  | <b>0.64</b> |
| <b>IRAK2</b>   | 12    | 27    | 8     | 16    | 15    | 22    | 25    | 21    | <b>0.63</b> |
| <b>ABCB1</b>   | 24    | 36    | 32    | 31    | 52    | 50    | 49    | 50    | <b>0.63</b> |
| <b>DPP4</b>    | 27    | 90    | 32    | 50    | 79    | 78    | 80    | 79    | <b>0.62</b> |
| <b>NFKBIZ</b>  | 1199  | 1235  | 957   | 1130  | 1870  | 1945  | 1824  | 1879  | <b>0.62</b> |
| <b>CR1</b>     | 127   | 122   | 88    | 112   | 149   | 216   | 183   | 183   | <b>0.61</b> |
| <b>KIR2DL3</b> | 18    | 14    | 8     | 13    | 15    | 17    | 22    | 18    | <b>0.61</b> |
| <b>IL6ST</b>   | 1717  | 1845  | 1316  | 1626  | 2652  | 2803  | 2676  | 2711  | <b>0.61</b> |
| <b>IL15</b>    | 6     | 14    | 12    | 11    | 10    | 16    | 17    | 14    | <b>0.61</b> |
| <b>STAT4</b>   | 199   | 280   | 219   | 233   | 379   | 417   | 384   | 394   | <b>0.61</b> |
| <b>NFKB1</b>   | 102   | 158   | 136   | 132   | 243   | 244   | 220   | 236   | <b>0.60</b> |
| <b>CCL20</b>   | 12    | 36    | 4     | 17    | 30    | 18    | 29    | 26    | <b>0.60</b> |
| <b>TGFBR2</b>  | 392   | 330   | 383   | 368   | 619   | 715   | 620   | 651   | <b>0.59</b> |
| <b>IL1RN</b>   | 57    | 41    | 56    | 51    | 79    | 90    | 87    | 85    | <b>0.59</b> |
| <b>TNFAIP3</b> | 2524  | 2831  | 2264  | 2540  | 4374  | 4795  | 4411  | 4527  | <b>0.58</b> |
| <b>TCF7</b>    | 2925  | 3252  | 2412  | 2863  | 4991  | 5335  | 4991  | 5106  | <b>0.57</b> |
| <b>NFKB2</b>   | 193   | 231   | 128   | 184   | 308   | 348   | 321   | 326   | <b>0.57</b> |
| <b>FKBP5</b>   | 205   | 204   | 144   | 184   | 318   | 349   | 324   | 330   | <b>0.57</b> |

|              |      |      |      |      |      |      |      |      |             |
|--------------|------|------|------|------|------|------|------|------|-------------|
| <b>PTK2</b>  | 42   | 63   | 48   | 51   | 96   | 91   | 92   | 93   | <b>0.56</b> |
| <b>IL7R</b>  | 1021 | 1208 | 965  | 1064 | 2080 | 2187 | 1933 | 2067 | <b>0.55</b> |
| <b>CXCL1</b> | 48   | 81   | 108  | 79   | 157  | 158  | 155  | 156  | <b>0.51</b> |
| <b>IL8</b>   | 2196 | 2637 | 2105 | 2312 | 4646 | 5008 | 4600 | 4751 | <b>0.50</b> |
| <b>IL1B</b>  | 111  | 158  | 163  | 144  | 330  | 322  | 345  | 332  | <b>0.42</b> |
| <b>CXCL2</b> | 12   | 45   | 56   | 38   | 131  | 123  | 105  | 120  | <b>0.36</b> |
| <b>CCL3</b>  | 24   | 54   | 44   | 41   | 159  | 152  | 146  | 152  | <b>0.28</b> |

**Supplemental Table 8. Transcriptional signature for pathogenic Th17 cells of CD146+CCR5+ Tcons in comparison with published work.**

| <b>Gene</b>          | <b>C146+CCR5+ Tconvs vs. T cells excluding CD146+CCR5+</b> | <b>Lee et al, <i>Nature Immunology</i> 2012 (40)</b> |
|----------------------|------------------------------------------------------------|------------------------------------------------------|
| <b><i>Cxcl3</i></b>  | Not present                                                | 4.52                                                 |
| <b><i>IL22</i></b>   | <b>1.20</b>                                                | 3.83                                                 |
| <b><i>IL3</i></b>    | 0.93                                                       | 2.57                                                 |
| <b><i>CCL4</i></b>   | 0.83                                                       | 1.97                                                 |
| <b><i>GZMB</i></b>   | 0.88                                                       | 1.87                                                 |
| <b><i>LRMP</i></b>   | Not present                                                | 1.79                                                 |
| <b><i>CCL5</i></b>   | <b>1.99</b>                                                | 1.79                                                 |
| <b><i>CASP1</i></b>  | 0.94                                                       | 1.76                                                 |
| <b><i>CSF2</i></b>   | 1.00                                                       | 1.75                                                 |
| <b><i>CCL3</i></b>   | 0.73                                                       | 1.75                                                 |
| <b><i>TBX21</i></b>  | <b>1.69</b>                                                | 1.72                                                 |
| <b><i>ICOS</i></b>   | 0.84                                                       | 1.72                                                 |
| <b><i>IL7R</i></b>   | 1.04                                                       | 1.71                                                 |
| <b><i>STAT4</i></b>  | <b>1.18</b>                                                | 1.67                                                 |
| <b><i>LGALS3</i></b> | Not present                                                | 1.56                                                 |
| <b><i>LAG3</i></b>   | Not present                                                | 1.55                                                 |
